# Supplementary material for: Occurrence of Hepatitis A Virus in Water Matrices: A Systematic Review and Meta-Analysis
Source: MDPI journal article supplement (doi:10.3390/ijerph20021054), 2023-01-06
Supplement: s1 [file s1]

**Figure S2:** Funnel chart for publications of the global hepatitis A virus prevalence in water matrices

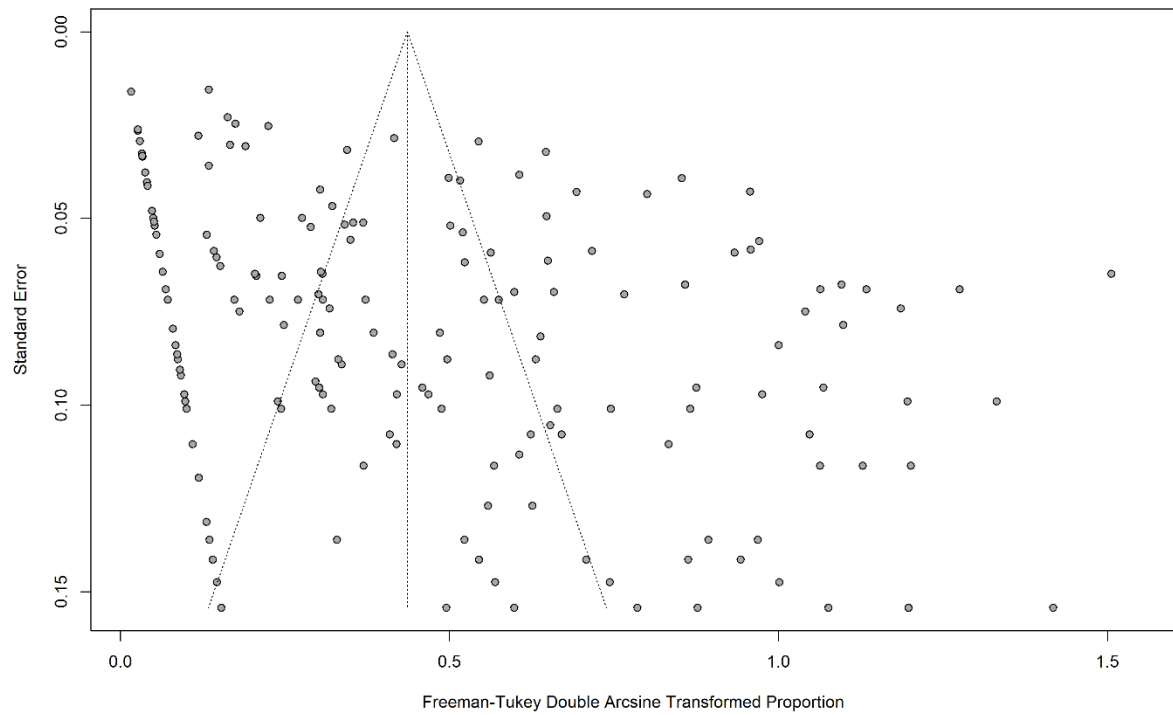

Note: The observation of the asymmetric distribution of the studies on this diagram indicates the existence of publication bias which is confirmed by this P value of the Egger test (P Egger test < 0.001)
