# Supplementary material for: Occurrence of Hepatitis A Virus in Water Matrices: A Systematic Review and Meta-Analysis
Source: MDPI journal article supplement (doi:10.3390/ijerph20021054), 2023-01-06
Supplement: s1 [file s1]

|                                                                                           | Positive | Total |  | Prevalence (%) | 95% CI         | Weight |
|-------------------------------------------------------------------------------------------|----------|-------|--|----------------|----------------|--------|
| Drinking water                                                                            |          |       |  |                |                |        |
| Ahmad, 2015_Pakistan_Tap water                                                            | 0        | 20    |  | 0.00           | [ 0.00; 16.84] | 0.5%   |
| Ahmad, 2018_Pakistan_Drinking water                                                       | 1        | 44    |  | 2.27           | [ 0.06; 12.02] | 0.5%   |
| Grabow, 2001_South Africa_Drinking water                                                  | 12       | 413   |  | 2.91           | [ 1.51; 5.02]  | 0.5%   |
| Hee, 2006_South Korea_Tap water                                                           | 0        | 33    |  | 0.00           | [ 0.00; 10.58] | 0.5%   |
| Kittigul, 2000_Thailand_Tap water                                                         | 0        | 32    |  | 0.00           | [ 0.00; 10.89] | 0.5%   |
| Kittigul, 2006_Thailand_Tap water                                                         | 0        | 100   |  | 0.00           | [ 0.00; 3.62]  | 0.5%   |
| Numanovic, 2004_Bosnia and Herzegovina_Drinking water                                     | 0        | 84    |  | 0.00           | [ 0.00; 4.30]  | 0.5%   |
| Puntaric, 1995_Croatia_Drinking water                                                     | 7        | 271   |  | 2.58           | [ 1.04; 5.25]  | 0.5%   |
| Purpari, 2019_Italy_Pipewater                                                             | 0        | 11    |  | 0.00           | [ 0.00; 28.49] | 0.4%   |
| Rigotto, 2010_Brazil_Drinking water                                                       | 2        | 24    |  | 8.33           | [ 1.03; 27.00] | 0.5%   |
| Verma, 2010_India_Drinking water                                                          | 0        | 356   |  | 0.00           | [ 0.00; 1.03]  | 0.5%   |
| Random effect meta-analysis                                                               |          | 1388  |  | 0.38           | [ 0.00; 1.75]  | 5.6%   |
| Prediction interval                                                                       |          |       |  |                | [ 0.00; 6.23]  | --     |
| Heterogeneity: I <sup>2</sup> = 64.4% [32.0%; 81.3%], τ <sup>2</sup> = 0.0041, p = 0.0018 |          |       |  |                |                |        |
| Groundwater                                                                               |          |       |  |                |                |        |
| Abbaszadegan, 1999_United States of America_Groundwater                                   | 12       | 139   |  | 8.63           | [ 4.54; 14.59] | 0.5%   |
| Bae, 2022_South Korea_Groundwater                                                         | 0        | 20    |  | 0.00           | [ 0.00; 16.84] | 0.5%   |
| Borchardt, 2003_United States of America_Well water                                       | 3        | 194   |  | 1.55           | [ 0.32; 4.45]  | 0.5%   |
| Borchardt, 2004_United States of America_Well water                                       | 4        | 48    |  | 8.33           | [ 2.32; 19.98] | 0.5%   |
| Carducci, 2003_Italy_Groundwater                                                          | 0        | 35    |  | 0.00           | [ 0.00; 10.00] | 0.5%   |
| De Gliglio, 2017_Italy_Well water                                                         | 0        | 364   |  | 0.00           | [ 0.00; 1.01]  | 0.5%   |
| De Serres, 1999_United States of America_Well water                                       | 6        | 10    |  | 60.00          | [26.24; 87.84] | 0.4%   |
| Fout, 2003_United States of America_Groundwater                                           | 4        | 321   |  | 1.25           | [ 0.34; 3.16]  | 0.5%   |
| Guerrero-Latorre, 2011_Chad_Wells, Boreholes                                              | 0        | 12    |  | 0.00           | [ 0.00; 26.46] | 0.4%   |
| Jothikumar, 2000_India_Bore well water samples; well water                                | 6        | 19    |  | 31.58          | [12.58; 56.55] | 0.5%   |
| Jung, 2011_South Korea_Groundwater                                                        | 0        | 39    |  | 0.00           | [ 0.00; 9.03]  | 0.5%   |
| Stokdyk, 2020_United States of America_Well water                                         | 0        | 964   |  | 0.00           | [ 0.00; 0.38]  | 0.5%   |
| Random effect meta-analysis                                                               |          | 2165  |  | 2.36           | [ 0.16; 6.09]  | 6.1%   |
| Prediction interval                                                                       |          |       |  |                | [ 0.00; 20.90] | --     |
| Heterogeneity: I <sup>2</sup> = 90% [84.6%; 93.6%], τ <sup>2</sup> = 0.0155, p < 0.0001   |          |       |  |                |                |        |
| Others                                                                                    |          |       |  |                |                |        |
| Ahmad, 2016_Pakistan_Drinking water, Sewage sample                                        | 12       | 95    |  | 12.63          | [ 6.70; 21.03] | 0.5%   |
| Amdiouini, 2017_Morocco_Raw wastewater; Treated effluents                                 | 4        | 50    |  | 8.00           | [ 2.22; 19.23] | 0.5%   |
| Carducci, 2008_Italy_Sewage samples (entry and exit samples)                              | 2        | 40    |  | 5.00           | [ 0.61; 16.92] | 0.5%   |
| Gharbi-Khelifi, 2011_Tunisia_Well-water samples; Drinking water samples                   | 5        | 10    |  | 50.00          | [18.71; 81.29] | 0.4%   |
| Hassine, 2010_Tunisia_Sewage sample                                                       | 10       | 93    |  | 10.75          | [ 5.28; 18.89] | 0.5%   |
| Hee, 2006_South Korea_Finished water                                                      | 0        | 92    |  | 0.00           | [ 0.00; 3.93]  | 0.5%   |
| Janahi, 2020_Bahrain_Influent; Effluent                                                   | 2        | 59    |  | 3.39           | [ 0.41; 11.71] | 0.5%   |
| Jebri, 2012_Tunisia_Raw water; Treated water                                              | 0        | 48    |  | 0.00           | [ 0.00; 7.40]  | 0.5%   |
| Katukiza, 2013_Uganda_Grey water                                                          | 3        | 11    |  | 27.27          | [ 6.02; 60.97] | 0.4%   |
| Nasiri, 2021_Iran_In...uent, before chlorination, e...uent                                | 15       | 18    |  | 83.33          | [58.58; 96.42] | 0.5%   |
| Peláez, 2016_Colombia_Untreated wastewater; Treated wastewater                            | 77       | 288   |  | 26.74          | [21.71; 32.24] | 0.5%   |
| Pina, 1998_Spain_Slaughterhouse sewage                                                    | 0        | 17    |  | 0.00           | [ 0.00; 19.51] | 0.5%   |
| Rachida, 2016_South Africa_Irrigation water                                               | 8        | 11    |  | 72.73          | [39.03; 93.98] | 0.4%   |
| Saadoun, 2021_Jordan_Raw sewage; Treated sewage; Surface and pond water                   | 0        | 33    |  | 0.00           | [ 0.00; 10.58] | 0.5%   |
| Schvoerer, 2000_France_Treated water, Untreated wastewater                                | 3        | 13    |  | 23.08          | [ 5.04; 53.81] | 0.5%   |
| Shin, 2019_South Korea_Irrigation water                                                   | 0        | 14    |  | 0.00           | [ 0.00; 23.16] | 0.5%   |
| Simmons , 2011_United States of America_Wastewater (influent and effluent)                | 0        | 30    |  | 0.00           | [ 0.00; 11.57] | 0.5%   |
| Truchado, 2021_Spain_Sewage effluent; Sewage influent                                     | 12       | 475   |  | 2.53           | [ 1.31; 4.37]  | 0.5%   |
| Tucker, 2000_United States of America_Groundwater, Surface water                          | 1        | 24    |  | 4.17           | [ 0.11; 21.12] | 0.5%   |
| Wang, 2018_Sweden_Sewage effluent; Sewage influent                                        | 0        | 12    |  | 0.00           | [ 0.00; 26.46] | 0.4%   |
| Wang, 2020_South Korea_Irrigation water                                                   | 0        | 96    |  | 0.00           | [ 0.00; 3.77]  | 0.5%   |
| Random effect meta-analysis                                                               |          | 1529  |  | 8.53           | [ 3.16; 15.69] | 10.4%  |
| Prediction interval                                                                       |          |       |  |                | [ 0.00; 50.79] | --     |
| Heterogeneity: I <sup>2</sup> = 92.6% [90.0%; 94.5%], τ <sup>2</sup> = 0.0477, p < 0.0001 |          |       |  |                |                |        |
| Surface water                                                                             |          |       |  |                |                |        |
| Ahmad, 2015_Pakistan_Surface water samples                                                | 0        | 30    |  | 0.00           | [ 0.00; 11.57] | 0.5%   |
| Ahmad, 2018_Pakistan_River water                                                          | 2        | 26    |  | 7.69           | [ 0.95; 25.13] | 0.5%   |
| Aw, 2011_Singapore_Surface water                                                          | 4        | 45    |  | 8.89           | [ 2.48; 21.22] | 0.5%   |
| Bahk, 2020_South Korea_River samples                                                      | 4        | 100   |  | 4.00           | [ 1.10; 9.93]  | 0.5%   |
| Bai, 2019_Philippines_River samples                                                       | 7        | 12    |  | 58.33          | [27.67; 84.83] | 0.4%   |
| Borchardt, 2004_United States of America_River water                                      | 0        | 12    |  | 0.00           | [ 0.00; 26.46] | 0.4%   |
| Carducci, 2006_Italy_River water, Seawater                                                | 0        | 24    |  | 0.00           | [ 0.00; 14.25] | 0.5%   |
| Chigor, 2012_South Africa_River water                                                     | 31       | 72    |  | 43.06          | [31.43; 55.27] | 0.5%   |
| Cioffi, 2021_Italy_Seawater                                                               | 0        | 225   |  | 0.00           | [ 0.00; 1.63]  | 0.5%   |
| Corsi, 2014_United States of America_River water                                          | 1        | 63    |  | 1.59           | [ 0.04; 8.53]  | 0.5%   |
| De Paula, 2007_Brazil_River water                                                         | 48       | 52    |  | 92.31          | [81.46; 97.86] | 0.5%   |
| de Souza, 2018_Brazil_Streams water                                                       | 1        | 84    |  | 1.19           | [ 0.03; 6.46]  | 0.5%   |
| Denis-Mize, 2004_United States of America_Stream water                                    | 4        | 15    |  | 26.67          | [ 7.79; 55.10] | 0.5%   |
| Dias, 2018_Brazil_Seawater                                                                | 1        | 48    |  | 2.08           | [ 0.05; 11.07] | 0.5%   |
| Divizia, 1993_Italy_River water                                                           | 9        | 13    |  | 69.23          | [38.57; 90.91] | 0.5%   |
| Elmahdy, 2016_Brazil_Surface water                                                        | 14       | 48    |  | 29.17          | [16.95; 44.06] | 0.5%   |
| Elmahdy, 2016_Brazil_Surface water                                                        | 13       | 48    |  | 27.08          | [15.28; 41.85] | 0.5%   |
| Farkas, 2018_United Kingdom_Surface water                                                 | 0        | 52    |  | 0.00           | [ 0.00; 6.85]  | 0.5%   |
| Félix, 2010_Mexico_Marine recreational waters                                             | 3        | 32    |  | 9.38           | [ 1.98; 25.02] | 0.5%   |
| Fernández-Molina, 2004_Spain_Spring water; River water                                    | 16       | 51    |  | 31.37          | [19.11; 45.89] | 0.5%   |
| Fongaro, 2012_Brazil_Surface water                                                        | 6        | 48    |  | 12.50          | [ 4.73; 25.25] | 0.5%   |
| Fongaro, 2019_Brazil_River water                                                          | 39       | 45    |  | 86.67          | [73.21; 94.95] | 0.5%   |
| Fumian, 2018_Brazil_River water, Lagoon water                                             | 7        | 32    |  | 21.88          | [ 9.28; 39.97] | 0.5%   |
| Gersberg, 2006_United States of America_Ocean water samples                               | 11       | 20    |  | 55.00          | [31.53; 76.94] | 0.5%   |
| Hee, 2006_South Korea_Surface water                                                       | 0        | 223   |  | 0.00           | [ 0.00; 1.64]  | 0.5%   |
| Hernandez-Morga, 2009_Mexico_Estuarine water samples                                      | 32       | 40    |  | 80.00          | [64.35; 90.95] | 0.5%   |
| Hot, 2003_France_River water                                                              | 1        | 68    |  | 1.47           | [ 0.04; 7.92]  | 0.5%   |
| Iaconelli, 2015_Italy_River water                                                         | 2        | 27    |  | 7.41           | [ 0.91; 24.29] | 0.5%   |
| Iaconelli, 2017_Italy_River water                                                         | 2        | 28    |  | 7.14           | [ 0.88; 23.50] | 0.5%   |
| Jiang, 2004_United States of America_River water                                          | 16       | 21    |  | 76.19          | [52.83; 91.78] | 0.5%   |
| Jones, 2017_Canada_River water                                                            | 18       | 1032  |  | 1.74           | [ 1.04; 2.74]  | 0.5%   |
| Katukiza, 2013_Uganda_Surface water                                                       | 4        | 26    |  | 15.38          | [ 4.36; 34.87] | 0.5%   |
| Kittigul, 2000_Thailand_Surface water from canals                                         | 3        | 20    |  | 15.00          | [ 3.21; 37.89] | 0.5%   |
| Kittigul, 2006_Thailand_Swamps; Canals                                                    | 9        | 80    |  | 11.25          | [ 5.28; 20.28] | 0.5%   |
| Kiulia, 2010_Kenya_River water                                                            | 8        | 29    |  | 27.59          | [12.73; 47.24] | 0.5%   |
| Kokkinos, 2018_Greece_Seawater; River water                                               | 1        | 72    |  | 1.39           | [ 0.04; 7.50]  | 0.5%   |
| La Rosa, 2017_Italy_River water                                                           | 3        | 32    |  | 9.38           | [ 1.98; 25.02] | 0.5%   |
| La Rosa, 2021_Italy_Seawater; Discharge water                                             | 19       | 392   |  | 4.85           | [ 2.94; 7.47]  | 0.5%   |
| Lazic, 2015_Serbia_Untreated surface water                                                | 0        | 60    |  | 0.00           | [ 0.00; 5.96]  | 0.5%   |
| Lee, 2008_South Korea_River water                                                         | 2        | 58    |  | 3.45           | [ 0.42; 11.91] | 0.5%   |
| Lee, 2014_South Korea_Surface water                                                       | 9        | 265   |  | 3.40           | [ 1.56; 6.35]  | 0.5%   |
| Lenaker, 2017_United States of America_River water                                        | 0        | 290   |  | 0.00           | [ 0.00; 1.26]  | 0.5%   |
| Masachessi, 2018_Argentina_Dam water sample, beaches water sample                         | 11       | 114   |  | 9.65           | [ 4.92; 16.61] | 0.5%   |
| Miagostovich, 2014_Brazil_Surface water                                                   | 0        | 108   |  | 0.00           | [ 0.00; 3.36]  | 0.5%   |
| Morace, 1993_Italy_River water                                                            | 8        | 13    |  | 61.54          | [31.58; 86.14] | 0.5%   |
| Moresco, 2012_Brazil_Seawater                                                             | 68       | 132   |  | 51.52          | [42.66; 60.30] | 0.5%   |
| Nasser, 1987_United States of America_Seawater                                            | 3        | 20    |  | 15.00          | [ 3.21; 37.89] | 0.5%   |
| Ngaosuwanikul, 2013_Thailand_Flood water samples                                          | 7        | 100   |  | 7.00           | [ 2.86; 13.89] | 0.5%   |
| O'Brien, 2017_Uganda_Swamp                                                                | 8        | 12    |  | 66.67          | [34.3          |        |
