# Supplementary material for: Occurrence of Hepatitis A Virus in Water Matrices: A Systematic Review and Meta-Analysis
Source: MDPI journal article supplement (doi:10.3390/ijerph20021054), 2023-01-06
Supplement: s1 [file s1]

## Supplemental Material

### Hepatitis A virus in water environments: a systematic review and meta-analysis

Guy Roussel Takuissu <sup>1</sup>, Sebastien Kenmoe <sup>2</sup>, Jean Thierry Ebogo-Belobo <sup>3</sup>, Cyprien Kengne-Ndé <sup>4</sup>,  
Donatien Serge Mbaga <sup>5</sup>, Arnol Bowo-Ngandji <sup>5</sup>, Juliette Laure Ndzie Ondigui <sup>5</sup>,  
Raoul Kenfack-Momo <sup>6</sup>, Serges Tchatchouang <sup>7</sup>, Josiane Kenfack-Zanguim <sup>6</sup>,  
Robertine Lontuo Fogang <sup>8</sup>, Elisabeth Zeuko'o Menkem <sup>9</sup>, Ginette Irma Kame-Ngasse <sup>3</sup>,  
Jeannette Nina Magoudjou-Pekam <sup>6</sup>, Carolina Veneri <sup>10</sup>, Pamela Mancini <sup>10</sup>,  
Giusy Bonanno Ferraro <sup>10</sup>, Marcello Iaconelli <sup>10</sup>, Lidia Orlandi <sup>10</sup>, Claudia Del Giudice <sup>10</sup>,  
Elisabetta Suffredini <sup>11</sup> and Giuseppina La Rosa <sup>10,\*</sup>

<sup>1</sup> Centre for Food, Food Security and Nutrition Research, Institute of Medical Research and Medicinal Plants Studies, Yaounde, Cameroon

<sup>2</sup> Department of Microbiology and Parasitology, University of Buea, Buea, Cameroon

<sup>3</sup> Medical Research Centre, Institute of Medical Research and Medicinal Plants Studies, Yaounde, Cameroon

<sup>4</sup> Epidemiological Surveillance, Evaluation and Research Unit, National AIDS Control Committee, Yaounde, Cameroon

<sup>5</sup> Department of Microbiology, The University of Yaounde I, Yaounde, Cameroon

<sup>6</sup> Department of Biochemistry, The University of Yaounde I, Yaounde, Cameroon

<sup>7</sup> Scientific Direction, Centre Pasteur du Cameroun, Yaounde, Cameroon

<sup>8</sup> Department of Animal Biology, University of Dschang, Dschang, Cameroon

<sup>9</sup> Department of Biomedical Sciences, University of Buea, Buea, Cameroon

<sup>10</sup> Department of Environment and Health, Istituto Superiore di Sanità, 00161 Rome, Italy

<sup>11</sup> Department of Food Safety, Nutrition and Veterinary Public Health, Istituto Superiore di Sanità, 00161 Rome, Italy

\* Correspondence: giuseppina.larosa@iss.it

## Table of Contents

**Table S1:** Search strategy

**Table S2:** Items for risk of bias assessment

**Table S3:** Main reasons of exclusion of eligible studies

**Table S4:** Characteristics of included studies

**Table S5:** Individual characteristics of included studies

**Table S6:** Risk of bias assessment

**Table S7:** Detailed results of meta-analysis results for prevalence of hepatitis A virus in various water matrices.

**Figure S1:** Global prevalence estimate of hepatitis A virus in various water matrices

**Figure S2:** Funnel chart for publications of the global hepatitis A virus prevalence in water matrices

**Table S1:** Search strategy

| Search | Fields             |                                                                                                                                                                                                                                                                                                                 |
|--------|--------------------|-----------------------------------------------------------------------------------------------------------------------------------------------------------------------------------------------------------------------------------------------------------------------------------------------------------------|
| #1     | HEV                | Hepatitis A virus OR HAV OR Hepatitis A OR Hep A OR Viral hepatitis A OR VHA                                                                                                                                                                                                                                    |
| #2     | Water environments | Water OR "Waste Water" OR Sewage OR Wastewater OR River OR "Surface water" OR Groundwater OR "brackish water" OR Seawater OR "sea water" OR "wastewater treatment plant" OR influent OR effluent OR "drinking water" OR "tap water" OR "potable water" OR lake OR "fresh water" OR freshwater OR "marine water" |
| #3     |                    | #1 AND #2                                                                                                                                                                                                                                                                                                       |

**Table S2:** Items for risk of bias assessment

| Modified Hoy et al. tool for cross sectional studies | Yes (1)/No (0) |
|------------------------------------------------------|----------------|
| <i>External validity</i>                             |                |

|                                                                                                                                                                                                  |          |
|--------------------------------------------------------------------------------------------------------------------------------------------------------------------------------------------------|----------|
| 1. Was the study's target population a close representation of the national population in relation to hepatitis A virus prevalence?                                                              | 1        |
| 2. Was the sampling frame a true or close representation of the samples?                                                                                                                         | 1        |
| 3. Was some form of random selection used to select the sample?                                                                                                                                  | 1        |
| 4. Did the author calculate and respect the expected sample size?                                                                                                                                | 1        |
| <b>Internal validity</b>                                                                                                                                                                         |          |
| 5. Was an acceptable water matrix definition used in the study?                                                                                                                                  | 1        |
| 6. Was the HAV detection assay shown to have validity and reliability?                                                                                                                           | 1        |
| 7. Was the same mode of data collection used for all samples?                                                                                                                                    | 1        |
| 8. Was the length of the study period > or = 1 year?                                                                                                                                             | 1        |
| 9. Were the numerator(s) and denominator(s) for the prevalence of hepatitis A virus reported?                                                                                                    | 1        |
| <b>Total score</b>                                                                                                                                                                               | <b>9</b> |
| <b>Interpretation of the risk of bias tool</b> <ul style="list-style-type: none"> <li>• 7-9: Low risk of bias</li> <li>• 4-6: Moderate risk of bias</li> <li>• 0-3: High risk of bias</li> </ul> |          |

Modified from: Hoy D, Brooks P, Woolf A, Blyth F, March L, Bain C, et al. Assessing risk of bias in prevalence studies: modification of an existing tool and evidence of interrater agreement. J Clin Epidemiol. 2012;65: 934–939. doi:10.1016/j.jclinepi.2011.11.014

**Table S3:** Main reasons of exclusion of eligible studies

| N° | Author, Year       | Title                                                                                                                                              | Reason of exclusion                         |
|----|--------------------|----------------------------------------------------------------------------------------------------------------------------------------------------|---------------------------------------------|
| 1  | Abad, 1994         | Disinfection of human enteric viruses in water by copper and silver in combination with low levels of chlorine.                                    | No data on HAV prevalence in water matrices |
| 2  | Abbaszadegan, 1993 | Evaluation of a microbiological water purifier for inactivation of viruses, bacteria and Giardia cysts.                                            | No data on HAV prevalence in water matrices |
| 3  | Abd El Galil, 2004 | Combined immunomagnetic separation-molecular beacon-reverse transcription-PCR assay for detection of hepatitis A virus from environmental samples. | Comment on an article                       |
| 4  | Abd el-Galil, 2005 | Real-time nucleic acid sequence-based amplification assay for detection of hepatitis A virus.                                                      | Comment on an article                       |

|    |                         |                                                                                                                                                                                             |                                             |
|----|-------------------------|---------------------------------------------------------------------------------------------------------------------------------------------------------------------------------------------|---------------------------------------------|
| 5  | Abdullah, 1997          | Hepatitis A from unsafe water.                                                                                                                                                              | Full text or abstract not found             |
| 6  | Abraira, 2000           | A soccer championship and hepatitis A outbreak.                                                                                                                                             | No data on HAV prevalence in water matrices |
| 7  | Ahmed, 2020             | Prevalence of Waterborne Diseases in Bade, Nguru and Machina Local Government Areas of Yobe State-Nigeria.                                                                                  | No data on HAV prevalence in water matrices |
| 8  | Ahmed, 2020             | Estimation of hepatitis a virus infection prevalence through drinking water supply of primary schools of Sindh, Pakistan.                                                                   | No data on HAV prevalence in water matrices |
| 9  | Ahmed, 2021             | Comparative analysis of rapid concentration methods for the recovery of SARS-CoV-2 and quantification of human enteric viruses and a sewage-associated marker gene in untreated wastewater. | No data on HAV prevalence in water matrices |
| 10 | Ali, 2004               | Detection of enteric viruses, Giardia and Cryptosporidium in two different types of drinking water treatment facilities.                                                                    | No data on HAV prevalence in water matrices |
| 11 | Ali, 1997               | New approaches to virus removal: the way to produce virus-free drinking water.                                                                                                              | Full text or abstract not found             |
| 12 | Ali, 2021               | Occurrence of various viruses and recent evidence of SARS-CoV-2 in wastewater systems.                                                                                                      | Review                                      |
| 13 | Ali., 1997              | Ultraviolet, chlorine and ozone disinfection of some enteroviruses in drinking water and treated effluents.                                                                                 | Full text or abstract not found             |
| 14 | Almeida, 2001           | The epidemiology of hepatitis A in Rio de Janeiro: Environmental and domestic risk factors.                                                                                                 | No data on HAV prevalence in water matrices |
| 15 | Alonso, 2006            | Microbiological quality of reclaimed water used for golf courses' irrigation.                                                                                                               | No data on HAV prevalence in water matrices |
| 16 | Alouini, 1995           | Evaluation of an extraction-precipitation method for recovering hepatitis a virus and poliovirus from hardshell clams ( <i>Mercenaria mercenaria</i> ).                                     | No data on HAV prevalence in water matrices |
| 17 | Amado, 2018             | A large hepatitis a outbreak in Rio de Janeiro reinforces the need for vaccination of risk groups.                                                                                          | Sample size < or = 10 participants          |
| 18 | Amado, 2011             | Exposure to multiple subgenotypes of hepatitis A virus during an outbreak using matched serum and saliva specimens.                                                                         | No data on HAV prevalence in water matrices |
| 19 | Ambrozic, 2009          | Food-borne viruses and food safety considerations.                                                                                                                                          | No data on HAV prevalence in water matrices |
| 20 | Anderson-Coughlin, 2021 | Enteric Viruses and Pepper Mild Mottle Virus Show Significant Correlation in Select Mid-Atlantic Agricultural Waters.                                                                       | No data on HAV prevalence in water matrices |
| 21 | Anderson-Coughlin, 2019 | Recovery and Detection of Enteric Viruses from Non-Traditional Irrigation Water Sources.                                                                                                    | No data on HAV prevalence in water matrices |
| 22 | Arnal, 1998             | Persistence of infectious hepatitis A virus and its genome in artificial seawater.                                                                                                          | Full text or abstract not found             |

|    |                       |                                                                                                                                                                                  |                                             |
|----|-----------------------|----------------------------------------------------------------------------------------------------------------------------------------------------------------------------------|---------------------------------------------|
| 23 | Arnone, 2007          | Waterborne pathogens in urban watersheds.                                                                                                                                        | No data on HAV prevalence in water matrices |
| 24 | Arora, 2013           | Water borne hepatitis A and hepatitis E in Malwa Region of Punjab, India.                                                                                                        | No data on HAV prevalence in water matrices |
| 25 | Arraj, 2008           | An epidemiological study of enteric viruses in sewage with molecular characterization by RT-PCR and sequence analysis.                                                           | No data on HAV prevalence in water matrices |
| 26 | Arraj, 2005           | Comparison of bacteriophage and enteric virus removal in pilot scale activated sludge plants.                                                                                    | No data on HAV prevalence in water matrices |
| 27 | Arvanitidou, 2004     | Epidemiological evidence for vaccinating wastewater treatment plant workers against hepatitis A and hepatitis B virus.                                                           | No data on HAV prevalence in water matrices |
| 28 | Ashbolt, 2004         | Microbial contamination of drinking water and disease outcomes in developing regions.                                                                                            | No data on HAV prevalence in water matrices |
| 29 | Aziz, 2005            | Management of source and drinking-water quality in Pakistan.                                                                                                                     | Review                                      |
| 30 | Báez, 2016            | Evidence of the circulation of hepatitis A virus, subgenotype IA, in environmental samples from Antioquia, Colombia.                                                             | Article not in English or in French         |
| 31 | Bagdasarjan, 1979     | Human viruses in water, wastewater and soil.                                                                                                                                     | Review                                      |
| 32 | Baggi, 2001           | Persistence of viral pathogens and bacteriophages during sewage treatment: lack of correlation with indicator bacteria.                                                          | No data on HAV prevalence in water matrices |
| 33 | Bahcebasi, 1997       | Health and the quality of drinking water in Adana City Centre, Turkey.                                                                                                           | Full text or abstract not found             |
| 34 | Balasubramanian, 2016 | Enhancing quantitative-PCR-based detection of pathogenic enteric viruses in coastal marine environment using monolithic chromatographic supports.                                | No data on HAV prevalence in water matrices |
| 35 | Barathidasan, 2020    | Epidemiological and molecular investigation of a hepatitis A outbreak in Tamil Nadu, Southern India.                                                                             | No data on HAV prevalence in water matrices |
| 36 | Barrett, 2019         | Impact of Public Health Interventions on Drinking Water-Associated Outbreaks of Hepatitis A - United States, 1971-2017.                                                          | Review                                      |
| 37 | Barrimah, 1999        | An outbreak of hepatitis A associated with treated waste water used for irrigation.                                                                                              | No data on HAV prevalence in water matrices |
| 38 | Batik, 1980           | An epidemiologic study of the relationship between hepatitis A and water supply characteristics and treatment.                                                                   | No data on HAV prevalence in water matrices |
| 39 | Bazzardi, 2014        | Preliminary Study on Norovirus, Hepatitis A Virus, Escherichia coli and their Potential Seasonality in Shellfish from Different Growing and Harvesting Areas in Sardinia Region. | No data on HAV prevalence in water matrices |
| 40 | Belabbes, 1985        | Epidemic non-A, non-B viral hepatitis in Algeria: Strong evidence for its spreading by water.                                                                                    | No data on HAV prevalence in water matrices |

|    |                       |                                                                                                                                              |                                                |
|----|-----------------------|----------------------------------------------------------------------------------------------------------------------------------------------|------------------------------------------------|
| 41 | Benabbes, 2013        | Norovirus and Other Human Enteric Viruses in Moroccan Shellfish.                                                                             | No data on HAV prevalence in water matrices    |
| 42 | Benckert, 2001        | [Diagnosis and clinical features of infection with hepatitis A and hepatitis E viruses. Transmission through drinking water and foodstuffs]. | Article not in English or in French            |
| 43 | Berg, 1978            | Indicators of viruses in water and food.                                                                                                     | Review                                         |
| 44 | Bergeisen, 1985       | A waterborne outbreak of hepatitis A in Meade County, Kentucky.                                                                              | No data on HAV prevalence in water matrices    |
| 45 | Betancourt, 2010      | Molecular characterization of sewage-borne pathogens and detection of sewage markers in an urban stream in Caracas, Venezuela.               | No data on HAV prevalence in water matrices    |
| 46 | Bigoraj, 2014         | Occurrence of Norovirus and Hepatitis A Virus in Wild Mussels Collected from the Baltic Sea.                                                 | No data on HAV prevalence in water matrices    |
| 47 | Biziagos, 1988        | Long-term survival of hepatitis A virus and poliovirus type 1 in mineral water.                                                              | No data on HAV prevalence in water matrices    |
| 48 | Biziagos, 1989        | Hepatitis A virus concentration from experimentally contaminated distilled, tap, waste and seawater.                                         | No data on HAV prevalence in water matrices    |
| 49 | Blaise-Boisseau, 2010 | Duplex real-time qRT-PCR for the detection of hepatitis A virus in water and raspberries using the MS2 bacteriophage as a process control.   | No data on HAV prevalence in water matrices    |
| 50 | Bloch, 1990           | Recovery of hepatitis A virus from a water supply responsible for a common source outbreak of hepatitis A.                                   | No data on HAV prevalence in water matrices    |
| 51 | Blokhin, 1992         | Improvement of the method of gathering of hepatitis A viruses and its evaluation by water analysis.                                          | Article not in English or in French            |
| 52 | Borgmästars, 2017     | Improved Detection of Norovirus and Hepatitis A Virus in Surface Water by Applying Pre-PCR Processing.                                       | Sample size < or = 10 participants             |
| 53 | Borgmästars, 2021     | Comparison of Skimmed Milk and Lanthanum Flocculation for Concentration of Pathogenic Viruses in Water.                                      | Sample size < or = 10 participants             |
| 54 | Bosch, 1993           | Disinfection of human enteric viruses in water by copper: Silver and reduced levels of chlorine.                                             | No data on HAV prevalence in water matrices    |
| 55 | Bosch, 1991           | Concentration of hepatitis A virus in environmental samples.                                                                                 | Not possible to extract data on HAV prevalence |
| 56 | Bosch, 2008           | New tools for the study and direct surveillance of viral pathogens in water.                                                                 | Review                                         |
| 57 | Bosch, 2001           | Human enteric viruses in Coquina clams associated with a large hepatitis A outbreak.                                                         | No data on HAV prevalence in water matrices    |
| 58 | Bowen, 1983           | Hepatitis A associated with a hardware store water fountain and a contaminated well in Lancaster County, Pennsylvania, 1980.                 | No data on HAV prevalence in water matrices    |
| 59 | Boxman, 2016          | International linkage of two food-borne hepatitis a clusters through traceback of mussels, The Netherlands, 2012.                            | No data on HAV prevalence in water matrices    |

|    |                       |                                                                                                                                                |                                                |
|----|-----------------------|------------------------------------------------------------------------------------------------------------------------------------------------|------------------------------------------------|
| 60 | Bozaykut, 2012        | Environmental risk factors for hepatitis a.                                                                                                    | No data on HAV prevalence in water matrices    |
| 61 | Braga, 2008           | [Estimation of risk areas for hepatitis A].                                                                                                    | Article not in English or in French            |
| 62 | Brake, 2018           | Spatial and Temporal Distribution of Norovirus and E. coli in Sydney Rock Oysters Following a Sewage Overflow into an Estuary.                 | No data on HAV prevalence in water matrices    |
| 63 | Brassard, 2011        | Simultaneous recovery of bacteria and viruses from contaminated water and spinach by a filtration method.                                      | No data on HAV prevalence in water matrices    |
| 64 | Brassard, 2005        | Concentration and detection of hepatitis A virus and rotavirus in spring water samples by reverse transcription-PCR.                           | No data on HAV prevalence in water matrices    |
| 65 | Brisebois, 2018       | Human viral pathogens are pervasive in wastewater treatment center aerosols.                                                                   | No data on HAV prevalence in water matrices    |
| 66 | Brooks, 2005          | Detection and quantification of hepatitis A virus in seawater via real-time RT-PCR.                                                            | No data on HAV prevalence in water matrices    |
| 67 | Brown, 2000           | Investigations of the epidemiology of infections with hepatitis A virus in Jamaica.                                                            | No data on HAV prevalence in water matrices    |
| 68 | Brunkard, 2011        | Surveillance for waterborne disease outbreaks associated with drinking water - united states, 2007-2008.                                       | No data on HAV prevalence in water matrices    |
| 69 | Bryan, 1974           | An outbreak of hepatitis A associated with recreational lake water.                                                                            | No data on HAV prevalence in water matrices    |
| 70 | Buehler, 1984         | Hepatitis A, a day care home and a contaminated well.                                                                                          | Full text or abstract not found                |
| 71 | Butot, 2004           | Attachment of enteric viruses to bottles.                                                                                                      | No data on HAV prevalence in water matrices    |
| 72 | Cabezas Sánchez, 2018 | Infectious diseases related to water in Peru.                                                                                                  | Article not in English or in French            |
| 73 | Cadamuro, 2021        | Enteric viruses in lentic and lotic freshwater habitats from Brazil's Midwest and South regions in the Guarani Aquifer area.                   | Not possible to extract data on HAV prevalence |
| 74 | Callahan, 1995        | Comparative survival of hepatitis a virus, poliovirus and indicator viruses in geographically diverse seawaters.                               | No data on HAV prevalence in water matrices    |
| 75 | Cannella, 2010        | Detection of human enteric viruses in shellfish, vegetables, waters and environmental samples: A preliminary study.                            | Not possible to extract data on HAV prevalence |
| 76 | Casas, 2002           | Detection of enteroviruses, hepatitis a virus and rotaviruses in sewage by means of an immunomagnetic capture reverse transcription-PCR assay. | Sample size < or = 10 participants             |
| 77 | Cecuk, 1993           | Human viruses in the costal environment of a Croatian harbour.                                                                                 | Full text or abstract not found                |

|    |                                                  |                                                                                                                                                                                  |                                             |
|----|--------------------------------------------------|----------------------------------------------------------------------------------------------------------------------------------------------------------------------------------|---------------------------------------------|
| 78 | Célia da Silva Lanna, 2019                       | Household-based biodigesters promote reduction of enteric virus and bacteria in vulnerable and poverty rural area.                                                               | No data on HAV prevalence in water matrices |
| 79 | Centers for Disease Control and Prevention, 1997 | Hepatitis A associated with consumption of frozen strawberries--Michigan, March 1997.                                                                                            | No data on HAV prevalence in water matrices |
| 80 | Centers for Disease Control and Prevention, 2011 | Establishment of a viral hepatitis surveillance system--Pakistan, 2009-2011.                                                                                                     | No data on HAV prevalence in water matrices |
| 81 | Chadha, 2009                                     | Outbreaks of hepatitis A among children in western India.                                                                                                                        | Sample size < or = 10 participants          |
| 82 | Chakraborty, 1982                                | Non-A non-B viral hepatitis: A common-source outbreak traced to sewage contamination of drinking water.                                                                          | Full text or abstract not found             |
| 83 | Chang, 1997                                      | Detection of hepatitis A virus in environmental samples by coupled reverse transcription and polymerase chain reaction.                                                          | No data on HAV prevalence in water matrices |
| 84 | Chen, 2011                                       | [A hepatitis A outbreak caused by contaminated well water in a primary school of Jiangxi province, China, 2009].                                                                 | Article not in English or in French         |
| 85 | Chesnot, 2012                                    | Investigating emerging microbiological risks in local river water used by water treatment plants in the Paris metropolitan area.                                                 | No data on HAV prevalence in water matrices |
| 86 | Chigor, 2014                                     | Assessment of the Risks for Human Health of Adenoviruses, Hepatitis A Virus, Rotaviruses and Enteroviruses in the Buffalo River and Three Source Water Dams in the Eastern Cape. | No data on HAV prevalence in water matrices |
| 87 | Chobe, 2009                                      | Investigation of a hepatitis A outbreak from Shimla Himachal Pradesh.                                                                                                            | Sample size < or = 10 participants          |
| 88 | Christiansen, 1957                               | A water-borne hepatitis epidemic.                                                                                                                                                | Full text or abstract not found             |
| 89 | Chung, 1993                                      | Comparative survival of indicator viruses and enteric viruses in seawater and sediment.                                                                                          | No data on HAV prevalence in water matrices |
| 90 | Clark, 1982                                      | An environmental health survey of drinking water contamination by leachate from a pesticide waste dump in Hardeman County, Tennessee.                                            | No data on HAV prevalence in water matrices |
| 91 | Clarke, 1970                                     | Viruses occurring in water.                                                                                                                                                      | Full text or abstract not found             |
| 92 | Clarke, 1964                                     | HUMAN ENTERIC VIRUSES IN SEWAGE.                                                                                                                                                 | Full text or abstract not found             |
| 93 | Clover, 1985                                     | Vehicular transmission of hepatitis A.                                                                                                                                           | Full text or abstract not found             |
| 94 | Clover, 2010                                     | Early days of food and environmental virology.                                                                                                                                   | Review                                      |
| 95 | Coelho, 2003                                     | Hepatitis A virus detection in oysters ( <i>Crassostrea gigas</i> ) in Santa Catarina State, Brazil, by reverse transcription-polymerase chain reaction.                         | No data on HAV prevalence in water matrices |
| 96 | Cormier, 2016                                    | Concentration and detection of hepatitis A virus and its indicator from artificial seawater using zeolite.                                                                       | No data on HAV prevalence in water matrices |
| 97 | Coudray-Meunier, 2015                            | A comparative study of digital RT-PCR and RT-qPCR for quantification of Hepatitis A virus and Norovirus in lettuce and water samples.                                            | No data on HAV prevalence in water matrices |



|     |                       |                                                                                                                                                    |                                             |
|-----|-----------------------|----------------------------------------------------------------------------------------------------------------------------------------------------|---------------------------------------------|
| 98  | Coudray-Meunier, 2013 | Discrimination of infectious hepatitis A virus and rotavirus by combining dyes and surfactants with RT-qPCR.                                       | No data on HAV prevalence in water matrices |
| 99  | Courault, 2017        | Assessment and risk modeling of airborne enteric viruses emitted from wastewater reused for irrigation.                                            | No data on HAV prevalence in water matrices |
| 100 | Crance, 1998          | Effect of temperature on the survival of hepatitis A virus and its capsidal antigen in synthetic seawater.                                         | No data on HAV prevalence in water matrices |
| 101 | Craun, 1985           | A summary of waterborne illness transmitted through contaminated groundwater.                                                                      | No data on HAV prevalence in water matrices |
| 102 | Crilly, 2019          | Spatial and temporal analysis of Hepatitis A cases in fier district, Albania, 1986–2016.                                                           | No data on HAV prevalence in water matrices |
| 103 | Croci, 2000           | Determination of enteroviruses, hepatitis A virus, bacteriophages and Escherichia coli in Adriatic Sea mussels.                                    | No data on HAV prevalence in water matrices |
| 104 | Croci, 2007           | Assessment of human enteric viruses in shellfish from the northern Adriatic sea.                                                                   | No data on HAV prevalence in water matrices |
| 105 | Cruvinel, 2019        | Waterborne diseases in waste pickers of Estrutural, Brazil, the second largest open-air dumpsite in world.                                         | No data on HAV prevalence in water matrices |
| 106 | Cuevas-Ferrando, 2020 | Assessment of ISO Method 15216 to Quantify Hepatitis E Virus in Bottled Water.                                                                     | No data on HAV prevalence in water matrices |
| 107 | Cuevas-Ferrando, 2020 | HEV Occurrence in Waste and Drinking Water Treatment Plants.                                                                                       | No data on HAV prevalence in water matrices |
| 108 | D'Ugo, 2016           | Detection of Human Enteric Viruses in Freshwater from European Countries.                                                                          | No data on HAV prevalence in water matrices |
| 109 | D'Amico, 1978         | Epidemiological investigations on hepatitis A and B diffusion during an outbreak in a Sicilian town in conditions of high incidence of infections. | Article not in English or in French         |
| 110 | Davidkin, 2007        | Molecular epidemiology of hepatitis A in St. Petersburg, Russia, 1997-2003.                                                                        | No data on HAV prevalence in water matrices |
| 111 | De Abreu Corrêa, 2012 | Stability of human enteric viruses in seawater samples from mollusc depuration tanks coupled with ultraviolet irradiation.                         | No data on HAV prevalence in water matrices |
| 112 | De Leon, 1991         | Detection of rotaviruses in water by gene probes.                                                                                                  | No data on HAV prevalence in water matrices |
| 113 | Deng, 1974            | Detection of hepatitis A virus in environmental samples by antigen-capture PCR.                                                                    | Sample size < or = 10 participants          |
| 114 | Denis, 1980           | Control of virus contamination of water.                                                                                                           | Full text or abstract not found             |

|     |                   |                                                                                                                                                                                   |                                                |
|-----|-------------------|-----------------------------------------------------------------------------------------------------------------------------------------------------------------------------------|------------------------------------------------|
| 115 | Di Maria, 1981    | Epidemic outbreak of type A viral hepatitis in a town in the province of Florence (Rufina).                                                                                       | No data on HAV prevalence in water matrices    |
| 116 | Di Pasquale, 2010 | Comparison of different concentration methods for the detection of hepatitis A virus and calicivirus from bottled natural mineral waters.                                         | No data on HAV prevalence in water matrices    |
| 117 | Di Pinto, 2004    | A comparison of RT-PCR-based assays for the detection of HAV from shellfish.                                                                                                      | No data on HAV prevalence in water matrices    |
| 118 | Dilawari, 1994    | Hepatitis E virus: epidemiological, clinical and serological studies of north Indian epidemic.                                                                                    | No data on HAV prevalence in water matrices    |
| 119 | Ding, 1982        | An outbreak of water-borne infection by viral hepatitis A.                                                                                                                        | Article not in English or in French            |
| 120 | Divizia, 2008     | Sewage workers: Risk of acquiring enteric virus infections including Hepatitis A.                                                                                                 | No data on HAV prevalence in water matrices    |
| 121 | Divizia, 1989     | HAV recovery from tap water: evaluation of different types of membranes.                                                                                                          | No data on HAV prevalence in water matrices    |
| 122 | Divizia, 1989     | Isolation of wild-type hepatitis A virus from the environment.                                                                                                                    | Sample size < or = 10 participants             |
| 123 | Divizia, 2005     | Nucleotide correlation between HAV isolates from human patients and environmental samples.                                                                                        | Sample size < or = 10 participants             |
| 124 | Divizia, 1993     | Hepatitis A virus identification in an outbreak by enzymatic amplification.                                                                                                       | Sample size < or = 10 participants             |
| 125 | Dubois, 2007      | Detection and quantification by real-time RT-PCR of hepatitis A virus from inoculated tap waters, salad vegetables, and soft fruits: Characterization of the method performances. | No data on HAV prevalence in water matrices    |
| 126 | Dudarev, 2013     | Food and water security issues in Russia III: food- and waterborne diseases in the Russian Arctic, Siberia and the Far East, 2000-2011.                                           | Review                                         |
| 127 | Durmisević, 1998  | Status of the quality of drinking water provided to schools in the area of the Zenoj-Doboj Canton.                                                                                | Article not in English or in French            |
| 128 | Eifan, 2013       | Enteric viruses and aquatic environment.                                                                                                                                          | Review                                         |
| 129 | El Esnawy, 1998   | Detection of hepatitis E virus in greater Cairo two wastewater treatment plants and its prevalence among workers of these plants.                                                 | Full text or abstract not found                |
| 130 | El-Esnawy, 1998   | Detection of hepatitis E virus in greater Cairo. Two wastewater treatment plants and its prevalence among workers of these plants.                                                | No data on HAV prevalence in water matrices    |
| 131 | Elkana, 1996      | Study of the association between waterborne diseases and microbial water quality in Israel.                                                                                       | Review                                         |
| 132 | Elkana, 1983      | Detection of hepatitis A virus in sewage.                                                                                                                                         | Not possible to extract data on HAV prevalence |
| 133 | Elmahdy, 2022     | Detection of Norovirus and Hepatitis A Virus in Strawberry and Green Leafy Vegetables by Using RT-qPCR in Egypt.                                                                  | No data on HAV prevalence in water matrices    |
| 134 | El-Senousy, 2017  | Assessment and Evaluation of an Integrated Hybrid Anaerobic–Aerobic Sewage Treatment System for the Removal of Enteric Viruses.                                                   | No data on HAV prevalence in water matrices    |

|     |                       |                                                                                                                                                                 |                                             |
|-----|-----------------------|-----------------------------------------------------------------------------------------------------------------------------------------------------------------|---------------------------------------------|
| 135 | Enriquez, 1995        | Survival of the enteric adenoviruses 40 and 41 in tap, sea, and waste water.                                                                                    | No data on HAV prevalence in water matrices |
| 136 | Enriquez, 1992        | Accumulation and persistence of hepatitis A virus in mussels.                                                                                                   | No data on HAV prevalence in water matrices |
| 137 | Errezola Saizar, 1983 | Epidemiologic study of a water-borne outbreak of hepatitis A.                                                                                                   | Full text or abstract not found             |
| 138 | Espigares, 1999       | Detection of hepatitis A virus in wastewater.                                                                                                                   | Sample size < or = 10 participants          |
| 139 | Fang, 2017            | [Studies and application method and quality control system for detecting hepatitis A virus in water for fruits and vegetables production].                      | Article not in English or in French         |
| 140 | Farkas, 2017          | Evaluation of Two Triplex One-Step qRT-PCR Assays for the Quantification of Human Enteric Viruses in Environmental Samples.                                     | No data on HAV prevalence in water matrices |
| 141 | Farquhar, 1952        | Epidemic of viral hepatitis apparently spread by drinking water and by contact.                                                                                 | No data on HAV prevalence in water matrices |
| 142 | Fattal, 1983          | The prevalence of viral hepatitis and other enteric disease in communities utilizing wastewater in agriculture.                                                 | No data on HAV prevalence in water matrices |
| 143 | Fernandez-Cassi, 2018 | Metagenomics for the study of viruses in urban sewage as a tool for public health surveillance.                                                                 | No data on HAV prevalence in water matrices |
| 144 | Flehmg, 1988          | [Isolation of infectious hepatitis A viruses from clearing sludge].                                                                                             | Article not in English or in French         |
| 145 | Fongaro, 2015         | Human and animal enteric virus in groundwater from deep wells, and recreational and network water.                                                              | Sample size < or = 10 participants          |
| 146 | Fusco, 2019           | Detection of Hepatitis A Virus and Other Enteric Viruses in Shellfish Collected in the Gulf of Naples, Italy.                                                   | No data on HAV prevalence in water matrices |
| 147 | Gajardo, 1991         | Adsorption-elution with negatively and positively-charged glass powder for the concentration of hepatitis A virus from water.                                   | No data on HAV prevalence in water matrices |
| 148 | Gammie, 1997          | Does hepatitis A pose a significant health risk to recreational water users?                                                                                    | No data on HAV prevalence in water matrices |
| 149 | Gaon, 1975            | Evaluation of the secondary attack rate in families with viral hepatitis: a three year study in former year district of Sarajevo, Yugoslavia.                   | No data on HAV prevalence in water matrices |
| 150 | Gaon, 1982            | Characteristics of water-borne epidemics of viral hepatitis in Yugoslavia.                                                                                      | No data on HAV prevalence in water matrices |
| 151 | Gargano, 2017         | Mortality from selected diseases that can be transmitted by water - United States, 2003-2009.                                                                   | No data on HAV prevalence in water matrices |
| 152 | Garin, 1994           | Exposure to enteroviruses and hepatitis A virus among divers in environmental waters in France, first biological and serological survey of a controlled cohort. | No data on HAV prevalence in water matrices |

|     |                       |                                                                                                                                                                                                                          |                                                |
|-----|-----------------------|--------------------------------------------------------------------------------------------------------------------------------------------------------------------------------------------------------------------------|------------------------------------------------|
| 153 | Gavan, 1970           | An epidemic of waterborne infectious hepatitis in France.                                                                                                                                                                | No data on HAV prevalence in water matrices    |
| 154 | Geetharani, 2016      | Hepatitis A outbreak due to contaminated public water in Tiruchirappalli Corporation, Tamil Nadu, India, 2015.                                                                                                           | No data on HAV prevalence in water matrices    |
| 155 | Gerba, 1988           | Enteric virus: Risk assessment of ocean disposal of sewage sludge.                                                                                                                                                       | No data on HAV prevalence in water matrices    |
| 156 | Gerba, 1989           | Application of gene probes to virus detection in water.                                                                                                                                                                  | No data on HAV prevalence in water matrices    |
| 157 | Gerba, 1988           | Enterovirus detection in water with gene probes.                                                                                                                                                                         | No data on HAV prevalence in water matrices    |
| 158 | Getahun, 2015         | Hepatitis A outbreak in Ba subdivision, Fiji, October&#x2013;December 2013.                                                                                                                                              | No data on HAV prevalence in water matrices    |
| 159 | Gharbi-khelifi, 2007  | A 1-year study of the epidemiology of hepatitis A virus in Tunisia.                                                                                                                                                      | Not possible to extract data on HAV prevalence |
| 160 | Gilgen, 1997          | Three-step isolation method for sensitive detection of enterovirus, rotavirus, hepatitis A virus, and small round structured viruses in water samples.                                                                   | Sample size < or = 10 participants             |
| 161 | Girones, 1989         | Natural inactivation of enteric viruses in seawater.                                                                                                                                                                     | No data on HAV prevalence in water matrices    |
| 162 | Giwa, 2020            | Dissecting microbial community structure in sewage treatment plant for pathogens' detection using metagenomic sequencing technology.                                                                                     | No data on HAV prevalence in water matrices    |
| 163 | González-Saldía, 2019 | Fecal pollution source tracking and thalassogenic diseases: The temporal-spatial concordance between maximum concentrations of human mitochondrial DNA in seawater and Hepatitis A outbreaks among a coastal population. | No data on HAV prevalence in water matrices    |
| 164 | Goswami, 1993         | Detection of hepatitis A virus in Mercenaria mercenaria by coupled reverse transcription and polymerase chain reaction.                                                                                                  | No data on HAV prevalence in water matrices    |
| 165 | Gozlan, 2018          | Hepatitis A outbreak in men having sex with men in Israel 2017: Environmental and clinical surveillance.                                                                                                                 | No data on HAV prevalence in water matrices    |
| 166 | Grabow, 1983          | Inactivation of hepatitis A virus and indicator organisms in water by free chlorine residuals.                                                                                                                           | No data on HAV prevalence in water matrices    |
| 167 | Grabow, 1985          | Inactivation of hepatitis A virus, other enteric viruses and indicator organisms in water by chlorination.                                                                                                               | No data on HAV prevalence in water matrices    |
| 168 | Grabow, 1989          | Selection of indicator systems for human viruses in polluted seawater and shellfish.                                                                                                                                     | No data on HAV prevalence in water matrices    |
| 169 | Grabow, 1978          | Studies on the isolation and identification of hepatitis viruses in water.                                                                                                                                               | Not possible to extract data on HAV prevalence |

|     |                           |                                                                                                                                                                            |                                                |
|-----|---------------------------|----------------------------------------------------------------------------------------------------------------------------------------------------------------------------|------------------------------------------------|
| 170 | Graff, 1993               | Detection of hepatitis A virus in sewage sludge by antigen capture polymerase chain reaction.                                                                              | Sample size < or = 10 participants             |
| 171 | Green, 1995               | Enzymatic amplification of enteric viruses from wastewaters.                                                                                                               | No data on HAV prevalence in water matrices    |
| 172 | Green, 1999               | Comparative detection of enteric viruses in wastewaters, sediments and oysters by reverse transcription-PCR and cell culture.                                              | Not possible to extract data on HAV prevalence |
| 173 | Griffin, 2003             | Pathogenic human viruses in coastal waters.                                                                                                                                | Review                                         |
| 174 | Griffin, 1999             | Detection of viral pathogens by reverse transcriptase PCR and of microbial indicators by standard methods in the canals of the Florida Keys.                               | Not possible to extract data on HAV prevalence |
| 175 | Guajardo-Leiva, 2020      | Metagenomic insights into the sewage RNA virosphere of a large city.                                                                                                       | No data on HAV prevalence in water matrices    |
| 176 | Gupta, 2019               | Epidemiological investigation of an acute viral hepatitis outbreak in an urbanized rural area in a North Indian Union Territory.                                           | No data on HAV prevalence in water matrices    |
| 177 | Guzmán, 2015              | [Quality of water for human consumption and its association with morbimortality in Colombia, 2008-2012].                                                                   | No data on HAV prevalence in water matrices    |
| 178 | Hamner, 2006              | The role of water use patterns and sewage pollution in incidence of water-borne/enteric diseases along the Ganges River in Varanasi, India.                                | No data on HAV prevalence in water matrices    |
| 179 | Hau, 1999                 | Prevalence of enteric hepatitis A and E viruses in the Mekong River delta region of Vietnam.                                                                               | No data on HAV prevalence in water matrices    |
| 180 | Helcl, 1990               | Epidemics of water-borne viral hepatitis type A in the CR.                                                                                                                 | Full text or abstract not found                |
| 181 | Hellmér, 2014             | Detection of pathogenic viruses in sewage provided early warnings of hepatitis A virus and norovirus outbreaks.                                                            | No data on HAV prevalence in water matrices    |
| 182 | Hennechart-Collette, 2020 | Evaluation of three different filters and two methods for recovering viruses from drinking water.                                                                          | No data on HAV prevalence in water matrices    |
| 183 | Hennechart-Collette, 2021 | Detection of norovirus, hepatitis A and hepatitis E viruses in multicomponent foodstuffs.                                                                                  | No data on HAV prevalence in water matrices    |
| 184 | Hennechart-Collette, 2015 | Determination of which virus to use as a process control when testing for the presence of hepatitis A virus and norovirus in food and water.                               | No data on HAV prevalence in water matrices    |
| 185 | Herbold, 1989             | Comparison of ozone inactivation, in flowing water, of hepatitis A virus, poliovirus 1, and indicator organisms.                                                           | No data on HAV prevalence in water matrices    |
| 186 | Hernroth, 2002            | Environmental factors influencing human viral pathogens and their potential indicator organisms in the blue mussel, <i>Mytilus edulis</i> : The first Scandinavian report. | No data on HAV prevalence in water matrices    |
| 187 | Herwaldt, 1991            | Waterborne-disease outbreaks, 1989-1990.                                                                                                                                   | No data on HAV prevalence in water matrices    |

|     |                      |                                                                                                                                                                                                  |                                                |
|-----|----------------------|--------------------------------------------------------------------------------------------------------------------------------------------------------------------------------------------------|------------------------------------------------|
| 188 | Hewitt, 2006         | Effect of heat treatment on hepatitis A virus and norovirus in New Zealand Greenshell mussels ( <i>Perna canaliculus</i> ) by quantitative real-time reverse transcription PCR and cell culture. | No data on HAV prevalence in water matrices    |
| 189 | Hirani, 2013         | Characterization of effluent water qualities from satellite membrane bioreactor facilities.                                                                                                      | No data on HAV prevalence in water matrices    |
| 190 | Hossain, 2009        | Hepatitis E outbreak in a low income urban community in Bangladesh.                                                                                                                              | No data on HAV prevalence in water matrices    |
| 191 | Hrdy, 2021           | MOL-PCR and xMAP Technology: A Multiplex System for Fast Detection of Food- and Waterborne Viruses.                                                                                              | No data on HAV prevalence in water matrices    |
| 192 | Hughes, 1975         | Outbreaks of waterborne disease in the United States, 1973.                                                                                                                                      | No data on HAV prevalence in water matrices    |
| 193 | Huguet, 2012         | A comparison of different concentration methods for the detection of viruses present in bottled waters and those adsorbed to water bottle surfaces.                                              | No data on HAV prevalence in water matrices    |
| 194 | Imagawa, 2010        | Detection waterborne diseases associated viruses in the river water Metro Manila and Bulacan, the Philippines.                                                                                   | Not possible to extract data on HAV prevalence |
| 195 | Ishii, 2011          | Epidemiological and genetic analysis of a diffuse outbreak of hepatitis A in Japan, 2010.                                                                                                        | No data on HAV prevalence in water matrices    |
| 196 | Ishii, 2014          | Microfluidic quantitative PCR for simultaneous quantification of multiple viruses in environmental water samples.                                                                                | No data on HAV prevalence in water matrices    |
| 197 | Jaykus, 1993         | Application of RT-PCR for the detection of enteric viruses in oysters.                                                                                                                           | No data on HAV prevalence in water matrices    |
| 198 | Jean, 2001           | Detection of hepatitis A virus by the nucleic acid sequence-based amplification technique and comparison with reverse transcription-PCR.                                                         | No data on HAV prevalence in water matrices    |
| 199 | Jiang, 1986          | Detection of hepatitis A virus in seeded estuarine samples by hybridization with cDNA probes.                                                                                                    | No data on HAV prevalence in water matrices    |
| 200 | Jiang, 1987          | Detection of hepatitis A virus by hybridization with single-stranded RNA probes.                                                                                                                 | No data on HAV prevalence in water matrices    |
| 201 | Jiménez-Moleón, 2011 | Waterborne diseases in the state of Mexico, Mexico (2000-2005).                                                                                                                                  | No data on HAV prevalence in water matrices    |
| 202 | John, 2006           | Large outbreak of hepatitis A in Kerala [1].                                                                                                                                                     | No data on HAV prevalence in water matrices    |
| 203 | Jothikumar, 2010     | Development of an RNA extraction protocol for detection of waterborne viruses by reverse transcriptase quantitative PCR (RT-qPCR).                                                               | No data on HAV prevalence in water matrices    |
| 204 | Junaid, 2014         | Sanitary Survey of Drinking Water Quality in Plateau State, Nigeria.                                                                                                                             | No data on HAV prevalence in water matrices    |

|     |                   |                                                                                                                                                              |                                             |
|-----|-------------------|--------------------------------------------------------------------------------------------------------------------------------------------------------------|---------------------------------------------|
| 205 | Kaas, 2019        | Detection of Human Enteric Viruses in French Polynesian Wastewaters, Environmental Waters and Giant Clams.                                                   | Sample size < or = 10 participants          |
| 206 | Kadri, 2018       | Hepatitis A and E outbreak surveillance during 2015–2017 in Kashmir, India: Is the water to blame?                                                           | No data on HAV prevalence in water matrices |
| 207 | Kaevska, 2016     | Changes in Microbial Composition of Wastewater During Treatment in a Full-Scale Plant.                                                                       | No data on HAV prevalence in water matrices |
| 208 | Kanaaneh, 1995    | A Human Rights Approach for Access to Clean Drinking Water: A Case Study.                                                                                    | Case report                                 |
| 209 | Kankaria, 2020    | Epidemiological investigation of an outbreak of Acute Viral Hepatitis A and E in a semi-urban locality in Chandigarh, North Indian Union Territory, 2016-17. | No data on HAV prevalence in water matrices |
| 210 | Karasaki, 2012    | Hepatitis A virus contamination in the river and soil of Kitakyushu area in Japan.                                                                           | No data on HAV prevalence in water matrices |
| 211 | Katoch, 2016      | Outbreak investigation of acute viral hepatitis in Kangra valley, Himachal Pradesh, India, 2014-2015.                                                        | No data on HAV prevalence in water matrices |
| 212 | Katzenelson, 1976 | Risk of communicable disease infection associated with wastewater irrigation in agricultural settlements.                                                    | No data on HAV prevalence in water matrices |
| 213 | Kaur, 2017        | Hepatitis E virus: A leading cause of waterborne viral hepatitis in Northwest Districts of Punjab, India.                                                    | No data on HAV prevalence in water matrices |
| 214 | Khan, 2018        | Prevalent fecal contamination in drinking water resources and potential health risks in Swat, Pakistan.                                                      | No data on HAV prevalence in water matrices |
| 215 | Khan, 2007        | Environmental health indicators in New Zealand: Drinking water - A case study.                                                                               | No data on HAV prevalence in water matrices |
| 216 | Khan, 2014        | HAV in fresh vegetables: a hidden health risk in district Mardan, Pakistan.                                                                                  | No data on HAV prevalence in water matrices |
| 217 | Kim, 2006         | Detection of enteroviruses and mammalian reoviruses in Korean environmental waters.                                                                          | No data on HAV prevalence in water matrices |
| 218 | Kingsley, 2001    | Rapid and efficient extraction method for reverse transcription-PCR detection of hepatitis A and Norwalk-like viruses in shellfish.                          | No data on HAV prevalence in water matrices |
| 219 | Kingsley, 2003    | Persistence of hepatitis A virus in oysters.                                                                                                                 | No data on HAV prevalence in water matrices |
| 220 | Kojouharova, 2006 | Current outbreak of hepatitis A in Bulgaria, 2006.                                                                                                           | Review                                      |
| 221 | Kokkinos, 2017    | Virological Quality of Irrigation Water in Leafy Green Vegetables and Berry Fruits Production Chains.                                                        | No data on HAV prevalence in water matrices |
| 222 | Kokkinos, 2010    | Molecular characterization of hepatitis a virus isolates from environmental and clinical samples in Greece.                                                  | No data on HAV prevalence in water matrices |

|     |                       |                                                                                                                                                              |                                             |
|-----|-----------------------|--------------------------------------------------------------------------------------------------------------------------------------------------------------|---------------------------------------------|
| 223 | Kokkinos, 2011        | Molecular detection of multiple viral targets in untreated urban sewage from Greece.                                                                         | Duplicates                                  |
| 224 | Kollins, 1966         | The presence of human enteric viruses in sewage and their removal by conventional sewage treatment methods.                                                  | Review                                      |
| 225 | Komar, 1992           | Administration of water-soluble vitamins in viral hepatitis A.                                                                                               | No data on HAV prevalence in water matrices |
| 226 | Kotwal, 2014          | Environmental persistence and transfer of enteric viruses.                                                                                                   | Review                                      |
| 227 | Kovac, 2009           | A novel method for concentrating hepatitis A virus and caliciviruses from bottled water.                                                                     | No data on HAV prevalence in water matrices |
| 228 | Kozísek, 2009         | [Waterborne diseases outbreaks in the Czech Republic, 1995-2005].                                                                                            | No data on HAV prevalence in water matrices |
| 229 | Krasil'nikov, 1985    | [Isolation of viruses from water using porous silica].                                                                                                       | No data on HAV prevalence in water matrices |
| 230 | Kratochvil, 1998      | Quality assessment of drinking water in Prague in relation to the incidence of diarrhoeal diseases.                                                          | No data on HAV prevalence in water matrices |
| 231 | Kretschmer, 1972      | Water and sewage as transmission factors in viral hepatitis, demonstrated by practical examples.                                                             | Article not in English or in French         |
| 232 | Krikelis, 1985        | Detection of indigenous enteric viruses in raw sewage effluents of the city of Athens, Greece, during a two year survey.                                     | No data on HAV prevalence in water matrices |
| 233 | Kueh, 1989            | Recovery of viruses and bacteria in waters off Bondi beach: a pilot study.                                                                                   | No data on HAV prevalence in water matrices |
| 234 | Kukavica-Ibrulj, 2003 | Immunofluorescent detection and quantitation of hepatitis A virus in sewage treatment effluent and on agri-food surfaces using scanning confocal microscopy. | No data on HAV prevalence in water matrices |
| 235 | Kumar, 2016           | Hepatitis A outbreak associated with unsafe drinking water in a medical college student's hostel, New Delhi, India, 2014.                                    | No data on HAV prevalence in water matrices |
| 236 | Kumar, 2015           | Viral Hepatitis Surveillance--India, 2011-2013.                                                                                                              | Review                                      |
| 237 | La Bella, 2017        | Food-Borne Viruses in Shellfish: Investigation on Norovirus and HAV Presence in Apulia (SE Italy).                                                           | No data on HAV prevalence in water matrices |
| 238 | La Rosa, 2012         | Emerging and potentially emerging viruses in water environments.                                                                                             | Review                                      |
| 239 | Le Guyader, 2000      | Three-year study to assess human enteric viruses in shellfish.                                                                                               | No data on HAV prevalence in water matrices |
| 240 | Le Guyader, 1995      | Use of RT seminested PCR to assess viral contamination in caribbean rivers (martinique).                                                                     | No data on HAV prevalence in water matrices |
| 241 | Leblanc, 2019         | Persistence of murine norovirus, bovine rotavirus, and hepatitis A virus on stainless steel surfaces, in spring water, and on blueberries.                   | No data on HAV prevalence in water matrices |



|     |                       |                                                                                                                                                                  |                                                |
|-----|-----------------------|------------------------------------------------------------------------------------------------------------------------------------------------------------------|------------------------------------------------|
| 242 | Lee, 2013             | Development of a new cell culture-based method and optimized protocol for the detection of enteric viruses.                                                      | No data on HAV prevalence in water matrices    |
| 243 | Leisinger, 2013       | Use of silica as a carrier to recover and prepare waterborne enteric viruses for detection by RT-PCR.                                                            | No data on HAV prevalence in water matrices    |
| 244 | Leshchuk, 1996        | Concentration of hepatitis A and B virus antigens using water-soluble polymers.                                                                                  | No data on HAV prevalence in water matrices    |
| 245 | Lewis, 1988           | Polyethylene glycol precipitation for recovery of pathogenic viruses, including hepatitis A virus and human rotavirus, from oyster, water, and sediment samples. | No data on HAV prevalence in water matrices    |
| 246 | Li, 1998              | A new and simple method for concentration of enteric viruses from water.                                                                                         | No data on HAV prevalence in water matrices    |
| 247 | Li, 2009              | Detection of enteroviruses and hepatitis a virus in water by consensus primer multiplex RT-PCR.                                                                  | No data on HAV prevalence in water matrices    |
| 248 | Lin, 2019             | Concentration of hepatitis A virus from mimicked water samples by membrane filtration method.                                                                    | Article not in English or in French            |
| 249 | Linglof, 191          | An epidemic of water-borne hepatitis A.                                                                                                                          | Article not in English or in French            |
| 250 | Lipp, 2007            | Analysis of multiple enteric viral targets as sewage markers in coral reefs.                                                                                     | Not possible to extract data on HAV prevalence |
| 251 | López-Gálvez, 2016    | Occurrence of enteric viruses in reclaimed and surface irrigation water: relationship with microbiological and physicochemical indicators.                       | Not possible to extract data on HAV prevalence |
| 252 | Luksamijarulkul, 1994 | Microbiological quality of drinking water and using water of a Chao Phya River community, Bangkok.                                                               | No data on HAV prevalence in water matrices    |
| 253 | Lund, 1982            | Waterborne virus diseases.                                                                                                                                       | No data on HAV prevalence in water matrices    |
| 254 | Macaluso, 2021        | Occurrence of Human Enteric Viruses in Shellfish along the Production and Distribution Chain in Sicily, Italy.                                                   | No data on HAV prevalence in water matrices    |
| 255 | Maksimov, 2003        | [Indications of pathogenic viruses in water of Lake Baikal and its tributaries].                                                                                 | Article not in English or in French            |
| 256 | Mamontova, 2000       | [Viral pollution of drinking water in industrial towns of Eastern Siberia].                                                                                      | No data on HAV prevalence in water matrices    |
| 257 | Manja, 1982           | A simple field test for the detection of faecal pollution in drinking water.                                                                                     | No data on HAV prevalence in water matrices    |
| 258 | Manor, 2017           | Evidence for Hepatitis A virus endemic circulation in Israel despite universal toddlers' vaccination since 1999 and low clinical incidence in all age groups.    | No data on HAV prevalence in water matrices    |
| 259 | Manso, 2010           | Genotyping of hepatitis A virus detected in bivalve shellfish in Galicia (NW Spain).                                                                             | No data on HAV prevalence in water matrices    |

|     |                      |                                                                                                                                                    |                                                |
|-----|----------------------|----------------------------------------------------------------------------------------------------------------------------------------------------|------------------------------------------------|
| 260 | Marcos , 2014        | Detección del virus de la Hepatitis A en dos muestras de agua del Río Sechura, usando transcriptasa-reversa PCR en tiempo real.                    | Article not in English or in French            |
| 261 | Marie, 2017          | Viruses in the environment - presence and diversity of bacteriophage and enteric virus populations in the Umhlangane River, Durban, South Africa.  | No data on HAV prevalence in water matrices    |
| 262 | Martínez Amate, 2010 | Acute toxic hepatitis due to drinking water.                                                                                                       | No data on HAV prevalence in water matrices    |
| 263 | Masciopinto, 2019    | Human health risk assessment for the occurrence of enteric viruses in drinking water from wells: Role of flood runoff injections.                  | No data on HAV prevalence in water matrices    |
| 264 | Masciopinto, 2011    | Analytical solution for the modeling of the natural time-dependent reduction of waterborne viruses injected into fractured aquifers.               | No data on HAV prevalence in water matrices    |
| 265 | Masclaux, 2014       | Assessment of airborne virus contamination in wastewater treatment plants.                                                                         | No data on HAV prevalence in water matrices    |
| 266 | Mayr, 1980           | Viruses in drinking water - an underestimated danger?                                                                                              | Article not in English or in French            |
| 267 | McCall, 2020         | Identification of multiple potential viral diseases in a large urban center using wastewater surveillance.                                         | Not possible to extract data on HAV prevalence |
| 268 | McCall, 2021         | Assessment of enteric viruses during a hepatitis outbreak in Detroit MI using wastewater surveillance and metagenomic analysis.                    | No data on HAV prevalence in water matrices    |
| 269 | Meinick, 1982        | Viruses in surface and drinking waters.                                                                                                            | Review                                         |
| 270 | Melnick, 1978        | Viruses in water.                                                                                                                                  | No data on HAV prevalence in water matrices    |
| 271 | Mendelson, 2015      | Endemic circulation of hepatitis a virus in israel in spite of universal vaccination program evidenced by clinical and environmental surveillance. | No data on HAV prevalence in water matrices    |
| 272 | Meng, 2008           | Development of an extraction and concentration method for the detection of hepatitis A virus in different samples.                                 | No data on HAV prevalence in water matrices    |
| 273 | Metcalf, 1988        | Detection of hepatitis A virus in estuarine samples by gene probe assay.                                                                           | Review                                         |
| 274 | Metcalf, 1995        | Environmental virology: From detection of virus in sewage and water by isolation to identification by molecular biology - A trip of over 50 years. | Review                                         |
| 275 | Metcalf, 1972        | The occurrence of human viruses and coliphage in marine waters and shellfish.                                                                      | No data on HAV prevalence in water matrices    |
| 276 | Ming Yi, 1995        | Persistence of inoculated hepatitis A virus in mixed human and animal wastes.                                                                      | No data on HAV prevalence in water matrices    |
| 277 | Mirzaei, 2016        | Health-related Microbial Quality of Drinking Water in Kangavar, Western Iran.                                                                      | No data on HAV prevalence in water matrices    |

|     |                       |                                                                                                                                                                                     |                                             |
|-----|-----------------------|-------------------------------------------------------------------------------------------------------------------------------------------------------------------------------------|---------------------------------------------|
| 278 | Momba, 2009           | Survival of somatic and F-RNA coliphages in treated wastewater effluents and their impact on viral quality of the receiving water bodies in the Eastern Cape Province-South Africa. | No data on HAV prevalence in water matrices |
| 279 | Monceyron, 1994       | Detection of hepatitis A virus in clinical and environmental samples by immunomagnetic separation and PCR.                                                                          | No data on HAV prevalence in water matrices |
| 280 | Montuori, 2009        | Wastewater workers and hepatitis A virus infection.                                                                                                                                 | No data on HAV prevalence in water matrices |
| 281 | Moore, 1993           | Surveillance for waterborne disease outbreaks--United States, 1991-1992.                                                                                                            | No data on HAV prevalence in water matrices |
| 282 | Morace, 2002          | Microbial quality of wastewater: Detection of hepatitis A virus by reverse transcriptase-polymerase chain reaction.                                                                 | No data on HAV prevalence in water matrices |
| 283 | Moreno, 2009          | Phylogenetic analysis indicates human origin of rotavirus and hepatitis A virus strains found in the drinking water of western Colombia.                                            | Article not in English or in French         |
| 284 | Morgado, 1982         | An outbreak of hepatitis a apparently associated with use of contaminated water.                                                                                                    | Full text or abstract not found             |
| 285 | Mosley, 1937          | Infectious hepatitis; report of an outbreak probably caused by drinking water.                                                                                                      | No data on HAV prevalence in water matrices |
| 286 | Mphaka, 2016          | Hepatitis A virus outbreak in a compound in Tshwane district, Gauteng, South Africa: October 2014-March 2015.                                                                       | No data on HAV prevalence in water matrices |
| 287 | Murhekar, 2018        | Epidemiology of hepatitis a and Hepatitis E based on laboratory surveillance data-India, 2014-2017.                                                                                 | No data on HAV prevalence in water matrices |
| 288 | Muscillo, 1997        | Enteric virus detection in Adriatic seawater by cell culture, polymerase chain reaction and polyacrylamide gel electrophoresis.                                                     | No data on HAV prevalence in water matrices |
| 289 | Myrmel, 2006          | Enteric viruses in inlet and outlet samples from sewage treatment plants.                                                                                                           | No data on HAV prevalence in water matrices |
| 290 | Nabil-Ben-Salem, 2012 | Evolutionary pattern of 5'-UTR of enteroviruses and primer update for the detection of enteroviral RNA in environmental samples.                                                    | No data on HAV prevalence in water matrices |
| 291 | Nasheri, 2021         | Survival and Inactivation by Advanced Oxidative Process of Foodborne Viruses in Model Low-Moisture Foods.                                                                           | No data on HAV prevalence in water matrices |
| 292 | Nasser, 1994          | Prevalence and fate of hepatitis A virus in water.                                                                                                                                  | Review                                      |
| 293 | Nasser, 1991          | Detection of human rotaviruses in fresh and estuarine waters by dot-blot hybridization.                                                                                             | No data on HAV prevalence in water matrices |
| 294 | Nasser, 1999          | Quantitative assessment of the inactivation of pathogenic and indicator viruses in natural water sources.                                                                           | No data on HAV prevalence in water matrices |

|     |                     |                                                                                                                                                                                           |                                             |
|-----|---------------------|-------------------------------------------------------------------------------------------------------------------------------------------------------------------------------------------|---------------------------------------------|
| 295 | Nasser, 1993        | Comparative survival of E. coli, F+bacteriophages, HAV and poliovirus 1 in wastewater and groundwater.                                                                                    | No data on HAV prevalence in water matrices |
| 296 | Nechiporenko, 1986  | Use of natural sorbents for isolation of enteroviruses and hepatitis A virus from water bodies.                                                                                           | Article not in English or in French         |
| 297 | Nedachin, 2015      | WASTE WATERS AS THE RESERVOIR OF INTESTINAL ENTERIC VIRAL INFECTIONS.                                                                                                                     | Article not in English or in French         |
| 298 | Nedachin, 1993      | Effect of various chlorine doses on inactivation of hepatitis A virus in water.                                                                                                           | Article not in English or in French         |
| 299 | Nedachin, 1993      | [Rapid method for detecting hepatitis A virus antigen in the water].                                                                                                                      | Article not in English or in French         |
| 300 | Nieuwenhuijse, 2017 | Metagenomic sequencing for surveillance of food- and waterborne viral diseases.                                                                                                           | Review                                      |
| 301 | Nikiforov, 1974     | A water-borne outbreak of infectious hepatitis.                                                                                                                                           | Article not in English or in French         |
| 302 | Normann, 1995       | Molecular epidemiology of an outbreak of hepatitis A in Italy.                                                                                                                            | No data on HAV prevalence in water matrices |
| 303 | Novaković, 1983     | An epidemic of viral hepatitis A after consumption of mussels from polluted seawater.                                                                                                     | Article not in English or in French         |
| 304 | Oh, 2009            | Development of RT-PCR method to detect various human enteric viruses.                                                                                                                     | Article not in English or in French         |
| 305 | Okoh, 2010          | Inadequately treated wastewater as a source of human enteric viruses in the environment.                                                                                                  | Review                                      |
| 306 | Orive, 2020         | Early SARS-CoV-2 outbreak detection by sewage-based epidemiology.                                                                                                                         | Review                                      |
| 307 | Orlova, 2005        | Dynamics of viral hepatitis A morbidity in Minsk.                                                                                                                                         | Article not in English or in French         |
| 308 | Oshiki, 2018        | Microfluidic PCR amplification and MiSeq amplicon sequencing techniques for high-throughput detection and genotyping of human pathogenic RNA viruses in human feces, sewage, and oysters. | Sample size < or = 10 participants          |
| 309 | Palombi, 2001       | Tirane, Albania: Survey on drinking water quality and facilities.                                                                                                                         | No data on HAV prevalence in water matrices |
| 310 | Pan, 2015           | High-throughput screening assay for the environmental water samples using cellular response profiles.                                                                                     | No data on HAV prevalence in water matrices |
| 311 | Pana, 1987          | Isolation of hepatitis A virus from polluted river water on FRP/3 cells.                                                                                                                  | Sample size < or = 10 participants          |
| 312 | Park, 2010          | Human enteric viruses in groundwater.                                                                                                                                                     | No data on HAV prevalence in water matrices |
| 313 | Parshionikar, 2004  | Development of homologous viral internal controls for use in RT-PCR assays of waterborne enteric viruses.                                                                                 | No data on HAV prevalence in water matrices |
| 314 | Parshionikar, 2004  | Development of homologous viral internal controls for use in RT-PCR assays of waterborne enteric viruses.                                                                                 | No data on HAV prevalence in water matrices |

|     |                    |                                                                                                                                                   |                                                |
|-----|--------------------|---------------------------------------------------------------------------------------------------------------------------------------------------|------------------------------------------------|
| 315 | Patti, 1987        | Hepatitis A virus and poliovirus 1 inactivation in estuarine water.                                                                               | No data on HAV prevalence in water matrices    |
| 316 | Pavoni, 2022       | Detection of Hepatitis A Virus and Norovirus in Different Food Categories: A 6-Year Survey in Italy.                                              | No data on HAV prevalence in water matrices    |
| 317 | Peczenik, 1956     | An apparently water-borne outbreak of infectious hepatitis.                                                                                       | No data on HAV prevalence in water matrices    |
| 318 | Perelle, 2009      | Use of a robotic RNA purification protocol based on the NucliSens® easyMAG™ for real-time RT-PCR detection of hepatitis A virus in bottled water. | No data on HAV prevalence in water matrices    |
| 319 | Pérez-Méndez, 2014 | Concentration of enteric viruses from tap water using an anion exchange resin-based method.                                                       | No data on HAV prevalence in water matrices    |
| 320 | Phanuwan, 2006     | Monitoring of human enteric viruses and coliform bacteria in waters after urban flood in Jakarta, Indonesia.                                      | Not possible to extract data on HAV prevalence |
| 321 | Pietri, 1988       | Demonstration of hepatitis A virus (HAV) in sewage by immune electron microscopy.                                                                 | Full text or abstract not found                |
| 322 | Pietri, 1988       | Hepatitis A virus levels in shellfish exposed in a natural marine environment to the effluent from a treated sewage outfall.                      | Not possible to extract data on HAV prevalence |
| 323 | Pietri, 1987       | Detection of hepatitis A virus in experimentally contaminated seawater using a radio-immunological test: Sensitivity of the method.               | No data on HAV prevalence in water matrices    |
| 324 | Pinheiro, 2015     | INTERMEDIATE ENDEMICITY OF HEPATITIS A VIRUS INFECTION IN RURAL SETTLEMENT PROJECTS OF SOUTHWEST GOIÁS, BRAZIL.                                   | No data on HAV prevalence in water matrices    |
| 325 | Polo, 2018         | Hepatitis A Virus Disinfection in Water by Solar Photo-Fenton Systems.                                                                            | No data on HAV prevalence in water matrices    |
| 326 | Pommepuy, 2011     | Monitoring and modeling the microbiological quality of water and shellfish.                                                                       | Review                                         |
| 327 | Pontrelli, 2008    | Epidemiological and virological characterization of a large community-wide outbreak of hepatitis A in southern Italy.                             | No data on HAV prevalence in water matrices    |
| 328 | Poonawagul, 1995   | Outbreak of hepatitis A in a college traced to contaminated water reservoir in cafeteria.                                                         | No data on HAV prevalence in water matrices    |
| 329 | Prado, 2013        | The efficiency of concentration methods used to detect enteric viruses in anaerobically digested sludge.                                          | No data on HAV prevalence in water matrices    |
| 330 | Prado, 2014        | Detection of enteric viruses in activated sludge by feasible concentration methods.                                                               | No data on HAV prevalence in water matrices    |
| 331 | Prado, 2013        | The efficiency of concentration methods used to detect enteric viruses in anaerobically digested sludge.                                          | No data on HAV prevalence in water matrices    |
| 332 | Prevot, 1993       | Detection of human hepatitis A virus in environmental water by an antigen-capture polymerase chain reaction method.                               | No data on HAV prevalence in water matrices    |

|     |                  |                                                                                                                                           |                                                |
|-----|------------------|-------------------------------------------------------------------------------------------------------------------------------------------|------------------------------------------------|
| 333 | Prez, 2018       | Tracking enteric viruses in green vegetables from central Argentina: potential association with viral contamination of irrigation waters. | No data on HAV prevalence in water matrices    |
| 334 | Primavesi, 1963  | Virus infections and their significance in water hygiene.                                                                                 | Article not in English or in French            |
| 335 | Purnell, 2016    | Removal of phages and viral pathogens in a full-scale MBR: Implications for wastewater reuse and potable water.                           | No data on HAV prevalence in water matrices    |
| 336 | Purpari, 2018    | Detection of human enteric viruses from shellfish, vegetable and water samples collected in Sicily.                                       | Duplicates                                     |
| 337 | Pusch, 2005      | Detection of enteric viruses and bacterial indicators in German environmental waters.                                                     | Not possible to extract data on HAV prevalence |
| 338 | Puvacić, 1977    | Epidemiological and clinical circumstances of contracting viral hepatitis through drinking water.                                         | Article not in English or in French            |
| 339 | Qiao, 2016       | Comparison of concentration methods for detection of hepatitis A virus in water samples.                                                  | No data on HAV prevalence in water matrices    |
| 340 | Qing-Ling, 2008  | Development of an extraction and concentration method for the detection of hepatitis A virus in different samples.                        | No data on HAV prevalence in water matrices    |
| 341 | Rakesh, 2014     | Investigating a community-wide outbreak of hepatitis a in India.                                                                          | No data on HAV prevalence in water matrices    |
| 342 | Rakesh, 2018     | Investigating a community wide outbreak of hepatitis A in Kerala, India.                                                                  | No data on HAV prevalence in water matrices    |
| 343 | Ramia, 1985      | Transmission of viral infections by the water route: implications for developing countries.                                               | No data on HAV prevalence in water matrices    |
| 344 | Randazzo, 2019   | Interlaboratory Comparative Study to Detect Potentially Infectious Human Enteric Viruses in Influent and Effluent Waters.                 | No data on HAV prevalence in water matrices    |
| 345 | Randazzo, 2017   | Improving efficiency of viability-qPCR for selective detection of infectious HAV in food and water samples.                               | No data on HAV prevalence in water matrices    |
| 346 | Randel, 1962     | Infectious hepatitis: a waterborne outbreak at an air base in France.                                                                     | No data on HAV prevalence in water matrices    |
| 347 | Rao, 1981        | Detection of viruses in drinking water by concentration on magnetic iron oxide.                                                           | No data on HAV prevalence in water matrices    |
| 348 | Rao , 1986       | Human viruses in sediments, sludges, and soils.                                                                                           | No data on HAV prevalence in water matrices    |
| 349 | Raveendran, 2016 | Investigation of an Outbreak of Hepatitis A in a Coastal Area, Kerala, Southern India.                                                    | No data on HAV prevalence in water matrices    |
| 350 | Rawal, 1964      | EPIDEMIOLOGY OF WATER BORNE INFECTIOUS HEPATITIS IN A LOCALITY IN POONA.                                                                  | Full text or abstract not found                |

|     |                            |                                                                                                                                                 |                                             |
|-----|----------------------------|-------------------------------------------------------------------------------------------------------------------------------------------------|---------------------------------------------|
| 351 | Reynolds, 2001             | ICC/PCR detection of enteroviruses and hepatitis A virus in environmental samples.                                                              | No data on HAV prevalence in water matrices |
| 352 | Rigotto, 2009              | Evaluation of HA negatively charged membranes in the recovery of human adenoviruses and hepatitis A virus in different water matrices.          | No data on HAV prevalence in water matrices |
| 353 | Rohayem, 2006              | Assessing the risk of transmission of viral diseases in flooded areas: Viral load of the river Elbe in Dresden during the flood of August 2002. | No data on HAV prevalence in water matrices |
| 354 | Romalde, 1996              | New molecular methods for the detection of hepatitis A and Norwalk viruses in shellfish.                                                        | No data on HAV prevalence in water matrices |
| 355 | Rose, 2006                 | Quantitation of hepatitis A virus and enterovirus levels in the lagoon canals and Lido beach of Venice, Italy, using real-time RT-PCR.          | No data on HAV prevalence in water matrices |
| 356 | Rosenberg, 1980            | The risk of acquiring hepatitis from sewage-contaminated water.                                                                                 | No data on HAV prevalence in water matrices |
| 357 | Rowe, 2009                 | Hepatitis a outbreak epidemiologically linked to a food handler in Melbourne, Victoria.                                                         | No data on HAV prevalence in water matrices |
| 358 | Ruchusatsawat , 2016       | An Outbreak of Acute Hepatitis Caused by Genotype IB Hepatitis A Viruses Contaminating the Water Supply in Thailand.                            | No data on HAV prevalence in water matrices |
| 359 | Rumler, 2000               | Prevalence of hepatitis A in sewage and drain pipe constructors.                                                                                | No data on HAV prevalence in water matrices |
| 360 | Rusinol, 2020              | Microbiological contamination of conventional and reclaimed irrigation water: Evaluation and management measures.                               | No data on HAV prevalence in water matrices |
| 361 | Rusinol, 2020              | Metagenomic analysis of viruses, bacteria and protozoa in irrigation water.                                                                     | No data on HAV prevalence in water matrices |
| 362 | Ryu, 2019                  | Hepatitis a virus infection from a contaminated tap of ground water facility in a Neighborhood Park, Republic of Korea.                         | No data on HAV prevalence in water matrices |
| 363 | Rzezutka, 2004             | Survival of human enteric viruses in the environment and food.                                                                                  | Review                                      |
| 364 | Salcerini-Pierangeli, 1966 | Epidemiological aspects of viral hepatitis in the Upper Valley of the Tiber River.                                                              | No data on HAV prevalence in water matrices |
| 365 | Schastnyi, 1988            | Multiyear and seasonal hepatitis A morbidity in different population age groups in certain areas.                                               | No data on HAV prevalence in water matrices |
| 366 | Schlenker, 1999            | Incidence rates of hepatitis A by ZIP code area, Salt Lake County, Utah, 1992-1996.                                                             | No data on HAV prevalence in water matrices |
| 367 | Schindwein, 2009           | Comparative study of two extraction methods for enteric virus recovery from sewage sludge by molecular methods.                                 | No data on HAV prevalence in water matrices |

|     |                            |                                                                                                                                                                                                                                        |                                                    |
|-----|----------------------------|----------------------------------------------------------------------------------------------------------------------------------------------------------------------------------------------------------------------------------------|----------------------------------------------------|
| 368 | Schlosser, 1995            | Viral hepatitis A and exposure to sewage: a confirmed occupational risk.                                                                                                                                                               | Full text or abstract not found                    |
| 369 | Schnattinger, 1985         | Detection of hepatitis A virus in drinking water by enzyme-immunoassay using ultracentrifugation for virus concentration.                                                                                                              | Selection of samples with already HAV result known |
| 370 | Schultz, 2011              | Collaborative validation of a rapid method for efficient virus concentration in bottled water.                                                                                                                                         | No data on HAV prevalence in water matrices        |
| 371 | Schuster, 2005             | Infectious disease outbreaks related to drinking water in Canada, 1974-2001.                                                                                                                                                           | No data on HAV prevalence in water matrices        |
| 372 | Schwab, 1993               | Development of PCR methods for enteric virus detection in water.                                                                                                                                                                       | No data on HAV prevalence in water matrices        |
| 373 | Schwab, 1995               | Concentration and purification of beef extract mock eluates from water samples for the detection of enteroviruses, hepatitis A virus, and Norwalk virus by reverse transcription-PCR.                                                  | No data on HAV prevalence in water matrices        |
| 374 | Scoglio, 1989              | Water quality and microbiological status of the distribution system: traditional parameters and emerging parameters.                                                                                                                   | No data on HAV prevalence in water matrices        |
| 375 | Sedmak, 2005               | Nine-year study of the occurrence of culturable viruses in source water for two drinking water treatment plants and the influent and effluent of a wastewater treatment plant in Milwaukee, Wisconsin (August 1994 through July 2003). | No data on HAV prevalence in water matrices        |
| 376 | Sedyaningsih-Mamahit, 2002 | First documented outbreak of hepatitis E virus transmission in Java, Indonesia.                                                                                                                                                        | No data on HAV prevalence in water matrices        |
| 377 | Shahin, 2018               | Hepatitis A outbreak traced back to ice used in fruit juice in Nellikuzhi panchayat, Ernakulam district, Kerala state.                                                                                                                 | No data on HAV prevalence in water matrices        |
| 378 | Shasheen, 2022             | Quantitative RT-PCR detection of human noroviruses and hepatitis A virus in fresh produce and surface water used for irrigation in the Mansoura and Giza regions, Egypt.                                                               | No data on HAV prevalence in water matrices        |
| 379 | Shieh, 1991                | Detection of hepatitis A virus and other enteroviruses in water by ssRNA probes.                                                                                                                                                       | No data on HAV prevalence in water matrices        |
| 380 | Shin, 2017                 | A waterborne outbreak involving hepatitis A virus genotype IA at a residential facility in the Republic of Korea in 2015.                                                                                                              | Not possible to extract data on HAV prevalence     |
| 381 | Shuval, 2003               | Estimating the global burden of thalassogenic diseases: human infectious diseases caused by wastewater pollution of the marine environment.                                                                                            | Review                                             |
| 382 | Sidenko, 1962              | Data on detecting antigens (viruses) in water after washing the hands.                                                                                                                                                                 | Article not in English or in French                |
| 383 | Sidhu, 2013                | Sewage pollution in urban stormwater runoff as evident from the widespread presence of multiple microbial and chemical source tracking markers.                                                                                        | No data on HAV prevalence in water matrices        |
| 384 | Sincero, 2006              | Detection of hepatitis A virus (HAV) in oysters ( <i>Crassostrea gigas</i> ).                                                                                                                                                          | No data on HAV prevalence in water matrices        |



|     |                       |                                                                                                                                                               |                                                |
|-----|-----------------------|---------------------------------------------------------------------------------------------------------------------------------------------------------------|------------------------------------------------|
| 385 | Sinclair, 2009        | Viruses in recreational water-borne disease outbreaks: A review.                                                                                              | Review                                         |
| 386 | Singh, 2021           | Microbiological status of drinking water sources and its relationship with human health in Solan, India.                                                      | No data on HAV prevalence in water matrices    |
| 387 | Singh, 2006           | Epidemiological investigation of an outbreak of viral hepatitis.                                                                                              | No data on HAV prevalence in water matrices    |
| 388 | Smith, 1979           | Viruses in water.                                                                                                                                             | Editorial                                      |
| 389 | Sobsey, 1985          | Evaluation of methods for concentrating hepatitis A virus from drinking water.                                                                                | No data on HAV prevalence in water matrices    |
| 390 | Sobsey, 1985          | Detection of hepatitis A virus (HAV) in drinking water.                                                                                                       | No data on HAV prevalence in water matrices    |
| 391 | Sobsey, 1991          | Comparative inactivation of hepatitis A virus and other enteroviruses in water by iodine.                                                                     | No data on HAV prevalence in water matrices    |
| 392 | Sorensen, 2021        | Seasonality of enteric viruses in groundwater-derived public water sources.                                                                                   | Not possible to extract data on HAV prevalence |
| 393 | Soule, 2000           | Ultrafiltration and reverse transcription-polymerase chain reaction: An efficient process for poliovirus, rotavirus and hepatitis A virus detection in water. | No data on HAV prevalence in water matrices    |
| 394 | Souza, 2012           | Evaluation of tropical water sources and mollusks in southern Brazil using microbiological, biochemical, and chemical parameters.                             | Sample size < or = 10 participants             |
| 395 | Souza, 2018           | Low occurrence of Hepatitis A virus in water samples from an urban area of Southern Brazil.                                                                   | No data on HAV prevalence in water matrices    |
| 396 | Sowmyanarayanan, 2008 | Investigation of a hepatitis A outbreak in children in an urban slum in Vellore, Tamil Nadu, using geographic information systems.                            | No data on HAV prevalence in water matrices    |
| 397 | Springthorpe, 2001    | Comparison of static and dynamic disinfection models for bacteria and viruses in water of varying quality.                                                    | No data on HAV prevalence in water matrices    |
| 398 | Springthorpe, 1993    | In situ survival of indicator bacteria, MS-2 phage and human pathogenic viruses in river water.                                                               | No data on HAV prevalence in water matrices    |
| 399 | Sree Kalpana, 2016    | Hepatitis E outbreak among factory workers due to contaminated factory water, Mandya District, Karnataka, India, 2015.                                        | No data on HAV prevalence in water matrices    |
| 400 | Straub, 1994          | Detection of naturally occurring enteroviruses and hepatitis A virus in undigested and anaerobically digested sludge using the polymerase chain reaction.     | Sample size < or = 10 participants             |
| 401 | Subrahmanyam, 1977    | Persistence of enteroviruses in sewage sludge.                                                                                                                | No data on HAV prevalence in water matrices    |
| 402 | Suffredini, 2008      | Occurrence of enteric viruses in shellfish and relation to climatic-environmental factors.                                                                    | No data on HAV prevalence in water matrices    |

|     |                      |                                                                                                                                                                         |                                             |
|-----|----------------------|-------------------------------------------------------------------------------------------------------------------------------------------------------------------------|---------------------------------------------|
| 403 | Sundkvist, 2000      | Outbreak of hepatitis A spread by contaminated drinking glasses in a public house.                                                                                      | No data on HAV prevalence in water matrices |
| 404 | Sutmoller, 1982      | A water-borne hepatitis A outbreak in Rio de Janeiro.                                                                                                                   | No data on HAV prevalence in water matrices |
| 405 | Symonds, 2009        | Eukaryotic viruses in wastewater samples from the United States.                                                                                                        | No data on HAV prevalence in water matrices |
| 406 | Tani, 1992           | Enteric virus levels in river water.                                                                                                                                    | No data on HAV prevalence in water matrices |
| 407 | Tauil, 2010          | Hepatitis A outbreak in an urban area of Luziânia, state of Goiás, Brazil, 2009.                                                                                        | Article not in English or in French         |
| 408 | Taylor, 1995         | A serosurvey of water-borne pathogens amongst canoeists in South Africa.                                                                                                | No data on HAV prevalence in water matrices |
| 409 | Telniceanu, 1971     | Epidemiological aspects of viral hepatitis. Living conditions and water transmission.                                                                                   | Full text or abstract not found             |
| 410 | Thornton, 1995       | The risk of hepatitis A from sewage contamination of a water supply.                                                                                                    | No data on HAV prevalence in water matrices |
| 411 | Torok, 2021          | Investigation of F-RNA Bacteriophage as a Tool in Re-Opening Australian Oyster Growing Areas Following Sewage Spills.                                                   | No data on HAV prevalence in water matrices |
| 412 | Tripathy, 2019       | Study of a hepatitis E virus outbreak involving drinking water and sewage contamination in Shimla, India, 2015-2016.                                                    | Sample size < or = 10 participants          |
| 413 | Tripathy, 2021       | An outbreak of hepatitis E in Yavatmal, India, 2019.                                                                                                                    | Sample size < or = 10 participants          |
| 414 | Trudel-Ferland, 2021 | Persistence of Hepatitis A Virus RNA in Water, on Non-porous Surfaces, and on Blueberries.                                                                              | No data on HAV prevalence in water matrices |
| 415 | Tsai, 1993           | Simple method of concentrating enteroviruses and hepatitis A virus from sewage and ocean water for rapid detection by reverse transcriptase- polymerase chain reaction. | Sample size < or = 10 participants          |
| 416 | Tsai, 1994           | Detection of poliovirus, hepatitis A virus, and rotavirus from sewage and ocean water by triplex reverse transcriptase PCR.                                             | Sample size < or = 10 participants          |
| 417 | Tulchinsky, 2000     | Safety of community drinking-water and outbreaks of waterborne enteric disease: Israel, 1976-97.                                                                        | No data on HAV prevalence in water matrices |
| 418 | Umesha, 2008         | Prevalence of human pathogenic enteric viruses in bivalve molluscan shellfish and cultured shrimp in south west coast of India.                                         | No data on HAV prevalence in water matrices |
| 419 | Upfold, 2021         | Occurrence of Human Enteric Viruses in Water Sources and Shellfish: A Focus on Africa.                                                                                  | Review                                      |
| 420 | Vasil'ev, 2006       | The evaluation of contamination of water objects with hepatitis A virus (HAV) and the impact of HAV on morbidity trends in large seaports of the Ukraine.               | Article not in English or in French         |
| 421 | Venugopalan, 2004    | Hepatitis A outbreak in Hulu Langat District, Selangor State, Malaysia during April--October 2002.                                                                      | No data on HAV prevalence in water matrices |

|     |                   |                                                                                                                                                  |                                             |
|-----|-------------------|--------------------------------------------------------------------------------------------------------------------------------------------------|---------------------------------------------|
| 422 | Vilim, 1977       | Viral hepatitis A: water epidemic in a bungalow community (Czech).                                                                               | Article not in English or in French         |
| 423 | Villamizar, 2021  | Identification of enteric viruses from raw water using fluoro-immuno-magnetic separation coupled to RT-PCR.                                      | No data on HAV prevalence in water matrices |
| 424 | Villar, 2002      | Hepatitis A Outbreak in a Public School in Rio de Janeiro, Brazil.                                                                               | No data on HAV prevalence in water matrices |
| 425 | Villar, 2006      | Evaluation of methods used to concentrate and detect hepatitis A virus in water samples.                                                         | Sample size < or = 10 participants          |
| 426 | Vishwakarma, 2021 | Aptamer-based approaches for the detection of waterborne pathogens.                                                                              | Review                                      |
| 427 | Vonstille, 1993   | Hepatitis A epidemics from utility sewage in Ocoee, Florida.                                                                                     | No data on HAV prevalence in water matrices |
| 428 | Wallender, 2014   | Contributing factors to disease outbreaks associated with untreated groundwater.                                                                 | No data on HAV prevalence in water matrices |
| 429 | Walter, 1985      | Interactions between biotic and abiotic factors and viruses in a water system.                                                                   | No data on HAV prevalence in water matrices |
| 430 | Wang, 2018        | Differential removal of human pathogenic viruses from sewage by conventional and ozone treatments.                                               | No data on HAV prevalence in water matrices |
| 431 | Wanke, 1987       | Viral hepatitis and gastroenteritis transmitted by shellfish and water.                                                                          | Review                                      |
| 432 | Warlen, 1998      | Hepatitis A in waste water treatment plant workers: Is vaccination necessary? [2].                                                               | Full text or abstract not found             |
| 433 | Weldon, 2000      | Prevalence of antibody to hepatitis a virus in drinking water workers and wastewater workers in Texas from 1996 to 1997.                         | No data on HAV prevalence in water matrices |
| 434 | Whatley, 1968     | A waterborne outbreak of infectious hepatitis in a small Maryland town.                                                                          | No data on HAV prevalence in water matrices |
| 435 | Williamson, 2011  | Enteric viruses in New Zealand drinking-water sources.                                                                                           | No data on HAV prevalence in water matrices |
| 436 | Yang, 1993        | A new method of RNA preparation for detection of hepatitis A virus in environmental samples by the polymerase chain reaction.                    | No data on HAV prevalence in water matrices |
| 437 | Yang, 2011        | Major human Hepatitis A virus genotype in Hong Kong marine waters and detection by real-time PCR.                                                | Sample size < or = 10 participants          |
| 438 | Yassin, 2006      | Assessment of microbiological water quality and its relation to human health in Gaza Governorate, Gaza Strip.                                    | No data on HAV prevalence in water matrices |
| 439 | Ye-Qing, 2012     | An outbreak of hepatitis A associated with a contaminated well in a middle school, Guangxi, China.                                               | No data on HAV prevalence in water matrices |
| 440 | Yoder, 2008       | Surveillance for waterborne disease and outbreaks associated with drinking water and water not intended for drinking-- United States, 2005-2006. | No data on HAV prevalence in water matrices |

|     |               |                                                                                                                                           |                                             |
|-----|---------------|-------------------------------------------------------------------------------------------------------------------------------------------|---------------------------------------------|
| 441 | Yoon, 2009    | Epidemiological and virological characterization of a community outbreak of hepatitis A: Hospital-based case control study.               | No data on HAV prevalence in water matrices |
| 442 | Yousuf, 2014  | Survey of Gram Negative and Gram Positive Bacteria in Drinking Water Supplies in Karachi, Pakistan.                                       | No data on HAV prevalence in water matrices |
| 443 | Yue, 1993     | Pollution of Inshore Seawater and Shellfish Due to Hepatitis A Virus in Liaoning Province.                                                | Full text or abstract not found             |
| 444 | Zak, 1988     | Evaluation of the role of a water factor in the seasonal incidence of hepatitis A.                                                        | Article not in English or in French         |
| 445 | Zhang, 2009   | An outbreak of hepatitis A in recently vaccinated students from ice snacks made from contaminated well water.                             | No data on HAV prevalence in water matrices |
| 446 | Zhang, 2009   | Detection and quantification of hepatitis a virus in Tianjin Coastal Seawater of Bohai Bay.                                               | Article not in English or in French         |
| 447 | Zhenzhu, 1993 | Drinking Water Quality and Intestinal Infectious Diseases in Urban and Rural Boarding Schools in Guangxi.                                 | Full text or abstract not found             |
| 448 | Zhou, 1991    | Concentration and detection of hepatitis A virus and rotavirus from shellfish by hybridization tests.                                     | No data on HAV prevalence in water matrices |
| 449 | Zlobina, 1993 | The role of the water factor of transmission in the spread of viral hepatitis A and dysentery under the conditions in an industrial city. | Article not in English or in French         |
| 450 | Zoni, 2006    | [Integrate cell culture--PCR (ICC/PCR) in viruses researches in environmental and food samples. Note I].                                  | Article not in English or in French         |

**Table S4:** Characteristics of included studies

| Characteristics                                      | Overall<br>n=200 (%)       | Untreated<br>wastewater<br>n=56 (%) | Treated<br>wastewater<br>n=34 (%)          | Surface water<br>n=66 (%)              | Drinking water<br>n=11 (%) | Groundwater<br>r n=12 (%) | Others<br>n=21 (%)                            |
|------------------------------------------------------|----------------------------|-------------------------------------|--------------------------------------------|----------------------------------------|----------------------------|---------------------------|-----------------------------------------------|
| <b>Year of publication; range</b>                    | 1987-2022                  | 1991-2021                           | 1993-2021                                  | 1987-2021                              | 1995-2019                  | 1999-2022                 | 2000-2021                                     |
| <b>Period of sampling; range</b>                     | 1986-2020                  | 1996-2018                           | 2004-2018                                  | 1986-2020                              | 1991-2017                  | 1995-2014                 | 1998-2019                                     |
| <b>Starting volume for concentration (mL); range</b> | 16.5-1000000               | 20-20000                            | 16.5-20000                                 | 100-20000                              | 1000-1000000               | 1500-100000               | 100-10000                                     |
| <b>Concentration data (genome copies /L); range</b>  | <1 to 3.7×10 <sup>10</sup> | <1 to 3.7×10 <sup>10</sup>          | 2.3×10 <sup>1</sup> to 3.3×10 <sup>7</sup> | 1.5×10 <sup>1</sup> to 10 <sup>7</sup> |                            |                           | 6.87×10 <sup>-1</sup> to 7.4×10 <sup>-1</sup> |
| <b>Sampling</b>                                      |                            |                                     |                                            |                                        |                            |                           |                                               |
| Non probabilistic                                    | 195 (97.5)                 | 56 (100)                            | 34 (100)                                   | 64 (97.0)                              | 11 (100)                   | 10 (83.3)                 | 20 (95.2)                                     |
| Probabilistic                                        | 5 (2.5)                    |                                     |                                            | 2 (3.0)                                |                            | 2 (16.7)                  | 1 (4.8)                                       |
| <b>Number of sites</b>                               |                            |                                     |                                            |                                        |                            |                           |                                               |
| Multicenter                                          | 130 (65.0)                 | 31 (55.4)                           | 22 (64.7)                                  | 53 (80.3)                              | 6 (54.6)                   | 8 (66.7)                  | 10 (47.6)                                     |
| Monocenter                                           | 69 (34.5)                  | 24 (42.9)                           | 12 (35.3)                                  | 13 (19.7)                              | 5 (45.5)                   | 4 (33.3)                  | 11 (52.4)                                     |
| Nationally representative                            | 1 (0.5)                    | 1 (1.8)                             |                                            |                                        |                            |                           |                                               |
| <b>Timing of samples collection</b>                  |                            |                                     |                                            |                                        |                            |                           |                                               |
| Prospectively                                        | 197 (98.5)                 | 55 (98.2)                           | 33 (97.1)                                  | 66 (100)                               | 11 (100)                   | 12 (100)                  | 20 (95.2)                                     |
| Retrospectively                                      | 2 (1.0)                    |                                     | 1 (2.9)                                    |                                        |                            |                           | 1 (4.8)                                       |
| Retrospectively                                      | 1 (0.5)                    | 1 (1.8)                             |                                            |                                        |                            |                           |                                               |
| <b>Countries</b>                                     |                            |                                     |                                            |                                        |                            |                           |                                               |
| Italy                                                | 29 (14.5)                  | 9 (16.1)                            | 7 (20.6)                                   | 9 (13.6)                               | 1 (9.1)                    | 2 (16.7)                  | 1 (4.8)                                       |
| Brazil                                               | 22 (11.0)                  | 5 (8.9)                             | 4 (11.8)                                   | 12 (18.2)                              | 1 (9.1)                    |                           |                                               |

| Characteristics          | Overall<br>n=200 (%) | Untreated<br>wastewater<br>n=56 (%) | Treated<br>wastewater<br>n=34 (%) | Surface water<br>n=66 (%) | Drinking water<br>n=11 (%) | Groundwater<br>r n=12 (%) | Others<br>n=21 (%) |
|--------------------------|----------------------|-------------------------------------|-----------------------------------|---------------------------|----------------------------|---------------------------|--------------------|
| United States of America | 17 (8.5)             | 2 (3.6)                             |                                   | 7 (10.6)                  |                            | 6 (50.0)                  | 2 (9.5)            |
| Spain                    | 14 (7.0)             | 8 (14.3)                            | 1 (2.9)                           | 3 (4.6)                   |                            |                           | 2 (9.5)            |
| South Africa             | 13 (6.5)             | 1 (1.8)                             | 5 (14.7)                          | 5 (7.6)                   | 1 (9.1)                    |                           | 1 (4.8)            |
| France                   | 11 (5.5)             | 4 (7.1)                             | 3 (8.8)                           | 3 (4.6)                   |                            |                           | 1 (4.8)            |
| South Korea              | 10 (5.0)             |                                     |                                   | 4 (6.1)                   | 1 (9.1)                    | 2 (16.7)                  | 3 (14.3)           |
| India                    | 9 (4.5)              | 4 (7.1)                             | 2 (5.9)                           | 1 (1.5)                   | 1 (9.1)                    | 1 (8.3)                   |                    |
| Tunisia                  | 9 (4.5)              | 3 (5.4)                             | 3 (8.8)                           |                           |                            |                           | 3 (14.3)           |
| Greece                   | 6 (3.0)              | 2 (3.6)                             | 1 (2.9)                           | 3 (4.6)                   |                            |                           |                    |
| Pakistan                 | 6 (3.0)              | 1 (1.8)                             |                                   | 2 (3.0)                   | 2 (18.2)                   |                           | 1 (4.8)            |
| Thailand                 | 6 (3.0)              | 1 (1.8)                             |                                   | 3 (4.6)                   | 2 (18.2)                   |                           |                    |
| Uganda                   | 5 (2.5)              | 1 (1.8)                             | 1 (2.9)                           | 2 (3.0)                   |                            |                           | 1 (4.8)            |
| Egypt                    | 4 (2.0)              | 2 (3.6)                             | 1 (2.9)                           | 1 (1.5)                   |                            |                           |                    |
| Argentina                | 3 (1.5)              | 1 (1.8)                             |                                   | 2 (3.0)                   |                            |                           |                    |
| Costa Rica               | 3 (1.5)              | 2 (3.6)                             | 1 (2.9)                           |                           |                            |                           |                    |
| Kenya                    | 3 (1.5)              | 2 (3.6)                             |                                   | 1 (1.5)                   |                            |                           |                    |
| Singapore                | 3 (1.5)              | 1 (1.8)                             | 1 (2.9)                           | 1 (1.5)                   |                            |                           |                    |
| Sweden                   | 3 (1.5)              | 1 (1.8)                             | 1 (2.9)                           |                           |                            |                           | 1 (4.8)            |
| United Kingdom           | 3 (1.5)              | 1 (1.8)                             | 1 (2.9)                           | 1 (1.5)                   |                            |                           |                    |
| Germany                  | 2 (1.0)              |                                     | 1 (2.9)                           | 1 (1.5)                   |                            |                           |                    |
| Israel                   | 2 (1.0)              | 2 (3.6)                             |                                   |                           |                            |                           |                    |
| Mexico                   | 2 (1.0)              |                                     |                                   | 2 (3.0)                   |                            |                           |                    |
| Bahrain                  | 1 (0.5)              |                                     |                                   |                           |                            |                           | 1 (4.8)            |
| Bosnia and Herzegovina   | 1 (0.5)              |                                     |                                   |                           | 1 (9.1)                    |                           |                    |
| Canada                   | 1 (0.5)              |                                     |                                   | 1 (1.5)                   |                            |                           |                    |
| Chad                     | 1 (0.5)              |                                     |                                   |                           |                            | 1 (8.3)                   |                    |
| Colombia                 | 1 (0.5)              |                                     |                                   |                           |                            |                           | 1 (4.8)            |
| Croatia                  | 1 (0.5)              |                                     |                                   |                           | 1 (9.1)                    |                           |                    |
| Iran                     | 1 (0.5)              |                                     |                                   |                           |                            |                           | 1 (4.8)            |
| Japan                    | 1 (0.5)              | 1 (1.8)                             |                                   |                           |                            |                           |                    |

| Characteristics        | Overall<br>n=200 (%) | Untreated<br>wastewater<br>n=56 (%) | Treated<br>wastewater<br>n=34 (%) | Surface water<br>n=66 (%) | Drinking water<br>n=11 (%) | Groundwater<br>r n=12 (%) | Others<br>n=21 (%) |
|------------------------|----------------------|-------------------------------------|-----------------------------------|---------------------------|----------------------------|---------------------------|--------------------|
| Jordan                 | 1 (0.5)              |                                     |                                   |                           |                            |                           | 1 (4.8)            |
| Morocco                | 1 (0.5)              |                                     |                                   |                           |                            |                           | 1 (4.8)            |
| New Caledonia (France) | 1 (0.5)              | 1 (1.8)                             |                                   |                           |                            |                           |                    |
| Philippines            | 1 (0.5)              |                                     |                                   | 1 (1.5)                   |                            |                           |                    |
| Saudi Arabia           | 1 (0.5)              | 1 (1.8)                             |                                   |                           |                            |                           |                    |
| Serbia                 | 1 (0.5)              |                                     |                                   | 1 (1.5)                   |                            |                           |                    |
| Slovenia               | 1 (0.5)              |                                     | 1 (2.9)                           |                           |                            |                           |                    |
|                        |                      |                                     |                                   |                           |                            |                           |                    |
| <b>WHO Region</b>      |                      |                                     |                                   |                           |                            |                           |                    |
| Europe                 | 74 (37.0)            | 27 (48.2)                           | 16 (47.1)                         | 21 (31.8)                 | 3 (27.3)                   | 2 (16.7)                  | 5 (23.8)           |
| America                | 49 (24.5)            | 10 (17.9)                           | 5 (14.7)                          | 24 (36.4)                 | 1 (9.1)                    | 6 (50.0)                  | 3 (14.3)           |
| Eastern Mediterranean  | 24 (12.0)            | 7 (12.5)                            | 4 (11.8)                          | 3 (4.6)                   | 2 (18.2)                   |                           | 8 (38.1)           |
| Africa                 | 22 (11.0)            | 4 (7.1)                             | 6 (17.7)                          | 8 (12.1)                  | 1 (9.1)                    | 1 (8.3)                   | 2 (9.5)            |
| South-East Asia        | 15 (7.5)             | 5 (8.9)                             | 2 (5.9)                           | 4 (6.1)                   | 3 (27.3)                   | 1 (8.3)                   |                    |
| Western Pacific        | 15 (7.5)             | 2 (3.6)                             | 1 (2.9)                           | 6 (9.1)                   | 1 (9.1)                    | 2 (16.7)                  | 3 (14.3)           |
| Unclear                | 1 (0.5)              | 1 (1.8)                             |                                   |                           |                            |                           |                    |
|                        |                      |                                     |                                   |                           |                            |                           |                    |
| <b>UNSD Region</b>     |                      |                                     |                                   |                           |                            |                           |                    |
| Southern Europe        | 53 (26.5)            | 19 (33.9)                           | 10 (29.4)                         | 16 (24.2)                 | 3 (27.3)                   | 2 (16.7)                  | 3 (14.3)           |
| South America          | 26 (13.0)            | 6 (10.7)                            | 4 (11.8)                          | 14 (21.2)                 | 1 (9.1)                    |                           | 1 (4.8)            |
| Northern America       | 18 (9.0)             | 2 (3.6)                             |                                   | 8 (12.1)                  |                            | 6 (50.0)                  | 2 (9.5)            |
| Southern Asia          | 16 (8.0)             | 5 (8.9)                             | 2 (5.9)                           | 3 (4.6)                   | 3 (27.3)                   | 1 (8.3)                   | 2 (9.5)            |
| Northern Africa        | 14 (7.0)             | 5 (8.9)                             | 4 (11.8)                          | 1 (1.5)                   |                            |                           | 4 (19.1)           |
| Southern Africa        | 13 (6.5)             | 1 (1.8)                             | 5 (14.7)                          | 5 (7.6)                   | 1 (9.1)                    |                           | 1 (4.8)            |
| Western Europe         | 13 (6.5)             | 4 (7.1)                             | 4 (11.8)                          | 4 (6.1)                   |                            |                           | 1 (4.8)            |
| Eastern Asia           | 11 (5.5)             | 1 (1.8)                             |                                   | 4 (6.1)                   | 1 (9.1)                    | 2 (16.7)                  | 3 (14.3)           |
| Southeastern Asia      | 10 (5.0)             | 2 (3.6)                             | 1 (2.9)                           | 5 (7.6)                   | 2 (18.2)                   |                           |                    |
| Eastern Africa         | 8 (4.0)              | 3 (5.4)                             | 1 (2.9)                           | 3 (4.6)                   |                            |                           | 1 (4.8)            |
| Northern Europe        | 6 (3.0)              | 2 (3.6)                             | 2 (5.9)                           | 1 (1.5)                   |                            |                           | 1 (4.8)            |

| Characteristics                    | Overall<br>n=200 (%) | Untreated<br>wastewater<br>n=56 (%) | Treated<br>wastewater<br>n=34 (%) | Surface water<br>n=66 (%) | Drinking water<br>n=11 (%) | Groundwater<br>r n=12 (%) | Others<br>n=21 (%) |
|------------------------------------|----------------------|-------------------------------------|-----------------------------------|---------------------------|----------------------------|---------------------------|--------------------|
| Central America                    | 5 (2.5)              | 2 (3.6)                             | 1 (2.9)                           | 2 (3.0)                   |                            |                           |                    |
| Western Asia                       | 5 (2.5)              | 3 (5.4)                             |                                   |                           |                            |                           | 2 (9.5)            |
| Central Africa                     | 1 (0.5)              |                                     |                                   |                           |                            | 1 (8.3)                   |                    |
| Oceania                            | 1 (0.5)              | 1 (1.8)                             |                                   |                           |                            |                           |                    |
|                                    |                      |                                     |                                   |                           |                            |                           |                    |
| <b>Country income level</b>        |                      |                                     |                                   |                           |                            |                           |                    |
| High-income economies              | 107 (53.5)           | 33 (58.9)                           | 17 (50.0)                         | 33 (50.0)                 | 3 (27.3)                   | 10 (83.3)                 | 11 (52.4)          |
| Upper-middle-income economies      | 54 (27.0)            | 10 (17.9)                           | 10 (29.4)                         | 25 (37.9)                 | 5 (45.5)                   |                           | 4 (19.1)           |
| Lower-middle income economies      | 33 (16.5)            | 12 (21.4)                           | 6 (17.7)                          | 6 (9.1)                   | 3 (27.3)                   | 1 (8.3)                   | 5 (23.8)           |
| Low-income economies               | 6 (3.0)              | 1 (1.8)                             | 1 (2.9)                           | 2 (3.0)                   |                            | 1 (8.3)                   | 1 (4.8)            |
|                                    |                      |                                     |                                   |                           |                            |                           |                    |
| <b>HAV_detection_method</b>        |                      |                                     |                                   |                           |                            |                           |                    |
| Conventional RT-PCR                | 109 (54.5)           | 34 (60.7)                           | 16 (47.1)                         | 32 (48.5)                 | 6 (54.6)                   | 9 (75.0)                  | 12 (57.1)          |
| Real-time RT-PCR                   | 75 (37.5)            | 16 (28.6)                           | 16 (47.1)                         | 30 (45.5)                 | 3 (27.3)                   | 2 (16.7)                  | 8 (38.1)           |
| ICC Conventional RT-PCR            | 5 (2.5)              | 1 (1.8)                             |                                   | 2 (3.0)                   | 1 (9.1)                    |                           | 1 (4.8)            |
| Immunocapture RT-PCR               | 5 (2.5)              | 2 (3.6)                             | 1 (2.9)                           | 1 (1.5)                   |                            | 1 (8.3)                   |                    |
| Molecular hybridization            | 3 (1.5)              | 2 (3.6)                             | 1 (2.9)                           |                           |                            |                           |                    |
| Countercurrent immuno-osmophoresis | 1 (0.5)              |                                     |                                   |                           | 1 (9.1)                    |                           |                    |
| Culture + Electron microscopy      | 1 (0.5)              | 1 (1.8)                             |                                   |                           |                            |                           |                    |
| Direct ELISA                       | 1 (0.5)              |                                     |                                   | 1 (1.5)                   |                            |                           |                    |
|                                    |                      |                                     |                                   |                           |                            |                           |                    |
| <b>Process control</b>             |                      |                                     |                                   |                           |                            |                           |                    |
| Yes                                | 74 (37.0)            | 15 (26.8)                           | 11 (32.4)                         | 33 (50.0)                 | 2 (18.2)                   | 5 (41.7)                  | 8 (38.1)           |
| Unclear/ Not reported              | 126 (63.0)           | 41 (73.2)                           | 23 (67.7)                         | 33 (50.0)                 | 9 (81.8)                   | 7 (58.3)                  | 13 (61.9)          |
|                                    |                      |                                     |                                   |                           |                            |                           |                    |
| <b>Risk of bias</b>                |                      |                                     |                                   |                           |                            |                           |                    |



| Characteristics       | Overall<br>n=200 (%) | Untreated<br>wastewater<br>n=56 (%) | Treated<br>wastewater<br>n=34 (%) | Surface water<br>n=66 (%) | Drinking water<br>n=11 (%) | Groundwater<br>r n=12 (%) | Others<br>n=21 (%) |
|-----------------------|----------------------|-------------------------------------|-----------------------------------|---------------------------|----------------------------|---------------------------|--------------------|
| Moderate risk of bias | 187 (93.5)           | 51 (91.1)                           | 31 (91.2)                         | 63 (95.5)                 | 11 (100)                   | 10 (83.3)                 | 21 (100)           |
| Low risk of bias      | 13 (6.5)             | 5 (8.9)                             | 3 (8.8)                           | 3 (4.6)                   |                            | 2 (16.7)                  |                    |

**Table S7:** Detailed results of meta-analysis results for prevalence of hepatitis A virus in various water matrices.

|                                         | Prevalence (%)<br>[95%CI] | 95%<br>Prediction<br>interval | Number<br>of<br>studies | Number of<br>samples | H<br>[95%CI]  | I <sup>2</sup><br>[95%CI] | P hetero-<br>geneity | P<br>difference<br>subtypes |
|-----------------------------------------|---------------------------|-------------------------------|-------------------------|----------------------|---------------|---------------------------|----------------------|-----------------------------|
| <b>HAV prevalence in water matrices</b> |                           |                               |                         |                      |               |                           |                      |                             |
| <b>Countries</b>                        |                           |                               |                         |                      |               |                           |                      | < 0.001                     |
| Kenya                                   | 52 [0-100]                | [0-100]                       | 3                       | 101                  | 7.3 [5.4-9.8] | 98.1 [96.5-99]            | < 0.001              |                             |
| Tunisia                                 | 39.1 [21.8-57.8]          | [0-96.6]                      | 9                       | 897                  | 5.5 [4.6-6.6] | 96.7 [95.2-97.7]          | < 0.001              |                             |
| Uganda                                  | 36.8 [20.7-54.3]          | [0-89.7]                      | 5                       | 97                   | 1.7 [1-2.7]   | 63.9 [4.8-86.3]           | 0.026                |                             |
| Singapore                               | 35.4 [2.4-79.1]           | [0-100]                       | 3                       | 81                   | 3.8 [2.5-6]   | 93.2 [83.4-97.2]          | < 0.001              |                             |
| Sweden                                  | 33.3 [0-83.3]             | [0-100]                       | 3                       | 49                   | 3.4 [2.2-5.5] | 91.6 [78.4-96.7]          | < 0.001              |                             |
| Brazil                                  | 32.5 [16.5-50.9]          | [0-100]                       | 22                      | 1121                 | 6.1 [5.5-6.8] | 97.3 [96.7-97.8]          | < 0.001              |                             |
| Egypt                                   | 31.8 [8.4-61.3]           | [0-100]                       | 4                       | 143                  | 3.6 [2.4-5.2] | 92.2 [83.2-96.4]          | < 0.001              |                             |
| South Africa                            | 28.5 [13-47]              | [0-95.6]                      | 13                      | 1235                 | 6.2 [5.4-7.1] | 97.4 [96.5-98]            | < 0.001              |                             |
| Spain                                   | 25.5 [12.7-40.6]          | [0-86.2]                      | 14                      | 1146                 | 4.7 [4-5.5]   | 95.5 [93.8-96.7]          | < 0.001              |                             |
| France                                  | 19.5 [4.1-41.3]           | [0-97.3]                      | 11                      | 520                  | 5 [4.2-6]     | 96 [94.3-97.2]            | < 0.001              |                             |
| India                                   | 14.3 [1.7-34.4]           | [0-91.4]                      | 9                       | 911                  | 6.5 [5.5-7.6] | 97.6 [96.7-98.3]          | < 0.001              |                             |
| Argentina                               | 12.9 [6.6-20.6]           | [0-92.8]                      | 3                       | 169                  | 1.2 [1-3.7]   | 29.2 [0-92.6]             | 0.244                |                             |
| Italy                                   | 11.5 [5.9-18.4]           | [0-56.1]                      | 29                      | 1857                 | 3.6 [3.2-4.1] | 92.4 [90.2-94.1]          | < 0.001              |                             |
| United States of America                | 8 [3-14.6]                | [0-43]                        | 17                      | 2202                 | 3.9 [3.3-4.6] | 93.4 [90.8-95.2]          | < 0.001              |                             |
| Costa Rica                              | 7.3 [3.7-11.8]            | [0-47.8]                      | 3                       | 176                  | 1 [1-3.1]     | 0 [0-89.6]                | 0.741                |                             |
| Pakistan                                | 4.8 [0.7-11.3]            | [0-29.8]                      | 6                       | 235                  | 1.6 [1-2.5]   | 62.1 [7.6-84.4]           | 0.022                |                             |

|                       | Prevalence (%)<br>[95%CI] | 95%<br>Prediction<br>interval | Number<br>of<br>studies | Number of<br>samples | H<br>[95%CI]  | I <sup>2</sup><br>[95%CI] | P hetero-<br>geneity | P<br>difference<br>subtypes |
|-----------------------|---------------------------|-------------------------------|-------------------------|----------------------|---------------|---------------------------|----------------------|-----------------------------|
| Thailand              | 3.1 [0-9.4]               | [0-33.2]                      | 6                       | 380                  | 2.3 [1.6-3.4] | 81.7 [61-91.4]            | < 0.001              |                             |
| Greece                | 1 [0-4.7]                 | [0-17.5]                      | 6                       | 428                  | 1.7 [1.1-2.7] | 66.8 [21-86.1]            | 0.01                 |                             |
| South Korea           | 0.4 [0-1.9]               | [0-6.3]                       | 10                      | 940                  | 1.5 [1.1-2.2] | 57.3 [13.6-78.9]          | 0.012                |                             |
| United Kingdom        | 0 [0-1.4]                 | [0-31.5]                      | 3                       | 143                  | 1 [1-3.1]     | 0 [0-89.6]                | 0.994                |                             |
|                       |                           |                               |                         |                      |               |                           |                      |                             |
| <b>WHO Region</b>     |                           |                               |                         |                      |               |                           |                      | 0.001                       |
| Africa                | 31.8 [16.9-48.8]          | [0-99.5]                      | 22                      | 1445                 | 6 [5.4-6.7]   | 97.3 [96.6-97.8]          | < 0.001              |                             |
| Eastern Mediterranean | 23.7 [13.4-35.6]          | [0-85.5]                      | 24                      | 1456                 | 4.8 [4.3-5.5] | 95.7 [94.6-96.6]          | < 0.001              |                             |
| America               | 20 [13-27.9]              | [0-80.7]                      | 49                      | 5060                 | 6.2 [5.7-6.6] | 97.4 [97-97.7]            | < 0.001              |                             |
| Europe                | 12.9 [8.8-17.7]           | [0-61.4]                      | 74                      | 5113                 | 4.3 [4-4.6]   | 94.6 [93.7-95.3]          | < 0.001              |                             |
| South-East Asia       | 8.8 [1.8-19.4]            | [0-65.7]                      | 15                      | 1291                 | 5.1 [4.4-5.9] | 96.1 [94.8-97.1]          | < 0.001              |                             |
| Western Pacific       | 4.7 [0.8-10.5]            | [0-36.4]                      | 15                      | 1045                 | 3 [2.5-3.7]   | 89.2 [83.9-92.8]          | < 0.001              |                             |
|                       |                           |                               |                         |                      |               |                           |                      |                             |
| <b>UNSD Region</b>    |                           |                               |                         |                      |               |                           |                      | < 0.001                     |
| Eastern Africa        | 43.2 [12.5-77]            | [0-100]                       | 8                       | 198                  | 4.7 [3.8-5.8] | 95.5 [93-97.1]            | < 0.001              |                             |
| Northern Africa       | 34.4 [20.7-49.4]          | [0-91.2]                      | 14                      | 1090                 | 4.9 [4.2-5.7] | 95.9 [94.4-97]            | < 0.001              |                             |
| South America         | 30 [17.4-44.2]            | [0-96.5]                      | 26                      | 1578                 | 5.7 [5.1-6.3] | 96.9 [96.2-97.5]          | < 0.001              |                             |
| Southern Africa       | 28.5 [13-47]              | [0-95.6]                      | 13                      | 1235                 | 6.2 [5.4-7.1] | 97.4 [96.5-98]            | < 0.001              |                             |
| Central America       | 18.8 [1.7-46.4]           | [0-100]                       | 5                       | 248                  | 4.7 [3.5-6.3] | 95.5 [92-97.4]            | < 0.001              |                             |
| Western Europe        | 18.1 [5.5-35.1]           | [0-88.5]                      | 13                      | 653                  | 4.6 [3.9-5.4] | 95.3 [93.4-96.6]          | < 0.001              |                             |
| Western Asia          | 18 [5.1-35.9]             | [0-88.1]                      | 5                       | 523                  | 4.2 [3.1-5.7] | 94.3 [89.4-96.9]          | < 0.001              |                             |
| Southern Asia         | 13.1 [3.6-26.4]           | [0-79.3]                      | 16                      | 1164                 | 5.2 [4.6-6]   | 96.4 [95.2-97.3]          | < 0.001              |                             |
| Southeastern Asia     | 13 [3.6-26.4]             | [0-69.7]                      | 10                      | 473                  | 3.4 [2.7-4.3] | 91.5 [86.6-94.7]          | < 0.001              |                             |
| Southern Europe       | 11.4 [7.3-16.3]           | [0-53.8]                      | 53                      | 3858                 | 3.9 [3.6-4.3] | 93.4 [92.1-94.5]          | < 0.001              |                             |
| Northern Europe       | 9.4 [0-35.1]              | [0-99.7]                      | 6                       | 192                  | 4.1 [3.1-5.5] | 94.2 [89.9-96.6]          | < 0.001              |                             |
| Northern America      | 6.7 [2.9-11.7]            | [0-32.9]                      | 18                      | 3234                 | 3.8 [3.2-4.4] | 93 [90.4-94.9]            | < 0.001              |                             |
| Eastern Asia          | 0.3 [0-1.6]               | [0-5.6]                       | 11                      | 952                  | 1.5 [1-2]     | 52.6 [5.9-76.1]           | 0.021                |                             |
|                       |                           |                               |                         |                      |               |                           |                      |                             |

|                                          | Prevalence (%)<br>[95%CI] | 95%<br>Prediction<br>interval | Number<br>of<br>studies | Number of<br>samples | H<br>[95%CI]  | I <sup>2</sup><br>[95%CI] | P hetero-<br>geneity | P<br>difference<br>subtypes |
|------------------------------------------|---------------------------|-------------------------------|-------------------------|----------------------|---------------|---------------------------|----------------------|-----------------------------|
|                                          |                           |                               |                         |                      |               |                           |                      |                             |
| <b>Country income level</b>              |                           |                               |                         |                      |               |                           |                      | 0.002                       |
| Low-income economies                     | 29 [11.8-49.6]            | [0-92.4]                      | 6                       | 109                  | 2.1 [1.4-3.1] | 77.6 [50.2-89.9]          | < 0.001              |                             |
| Lower-middle income economies            | 24.2 [13-37.3]            | [0-96.1]                      | 33                      | 2349                 | 6.7 [6.1-7.2] | 97.7 [97.3-98.1]          | < 0.001              |                             |
| Upper-middle-income economies            | 22.9 [15.4-31.3]          | [0-86.9]                      | 54                      | 3636                 | 5.5 [5.2-6]   | 96.7 [96.2-97.2]          | < 0.001              |                             |
| High-income economies                    | 10.8 [7.8-14.1]           | [0-52.2]                      | 107                     | 9328                 | 4.3 [4-4.5]   | 94.6 [93.9-95.2]          | < 0.001              |                             |
|                                          |                           |                               |                         |                      |               |                           |                      |                             |
| <b>Study period range</b>                |                           |                               |                         |                      |               |                           |                      | 0.853                       |
| [1986-2000]                              | 14.5 [7.5-23.1]           | [0-65.7]                      | 25                      | 1774                 | 4.3 [3.7-4.8] | 94.5 [92.9-95.7]          | < 0.001              |                             |
| [2000-2010]                              | 17.3 [11.1-24.4]          | [0-82.3]                      | 67                      | 3556                 | 5 [4.7-5.4]   | 96 [95.4-96.5]            | < 0.001              |                             |
| [2010-2020]                              | 15.5 [10.1-21.7]          | [0-77.5]                      | 75                      | 5792                 | 5.7 [5.3-6]   | 96.9 [96.5-97.2]          | < 0.001              |                             |
|                                          |                           |                               |                         |                      |               |                           |                      |                             |
| <b>Environmental matrices categories</b> |                           |                               |                         |                      |               |                           |                      | < 0.001                     |
| Untreated wastewater                     | 31.5 [23.1-40.5]          | [0-92.8]                      | 56                      | 2840                 | 4.8 [4.4-5.2] | 95.6 [94.9-96.2]          | < 0.001              |                             |
| Treated wastewater                       | 18 [9.5-28.3]             | [0-83.9]                      | 34                      | 1649                 | 4.7 [4.3-5.2] | 95.5 [94.5-96.3]          | < 0.001              |                             |
| Surface water                            | 14.6 [9.9-20]             | [0-66.8]                      | 66                      | 5851                 | 5.1 [4.8-5.5] | 96.2 [95.6-96.7]          | < 0.001              |                             |
| Others                                   | 8.5 [3.2-15.7]            | [0-50.8]                      | 21                      | 1529                 | 3.7 [3.2-4.3] | 92.6 [90-94.5]            | < 0.001              |                             |
| Groundwater                              | 2.4 [0.2-6.1]             | [0-20.9]                      | 12                      | 2165                 | 3.2 [2.5-3.9] | 90 [84.6-93.6]            | < 0.001              |                             |
| Drinking water                           | 0.4 [0-1.8]               | [0-6.2]                       | 11                      | 1388                 | 1.7 [1.2-2.3] | 64.4 [32-81.3]            | 0.002                |                             |
|                                          |                           |                               |                         |                      |               |                           |                      |                             |
| <b>HAV_detection_method</b>              |                           |                               |                         |                      |               |                           |                      | < 0.001                     |
| Molecular hybridization                  | 55 [23.9-84.2]            | [0-100]                       | 3                       | 70                   | 2.4 [1.3-4.1] | 82.1 [44.7-94.2]          | 0.004                |                             |
| Immunocapture RT-PCR                     | 48.4 [20.6-76.8]          | [0-100]                       | 5                       | 61                   | 2.2 [1.4-3.4] | 79.3 [50.9-91.3]          | 0.001                |                             |
| Real-time RT-PCR                         | 20.4 [13.5-28.3]          | [0-90.8]                      | 75                      | 6781                 | 7.2 [6.8-7.6] | 98.1 [97.9-98.3]          | < 0.001              |                             |
| Conventional RT-PCR                      | 13.3 [10.2-16.8]          | [0-55.5]                      | 109                     | 7535                 | 3.8 [3.6-4.1] | 93.2 [92.3-94]            | < 0.001              |                             |
| ICC Conventional RT-PCR                  | 1.1 [0-11.1]              | [0-64.9]                      | 5                       | 669                  | 4.8 [3.6-6.3] | 95.6 [92.3-97.5]          | < 0.001              |                             |

**Table S5:** Individual characteristics of included studies (provided as excel file)

**Table S6:** Risk of bias assessment (provided as excel file)

**Figure S1:** Global prevalence estimate of hepatitis A virus in various water matrices (provided as pdf file)

**Figure S2:** Funnel chart for publications of the global hepatitis A virus prevalence in water matrices (provided as pdf file)
