# Supplementary material for: Occurrence of Hepatitis A Virus in Water Matrices: A Systematic Review and Meta-Analysis
Source: Int J Environ Res Public Health. 2023 Jan 6;20(2):1054. doi: 10.3390/ijerph20021054 (PMC9859052; doi:10.3390/ijerph20021054)
Supplement: Supplementary file 1 [file ijerph-20-01054-s001.zip]

Archive with 5 entries (5 files):
- Figure S1.pdf
- Figure S2.pdf
- Supplemental Material - HAV.pdf
- Table S5.xlsx
- Table S6.xlsx
