# Supplementary material for: Occurrence of Hepatitis A Virus in Water Matrices: A Systematic Review and Meta-Analysis
Source: Int J Environ Res Public Health. 2023 Jan 6;20(2):1054. doi: 10.3390/ijerph20021054 (PMC9859052; doi:10.3390/ijerph20021054)
Supplement: Supplementary file 1 [file ijerph-20-01054-s001.zip › Table S5.xlsx]

## Sheet: Included
Unique_ID	Title	Author	Year (Year of publication)	Sampling	Number of sites	Timing of samples collection	Countries	WHO Region	UNSD Region	Country income level	Study period	Study period range	Environmental matrices categories	Environmental matrices	Starting volume for concentration (mL)	HAV_detection_method	Process control	Genotype detected	Cell lines	Detection method	Number tested (culture)	Number positive (culture)
1	A strategy for detection of viruses in groundwater by PCR.	Abbaszadegan	1999	Non probabilistic	Multicenter	Prospectively	United States of America	America	Northern America	High-income economies	Unclear/ Not reported	Unclear/ Not reported	Groundwater	Groundwater	Unclear/ Not reported	Conventional RT-PCR	Unclear/ Not reported	Unclear/ Not reported	Unclear/ Not reported	Unclear/ Not reported	Unclear/ Not reported	Unclear/ Not reported
2	Quantitative PCR Detection and Characterisation of Human Adenovirus, Rotavirus and Hepatitis A Virus in Discharged Effluents of Two Wastewater Treatment Facilities in the Eastern Cape, South Africa.	Adefisoye	2016	Non probabilistic	Multicenter	Prospectively	South Africa	Africa	Southern Africa	Upper-middle-income economies	Sep/2012-Aug/2013	[2010-2020]	Treated wastewater	Effluent samples	1000	Real-time RT-PCR	Yes	Unclear/ Not reported	Unclear/ Not reported	Unclear/ Not reported	Unclear/ Not reported	Unclear/ Not reported
3	Frequency of hepatitis E and Hepatitis A virus in water sample collected from Faisalabad, Pakistan.	Ahmad	2015	Non probabilistic	Multicenter	Prospectively	Pakistan	Eastern Mediterranean	Southern Asia	Lower-middle income economies	2013	[2010-2020]	Drinking water	Tap water	1000	Conventional RT-PCR	Unclear/ Not reported	Unclear/ Not reported	Unclear/ Not reported	Unclear/ Not reported	Unclear/ Not reported	Unclear/ Not reported
4	Frequency of hepatitis E and Hepatitis A virus in water sample collected from Faisalabad, Pakistan.	Ahmad	2015	Non probabilistic	Multicenter	Prospectively	Pakistan	Eastern Mediterranean	Southern Asia	Lower-middle income economies	2013	[2010-2020]	Surface water	Surface water samples	1000	Conventional RT-PCR	Unclear/ Not reported	Unclear/ Not reported	Unclear/ Not reported	Unclear/ Not reported	Unclear/ Not reported	Unclear/ Not reported
5	Frequency of hepatitis E and Hepatitis A virus in water sample collected from Faisalabad, Pakistan.	Ahmad	2015	Non probabilistic	Multicenter	Prospectively	Pakistan	Eastern Mediterranean	Southern Asia	Lower-middle income economies	2013	[2010-2020]	Untreated wastewater	Sewage sample	1000	Conventional RT-PCR	Unclear/ Not reported	Unclear/ Not reported	Unclear/ Not reported	Unclear/ Not reported	Unclear/ Not reported	Unclear/ Not reported
6	Prevalence of rotavirus, adenovirus, hepatitis A virus and enterovirus in water samples collected from different region of Peshawar, Pakistan.	Ahmad	2016	Non probabilistic	Monocenter	Prospectively	Pakistan	Eastern Mediterranean	Southern Asia	Lower-middle income economies	Jun/2014-May/2015	[2010-2020]	Others	Drinking water, Sewage sample	Unclear/ Not reported	Conventional RT-PCR	Unclear/ Not reported	Unclear/ Not reported	Unclear/ Not reported	Unclear/ Not reported	Unclear/ Not reported	Unclear/ Not reported
7	Assessment of the risk for human health of enterovirus and hepatitis a virus in clinical and water sources from three metropolitan cities of Pakistan.	Ahmad	2018	Non probabilistic	Multicenter	Prospectively	Pakistan	Eastern Mediterranean	Southern Asia	Lower-middle income economies	Jun/2016-Jun/2017	[2010-2020]	Drinking water	Drinking water	Unclear/ Not reported	Conventional RT-PCR	Unclear/ Not reported	1 IA	Unclear/ Not reported	Unclear/ Not reported	Unclear/ Not reported	Unclear/ Not reported
8	Assessment of the risk for human health of enterovirus and hepatitis a virus in clinical and water sources from three metropolitan cities of Pakistan.	Ahmad	2018	Non probabilistic	Multicenter	Prospectively	Pakistan	Eastern Mediterranean	Southern Asia	Lower-middle income economies	Jun/2016-Jun/2017	[2010-2020]	Surface water	River water	Unclear/ Not reported	Conventional RT-PCR	Unclear/ Not reported	2 IA	Unclear/ Not reported	Unclear/ Not reported	Unclear/ Not reported	Unclear/ Not reported
9	Comparison of two virus concentration methods for enteric viruses detection in Moroccan wastewater and treated effluent.	Amdiouni	2017	Non probabilistic	Monocenter	Prospectively	Morocco	Eastern Mediterranean	Northern Africa	Lower-middle income economies	Jan/2009-Dec/2009	[2000-2010]	Others	Raw wastewater; Treated effluents	500	Conventional RT-PCR	Unclear/ Not reported	Unclear/ Not reported	Unclear/ Not reported	Unclear/ Not reported	Unclear/ Not reported	Unclear/ Not reported
10	Virus removal in conventional wastewater treatment process.	Anastasi	2008	Non probabilistic	Monocenter	Prospectively	Italy	Europe	Southern Europe	High-income economies	Unclear/ Not reported	Unclear/ Not reported	Treated wastewater	Wastewater sample	Unclear/ Not reported	Conventional RT-PCR	Unclear/ Not reported	Unclear/ Not reported	Unclear/ Not reported	Unclear/ Not reported	Unclear/ Not reported	Unclear/ Not reported
11	Molecular characteristics of hepatitis A virus from a large outbreak from Kerala, India.	Arankalle	2006	Non probabilistic	Multicenter	Prospectively	India	South-East Asia	Southern Asia	Lower-middle income economies	2005	[2000-2010]	Untreated wastewater	Sewage samples	20000	Conventional RT-PCR	Unclear/ Not reported	Unclear/ Not reported	Unclear/ Not reported	Unclear/ Not reported	Unclear/ Not reported	Unclear/ Not reported
12	Environmental surveillance and molecular characterization of human enteric viruses in tropical urban wastewaters.	Aw	2010	Non probabilistic	Monocenter	Prospectively	Singapore	Western Pacific	Southeastern Asia	High-income economies	2007	[2000-2010]	Treated wastewater	Effluent samples	1000	Conventional RT-PCR	Unclear/ Not reported	Unclear/ Not reported	Unclear/ Not reported	Unclear/ Not reported	Unclear/ Not reported	Unclear/ Not reported
13	Environmental surveillance and molecular characterization of human enteric viruses in tropical urban wastewaters.	Aw	2010	Non probabilistic	Monocenter	Prospectively	Singapore	Western Pacific	Southeastern Asia	High-income economies	2007	[2000-2010]	Untreated wastewater	Sewage sample	1000	Conventional RT-PCR	Unclear/ Not reported	6 IA	Unclear/ Not reported	Unclear/ Not reported	Unclear/ Not reported	Unclear/ Not reported
14	Prevalence and genetic diversity of waterborne pathogenic viruses in surface waters of tropical urban catchments.	Aw	2011	Non probabilistic	Multicenter	Prospectively	Singapore	Western Pacific	Southeastern Asia	High-income economies	Jun/2006-Jan/2009	[2000-2010]	Surface water	Surface water	Unclear/ Not reported	Conventional RT-PCR	Yes	Unclear/ Not reported	Unclear/ Not reported	Unclear/ Not reported	Unclear/ Not reported	Unclear/ Not reported
15	Development of diagnostic systems for wide range and highly sensitive detection of two waterborne hepatitis viruses from groundwater using the conventional reverse transcription nested PCR assay.	Bae	2022	Non probabilistic	Monocenter	Prospectively	South Korea	Western Pacific	Eastern Asia	High-income economies	Unclear/ Not reported	Unclear/ Not reported	Groundwater	Groundwater	Unclear/ Not reported	Conventional RT-PCR	Yes	Unclear/ Not reported	Unclear/ Not reported	Unclear/ Not reported	Unclear/ Not reported	Unclear/ Not reported
16	Occurrence of four waterborne viruses at five typical raw water resources in the Republic of Korea during August 2013 to February 2019.	Bahk	2020	Non probabilistic	Multicenter	Prospectively	South Korea	Western Pacific	Eastern Asia	High-income economies	Aug/2013-Feb/2019	[2010-2020]	Surface water	River samples	10000	Conventional RT-PCR	Unclear/ Not reported	1 IA; 3 IB	Unclear/ Not reported	Unclear/ Not reported	Unclear/ Not reported	Unclear/ Not reported
17	Detection of subgenotype IA and IIIA hepatitis A viruses in rivers flowing through metro Manila, the Philippines.	Bai	2019	Non probabilistic	Multicenter	Prospectively	Philippines	Western Pacific	Southeastern Asia	Lower-middle income economies	Dec/2012-July/2013	[2010-2020]	Surface water	River samples	Unclear/ Not reported	Conventional RT-PCR	Unclear/ Not reported	7 IA; 1 IIIA	Unclear/ Not reported	Unclear/ Not reported	Unclear/ Not reported	Unclear/ Not reported
18	Longitudinal study on occurrence of adenoviruses and hepatitis A virus in raw domestic sewage in the city of Limeira, SÃo Paulo.	Barrella	2009	Non probabilistic	Monocenter	Prospectively	Brazil	America	South America	Upper-middle-income economies	Dec/2004-Dec/2005	[2000-2010]	Untreated wastewater	Raw sewage sample	Unclear/ Not reported	Conventional RT-PCR	Yes	Unclear/ Not reported	Unclear/ Not reported	Unclear/ Not reported	Unclear/ Not reported	Unclear/ Not reported
19	Qualitative and Quantitative Assessment of Hepatitis A Virus in Wastewaters in Tunisia.	Béji-Hamza	2014	Non probabilistic	Multicenter	Prospectively	Tunisia	Eastern Mediterranean	Northern Africa	Lower-middle income economies	2007-2008	[2000-2010]	Treated wastewater	Treated sewage	Unclear/ Not reported	Conventional RT-PCR	Yes	45 IA; 1 IB	Unclear/ Not reported	Unclear/ Not reported	Unclear/ Not reported	Unclear/ Not reported
20	Qualitative and Quantitative Assessment of Hepatitis A Virus in Wastewaters in Tunisia.	Béji-Hamza	2014	Non probabilistic	Multicenter	Prospectively	Tunisia	Eastern Mediterranean	Northern Africa	Lower-middle income economies	2007-2008	[2000-2010]	Untreated wastewater	Raw sewage	Unclear/ Not reported	Conventional RT-PCR	Yes	53 IA; 1 IB	Unclear/ Not reported	Unclear/ Not reported	Unclear/ Not reported	Unclear/ Not reported
21	Monitoring human enteric viruses in wastewater and relevance to infections encountered in the clinical setting: A one-year experiment in central France, 2014 to 2015.	Bisseux	2018	Non probabilistic	Monocenter	Prospectively	France	Europe	Western Europe	High-income economies	Oct/2014-Oct/2015	[2010-2020]	Treated wastewater	Treated sewage	16.5	Real-time RT-PCR	Unclear/ Not reported	Unclear/ Not reported	Unclear/ Not reported	Unclear/ Not reported	Unclear/ Not reported	Unclear/ Not reported
22	Monitoring human enteric viruses in wastewater and relevance to infections encountered in the clinical setting: A one-year experiment in central France, 2014 to 2015.	Bisseux	2018	Non probabilistic	Monocenter	Prospectively	France	Europe	Western Europe	High-income economies	Oct/2014-Oct/2015	[2010-2020]	Untreated wastewater	Raw sewage	Unclear/ Not reported	Real-time RT-PCR	Unclear/ Not reported	3 IA; 3 IIIA	Unclear/ Not reported	Unclear/ Not reported	Unclear/ Not reported	Unclear/ Not reported
23	Glass Wool Concentration Optimization for the Detection of Enveloped and Non-enveloped Waterborne Viruses.	Blanco	2019	Non probabilistic	Multicenter	Prospectively	Saudi Arabia	Eastern Mediterranean	Western Asia	High-income economies	Sep/2015-Nov/2015	[2010-2020]	Untreated wastewater	Water samples	5000	Real-time RT-PCR	Unclear/ Not reported	Unclear/ Not reported	Unclear/ Not reported	Unclear/ Not reported	Unclear/ Not reported	Unclear/ Not reported
24	Incidence of enteric viruses in groundwater from household wells in Wisconsin.	Borchardt	2003	Probabilistic	Multicenter	Prospectively	United States of America	America	Northern America	High-income economies	Jan/1999-Jun/2000	[1986-2000]	Groundwater	Well water	1500	Conventional RT-PCR	Yes	Unclear/ Not reported	Unclear/ Not reported	Unclear/ Not reported	Unclear/ Not reported	Unclear/ Not reported
25	Vulnerability of drinking-water wells in La Crosse, Wisconsin, to enteric-virus contamination from surface water contributions.	Borchardt	2004	Non probabilistic	Multicenter	Prospectively	United States of America	America	Northern America	High-income economies	Mar/2001-Feb/2002	[2000-2010]	Groundwater	Well water	1500	Conventional RT-PCR	Yes	Unclear/ Not reported	Fetal rhesus monkey kidney (FRHK-4)	Immunoﬂuorescence/RT-PCR/Southern hybridization	4	3
26	Vulnerability of drinking-water wells in La Crosse, Wisconsin, to enteric-virus contamination from surface water contributions.	Borchardt	2004	Non probabilistic	Multicenter	Prospectively	United States of America	America	Northern America	High-income economies	Mar/2001-Feb/2002	[2000-2010]	Surface water	River water	1500	Conventional RT-PCR	Yes	Unclear/ Not reported	Unclear/ Not reported	Unclear/ Not reported	Unclear/ Not reported	Unclear/ Not reported
27	Epidemiological surveillance of human enteric viruses by monitoring of different environmental matrices.	Carducci	2006	Non probabilistic	Monocenter	Prospectively	Italy	Europe	Southern Europe	High-income economies	May/2004-Mar/2005	[2000-2010]	Surface water	River water, Seawater	Unclear/ Not reported	Conventional RT-PCR	Unclear/ Not reported	Unclear/ Not reported	Unclear/ Not reported	Unclear/ Not reported	Unclear/ Not reported	Unclear/ Not reported
28	Epidemiological surveillance of human enteric viruses by monitoring of different environmental matrices.	Carducci	2006	Non probabilistic	Monocenter	Prospectively	Italy	Europe	Southern Europe	High-income economies	May/2004-Mar/2005	[2000-2010]	Treated wastewater	Sewage effluent	Unclear/ Not reported	Conventional RT-PCR	Unclear/ Not reported	Unclear/ Not reported	Unclear/ Not reported	Unclear/ Not reported	Unclear/ Not reported	Unclear/ Not reported
29	Epidemiological surveillance of human enteric viruses by monitoring of different environmental matrices.	Carducci	2006	Non probabilistic	Monocenter	Prospectively	Italy	Europe	Southern Europe	High-income economies	May/2004-Mar/2005	[2000-2010]	Untreated wastewater	Raw sewage	Unclear/ Not reported	Conventional RT-PCR	Unclear/ Not reported	Unclear/ Not reported	Unclear/ Not reported	Unclear/ Not reported	Unclear/ Not reported	Unclear/ Not reported
30	Study of the viral removal efficiency in a urban wastewater treatment plant.	Carducci	2008	Non probabilistic	Monocenter	Prospectively	Italy	Europe	Southern Europe	High-income economies	Apr/2007-Jun/2007	[2000-2010]	Others	Sewage samples (entry and exit samples)	Unclear/ Not reported	Conventional RT-PCR	Unclear/ Not reported	Unclear/ Not reported	Unclear/ Not reported	Unclear/ Not reported	Unclear/ Not reported	Unclear/ Not reported
31	Viral removal by wastewater treatment: Monitoring of indicators and pathogens.	Carducci	2009	Non probabilistic	Monocenter	Prospectively	Italy	Europe	Southern Europe	High-income economies	Mar/2007-Apr/2008	[2000-2010]	Treated wastewater	Effluent sewage	40	Conventional RT-PCR	Unclear/ Not reported	Unclear/ Not reported	Unclear/ Not reported	Unclear/ Not reported	Unclear/ Not reported	Unclear/ Not reported
32	Viral removal by wastewater treatment: Monitoring of indicators and pathogens.	Carducci	2009	Non probabilistic	Monocenter	Prospectively	Italy	Europe	Southern Europe	High-income economies	Mar/2007-Apr/2008	[2000-2010]	Untreated wastewater	Influent sewage	40	Conventional RT-PCR	Unclear/ Not reported	Unclear/ Not reported	Unclear/ Not reported	Unclear/ Not reported	Unclear/ Not reported	Unclear/ Not reported
33	Virological control of groundwater quality using biomolecular tests.	Carducci	2003	Non probabilistic	Monocenter	Prospectively	Italy	Europe	Southern Europe	High-income economies	Unclear/ Not reported	Unclear/ Not reported	Groundwater	Groundwater	100000	Conventional RT-PCR	Yes	Unclear/ Not reported	Unclear/ Not reported	Unclear/ Not reported	Unclear/ Not reported	Unclear/ Not reported
34	Wastewater-based epidemiology of enteric viruses and surveillance of acute gastrointestinal illness outbreaks in a resource-limited region.	Chacón	2021	Non probabilistic	Multicenter	Prospectively	Costa Rica	America	Central America	Upper-middle-income economies	2013	[2010-2020]	Untreated wastewater	Influent (raw, untreated sewage)	1000	Conventional RT-PCR	Unclear/ Not reported	Unclear/ Not reported	Unclear/ Not reported	Unclear/ Not reported	Unclear/ Not reported	Unclear/ Not reported
35	A Somatic Coliphage Threshold Approach To Improve the Management of Activated Sludge Wastewater Treatment Plant Effluents in Resource-Limited Regions.	Chacón	2020	Non probabilistic	Multicenter	Prospectively	Costa Rica	America	Central America	Upper-middle-income economies	Mar/2013-Dec/2013	[2010-2020]	Treated wastewater	Effluent wastewater sample	1500	Conventional RT-PCR	Unclear/ Not reported	Unclear/ Not reported	Unclear/ Not reported	Unclear/ Not reported	Unclear/ Not reported	Unclear/ Not reported
36	A Somatic Coliphage Threshold Approach To Improve the Management of Activated Sludge Wastewater Treatment Plant Effluents in Resource-Limited Regions.	Chacón	2020	Non probabilistic	Multicenter	Prospectively	Costa Rica	America	Central America	Upper-middle-income economies	Mar/2013-Dec/2013	[2010-2020]	Untreated wastewater	Influent wastewater sample	1500	Conventional RT-PCR	Unclear/ Not reported	Unclear/ Not reported	Unclear/ Not reported	Unclear/ Not reported	Unclear/ Not reported	Unclear/ Not reported
37	Quantitative RT-PCR detection of hepatitis A virus, rotaviruses and enteroviruses in the Buffalo River and source water dams in the Eastern Cape Province of South Africa.	Chigor	2012	Non probabilistic	Multicenter	Prospectively	South Africa	Africa	Southern Africa	Upper-middle-income economies	Aug/2010-July/2011	[2010-2020]	Surface water	River water	1000	Real-time RT-PCR	Unclear/ Not reported	Unclear/ Not reported	Unclear/ Not reported	Unclear/ Not reported	Unclear/ Not reported	Unclear/ Not reported
38	Outbreaks of hepatitis A among children in western India.	Chitambar	2007	Non probabilistic	Monocenter	Prospectively	India	South-East Asia	Southern Asia	Lower-middle income economies	Apr/2002-May/2002	[2000-2010]	Untreated wastewater	Sewage sample	Unclear/ Not reported	Conventional RT-PCR	Unclear/ Not reported	1 IB; 4 IIIA	Unclear/ Not reported	Unclear/ Not reported	Unclear/ Not reported	Unclear/ Not reported
39	A potential risk assessment tool to monitor pathogens circulation in coastal waters.	Cioffi	2021	Non probabilistic	Multicenter	Prospectively	Italy	Europe	Southern Europe	High-income economies	Feb/2019-Aug/2020	[2010-2020]	Surface water	Seawater	Unclear/ Not reported	Real-time RT-PCR	Yes	Unclear/ Not reported	Unclear/ Not reported	Unclear/ Not reported	Unclear/ Not reported	Unclear/ Not reported
40	Hepatitis E virus epidemiology in industrialized countries.	Clemente-Casares	2003	Non probabilistic	Monocenter	Retroprospectively	Spain	Europe	Southern Europe	High-income economies	1994-2000	[1986-2000]	Untreated wastewater	Sewage sample	40	Conventional RT-PCR	Unclear/ Not reported	Unclear/ Not reported	Unclear/ Not reported	Unclear/ Not reported	Unclear/ Not reported	Unclear/ Not reported
41	Human and bovine viruses in the Milwaukee River watershed: hydrologically relevant representation and relations with environmental variables.	Corsi	2014	Non probabilistic	Multicenter	Prospectively	United States of America	America	Northern America	High-income economies	Feb/2007-Jun/2008	[2000-2010]	Surface water	River water	Unclear/ Not reported	Real-time RT-PCR	Yes	Unclear/ Not reported	Unclear/ Not reported	Unclear/ Not reported	Unclear/ Not reported	Unclear/ Not reported
42	Enteric viruses and fecal bacteria indicators to assess groundwater quality and suitability for irrigation.	De Giglio	2017	Non probabilistic	Multicenter	Prospectively	Italy	Europe	Southern Europe	High-income economies	2014	[2010-2020]	Groundwater	Well water	20000	Real-time RT-PCR	Unclear/ Not reported	Unclear/ Not reported	Unclear/ Not reported	Unclear/ Not reported	Unclear/ Not reported	Unclear/ Not reported
43	Hepatitis A virus in environmental water samples from the Amazon Basin.	De Paula	2007	Non probabilistic	Multicenter	Prospectively	Brazil	America	South America	Upper-middle-income economies	Aug/2004-Jul/2005	[2000-2010]	Surface water	River water	Unclear/ Not reported	Real-time RT-PCR	Unclear/ Not reported	24 IA; 24 IB	Unclear/ Not reported	Unclear/ Not reported	Unclear/ Not reported	Unclear/ Not reported
44	Molecular confirmation of hepatitis A virus from well water: Epidemiology and public health implications.	De Serres	1999	Non probabilistic	Monocenter	Prospectively	United States of America	America	Northern America	High-income economies	May/1995-Oct/1995	[1986-2000]	Groundwater	Well water	Unclear/ Not reported	Immunocapture RT-PCR	Unclear/ Not reported	6 IA	Unclear/ Not reported	Unclear/ Not reported	Unclear/ Not reported	Unclear/ Not reported
45	Low occurrence of hepatitis A virus in water samples from an urban area of southern Brazil.	de Souza	2018	Non probabilistic	Multicenter	Prospectively	Brazil	America	South America	Upper-middle-income economies	2012-2014	[2010-2020]	Surface water	Streams water	500	Real-time RT-PCR	Yes	Unclear/ Not reported	Unclear/ Not reported	Unclear/ Not reported	Unclear/ Not reported	Unclear/ Not reported
46	Detection of human enteric viruses in stream water with RT-PCR and cell culture.	Denis-Mize	2004	Non probabilistic	Multicenter	Prospectively	United States of America	America	Northern America	High-income economies	Dec/1997-May/1998	[1986-2000]	Surface water	Stream water	Unclear/ Not reported	Conventional RT-PCR	Yes	Unclear/ Not reported	Unclear/ Not reported	Unclear/ Not reported	Unclear/ Not reported	Unclear/ Not reported
47	Detection and quantification of human adenovirus (HAdV), JC polyomavirus (JCPyV) and hepatitis A virus (HAV) in recreational waters of Niterói, Rio de Janeiro, Brazil.	Dias	2018	Non probabilistic	Multicenter	Prospectively	Brazil	America	South America	Upper-middle-income economies	Jan/2017-Dec/2017	[2010-2020]	Surface water	Seawater	10000	Real-time RT-PCR	Yes	Unclear/ Not reported	Unclear/ Not reported	Unclear/ Not reported	Unclear/ Not reported	Unclear/ Not reported
48	Application of the PCR technique to the detection of hepatitis A virus in the environment.	Divizia	1993	Non probabilistic	Monocenter	Prospectively	Italy	Europe	Southern Europe	High-income economies	Unclear/ Not reported	Unclear/ Not reported	Surface water	River water	Unclear/ Not reported	Immunocapture RT-PCR	Unclear/ Not reported	Unclear/ Not reported	Unclear/ Not reported	Unclear/ Not reported	13	3
49	Hepatitis A virus detection in wastewater by PCR and hybridization.	Divizia	1998	Non probabilistic	Multicenter	Prospectively	Italy	Europe	Southern Europe	High-income economies	Unclear/ Not reported	Unclear/ Not reported	Treated wastewater	Treated sewage	Unclear/ Not reported	Immunocapture RT-PCR	Unclear/ Not reported	Unclear/ Not reported	Unclear/ Not reported	Unclear/ Not reported	Unclear/ Not reported	Unclear/ Not reported
50	Hepatitis A virus detection in wastewater by PCR and hybridization.	Divizia	1998	Non probabilistic	Multicenter	Prospectively	Italy	Europe	Southern Europe	High-income economies	Unclear/ Not reported	Unclear/ Not reported	Untreated wastewater	Raw sewage	Unclear/ Not reported	Immunocapture RT-PCR	Unclear/ Not reported	Unclear/ Not reported	Unclear/ Not reported	Unclear/ Not reported	Unclear/ Not reported	Unclear/ Not reported
51	Detection of hepatitis A virus and other enteroviruses in wastewater and surface water samples by gene probe assay.	Dubrou	1991	Non probabilistic	Monocenter	Prospectively	France	Europe	Western Europe	High-income economies	Unclear/ Not reported	Unclear/ Not reported	Untreated wastewater	Wastewater sample	Unclear/ Not reported	Molecular hybridization	Unclear/ Not reported	Unclear/ Not reported	Unclear/ Not reported	Unclear/ Not reported	Unclear/ Not reported	Unclear/ Not reported
52	Enteric viruses in surface water and sediment samples from the catchment area of Peri Lagoon, Santa Catarina State, Brazil.	Elmahdy	2016	Non probabilistic	Multicenter	Prospectively	Brazil	America	South America	Upper-middle-income economies	Mar/2013-Aug/2013	[2010-2020]	Surface water	Surface water	Unclear/ Not reported	Real-time RT-PCR	Yes	Unclear/ Not reported	Unclear/ Not reported	Unclear/ Not reported	Unclear/ Not reported	Unclear/ Not reported
53	Spatial distribution of enteric viruses and somatic coliphages in a Lagoon used as drinking water source and recreation in Southern Brazil.	Elmahdy	2016	Non probabilistic	Multicenter	Prospectively	Brazil	America	South America	Upper-middle-income economies	Jan/2014-Dec/2014	[2010-2020]	Surface water	Surface water	Unclear/ Not reported	Real-time RT-PCR	Yes	Unclear/ Not reported	Unclear/ Not reported	Unclear/ Not reported	Unclear/ Not reported	Unclear/ Not reported
54	Seasonal and spatial dynamics of enteric viruses in wastewater and in riverine and estuarine receiving waters.	Farkas	2018	Non probabilistic	Multicenter	Prospectively	United Kingdom	Europe	Northern Europe	High-income economies	Aug/2016-Aug/2017	[2010-2020]	Surface water	Surface water	Unclear/ Not reported	Real-time RT-PCR	Yes	Unclear/ Not reported	Unclear/ Not reported	Unclear/ Not reported	Unclear/ Not reported	Unclear/ Not reported
55	Seasonal and spatial dynamics of enteric viruses in wastewater and in riverine and estuarine receiving waters.	Farkas	2018	Non probabilistic	Multicenter	Prospectively	United Kingdom	Europe	Northern Europe	High-income economies	Aug/2016-Aug/2017	[2010-2020]	Treated wastewater	Wastewater effluent	Unclear/ Not reported	Real-time RT-PCR	Yes	Unclear/ Not reported	Unclear/ Not reported	Unclear/ Not reported	Unclear/ Not reported	Unclear/ Not reported
56	Seasonal and spatial dynamics of enteric viruses in wastewater and in riverine and estuarine receiving waters.	Farkas	2018	Non probabilistic	Multicenter	Prospectively	United Kingdom	Europe	Northern Europe	High-income economies	Aug/2016-Aug/2017	[2010-2020]	Untreated wastewater	Wastewater influent	Unclear/ Not reported	Real-time RT-PCR	Yes	Unclear/ Not reported	Unclear/ Not reported	Unclear/ Not reported	Unclear/ Not reported	Unclear/ Not reported
57	Detection and phylogenetic analysis of hepatitis a virus and norovirus in marine recreational waters of Mexico.	Félix	2010	Non probabilistic	Multicenter	Prospectively	Mexico	America	Central America	Upper-middle-income economies	Nov/2005-Jul/2006	[2000-2010]	Surface water	Marine recreational waters	Unclear/ Not reported	Conventional RT-PCR	Unclear/ Not reported	2 IB	Unclear/ Not reported	Unclear/ Not reported	Unclear/ Not reported	Unclear/ Not reported
58	Presence of hepatitis a virus in water and its relationship with indicators of fecal contamination.	Fernández-Molina	2004	Non probabilistic	Multicenter	Prospectively	Spain	Europe	Southern Europe	High-income economies	Unclear/ Not reported	Unclear/ Not reported	Surface water	Spring water; River water	1000	Conventional RT-PCR	Unclear/ Not reported	Unclear/ Not reported	Unclear/ Not reported	Unclear/ Not reported	Unclear/ Not reported	Unclear/ Not reported
59	Surveillance of human viral contamination and physicochemical profiles in a surface water lagoon.	Fongaro	2012	Non probabilistic	Multicenter	Prospectively	Brazil	America	South America	Upper-middle-income economies	Jun/2010-May/2011	[2010-2020]	Surface water	Surface water	Unclear/ Not reported	Real-time RT-PCR	Unclear/ Not reported	Unclear/ Not reported	Unclear/ Not reported	Unclear/ Not reported	Unclear/ Not reported	Unclear/ Not reported
60	Mineral Waste Containing High Levels of Iron from an Environmental Disaster (Bento Rodrigues, Mariana, Brazil) is Associated with Higher Titers of Enteric Viruses.	Fongaro	2019	Non probabilistic	Multicenter	Prospectively	Brazil	America	South America	Upper-middle-income economies	May/2016	[2010-2020]	Surface water	River water	1000	Real-time RT-PCR	Unclear/ Not reported	Unclear/ Not reported	Unclear/ Not reported	Unclear/ Not reported	Unclear/ Not reported	Unclear/ Not reported
61	Nested multiplex PCR assay for detection of human enteric viruses in shellfish and sewage.	Formiga-Cruz	2005	Non probabilistic	Monocenter	Prospectively	Spain	Europe	Southern Europe	High-income economies	Jun/2001-Aug/2003	[2000-2010]	Untreated wastewater	Raw sewage	42	Conventional RT-PCR	Unclear/ Not reported	Unclear/ Not reported	Unclear/ Not reported	Unclear/ Not reported	Unclear/ Not reported	Unclear/ Not reported
62	A multiplex reverse transcription-PCR method for detection of human enteric viruses in groundwater.	Fout	2003	Non probabilistic	Multicenter	Prospectively	United States of America	America	Northern America	High-income economies	Unclear/ Not reported	Unclear/ Not reported	Groundwater	Groundwater	Unclear/ Not reported	Conventional RT-PCR	Yes	Unclear/ Not reported	Unclear/ Not reported	Unclear/ Not reported	Unclear/ Not reported	Unclear/ Not reported
63	Enteric viruses’ dissemination in a private reserve of natural heritage.	Fumian	2018	Non probabilistic	Monocenter	Prospectively	Brazil	America	South America	Upper-middle-income economies	2009-2012	[2000-2010]; [2010-2020]	Surface water	River water, Lagoon water	Unclear/ Not reported	Real-time RT-PCR	Unclear/ Not reported	Unclear/ Not reported	Unclear/ Not reported	Unclear/ Not reported	Unclear/ Not reported	Unclear/ Not reported
64	Assessment of the prevalence of enteric viruses in the final effluents of two peri-urban wastewater treatment plants.	Gcilitshana	2017	Non probabilistic	Multicenter	Prospectively	South Africa	Africa	Southern Africa	Upper-middle-income economies	Sep/2012-Aug/2013	[2010-2020]	Treated wastewater	Effluent	500	Real-time RT-PCR	Unclear/ Not reported	Unclear/ Not reported	Unclear/ Not reported	Unclear/ Not reported	Unclear/ Not reported	Unclear/ Not reported
65	Quantitative detection of hepatitis A virus and enteroviruses near the United States-Mexico border and correlation with levels of fecal indicator bacteria.	Gersberg	2006	Non probabilistic	Multicenter	Prospectively	United States of America	America	Northern America	High-income economies	2003 - 2005	[2000-2010]	Surface water	Ocean water samples	Unclear/ Not reported	Real-time RT-PCR	Yes	Unclear/ Not reported	Unclear/ Not reported	Unclear/ Not reported	Unclear/ Not reported	Unclear/ Not reported
66	Characterization of outbreak hepatitis a isolates in five Tunisian childcare centers.	Gharbi-Khelifi	2011	Non probabilistic	Multicenter	Prospectively	Tunisia	Eastern Mediterranean	Northern Africa	Lower-middle income economies	Oct/2006-Dec/2006	[2000-2010]	Others	Well-water samples; Drinking water samples	Unclear/ Not reported	Conventional RT-PCR	Unclear/ Not reported	Unclear/ Not reported	Unclear/ Not reported	Unclear/ Not reported	Unclear/ Not reported	Unclear/ Not reported
67	Detection of adenovirus and enterovirus by PCR amplification in polluted waters.	Girones	1995	Non probabilistic	Multicenter	Prospectively	Spain	Europe	Southern Europe	High-income economies	Unclear/ Not reported	Unclear/ Not reported	Untreated wastewater	Sewage	40	Conventional RT-PCR	Unclear/ Not reported	Unclear/ Not reported	Unclear/ Not reported	Unclear/ Not reported	Unclear/ Not reported	Unclear/ Not reported
68	Circulation of hepatitis a genotypes in Israel 2017-2018: Environmental surveillance supports clinical findings.	Gozlan	2019	Non probabilistic	Monocenter	Prospectively	Israel	Europe	Western Asia	High-income economies	2017-2018	[2010-2020]	Untreated wastewater	Sewage sample	Unclear/ Not reported	Real-time RT-PCR	Unclear/ Not reported	31 IA; 19 IB	Unclear/ Not reported	Unclear/ Not reported	Unclear/ Not reported	Unclear/ Not reported
69	Lessons from intensified surveillance of viral hepatitis a, Israel, 2017 and 2018.	Gozlan	2021	Non probabilistic	Multicenter	Prospectively	Israel	Europe	Western Asia	High-income economies	Jan/2017-Dec/2018	[2010-2020]	Untreated wastewater	Sewage sample	Unclear/ Not reported	Real-time RT-PCR	Unclear/ Not reported	33 IA; 34 IB	Unclear/ Not reported	Unclear/ Not reported	Unclear/ Not reported	Unclear/ Not reported
70	New methods for the detection of viruses: call for review of drinking water quality guidelines.	Grabow	2001	Non probabilistic	Monocenter	Prospectively	South Africa	Africa	Southern Africa	Upper-middle-income economies	Unclear/ Not reported	Unclear/ Not reported	Drinking water	Drinking water	100000-1000000	Conventional RT-PCR	Unclear/ Not reported	Unclear/ Not reported	Buffalo green monkey kidney cells (BGMK); PLC/PRF/5 human liver cells; Colorectal adenocarcinoma cells (Caco-2)	ICC RT-PCR	413	0
71	Occurrence of water-borne enteric viruses in two settlements based in Eastern Chad: Analysis of hepatitis E virus, hepatitis A virus and human adenovirus in water sources.	Guerrero-Latorre	2011	Non probabilistic	Multicenter	Prospectively	Chad	Africa	Central Africa	Low-income economies	Unclear/ Not reported	Unclear/ Not reported	Groundwater	Wells, Boreholes	Unclear/ Not reported	Conventional RT-PCR	Unclear/ Not reported	Unclear/ Not reported	Unclear/ Not reported	Unclear/ Not reported	Unclear/ Not reported	Unclear/ Not reported
72	Detection of enteric viruses in wastewater of Monastir region by RT-PCR method.	Hassine	2010	Non probabilistic	Multicenter	Prospectively	Tunisia	Eastern Mediterranean	Northern Africa	Lower-middle income economies	Oct/2005-Jul/2006	[2000-2010]	Others	Sewage sample	100	Conventional RT-PCR	Unclear/ Not reported	Unclear/ Not reported	Unclear/ Not reported	Unclear/ Not reported	Unclear/ Not reported	Unclear/ Not reported
73	Detection of enteroviruses and mammalian reoviruses in Korean environmental waters.	Hee	2006	Non probabilistic	Monocenter	Prospectively	South Korea	Western Pacific	Eastern Asia	High-income economies	Aug/2001-Jul/2005	[2000-2010]	Drinking water	Tap water	Unclear/ Not reported	ICC Conventional RT-PCR	Unclear/ Not reported	Unclear/ Not reported	Buffalo green monkey kidney cells (BGMK)	ICC RT-PCR	33	0
74	Detection of enteroviruses and mammalian reoviruses in Korean environmental waters.	Hee	2006	Non probabilistic	Monocenter	Prospectively	South Korea	Western Pacific	Eastern Asia	High-income economies	Aug/2001-Jul/2005	[2000-2010]	Others	Finished water	Unclear/ Not reported	ICC Conventional RT-PCR	Unclear/ Not reported	Unclear/ Not reported	Buffalo green monkey kidney cells (BGMK)	ICC RT-PCR	92	0
75	Detection of enteroviruses and mammalian reoviruses in Korean environmental waters.	Hee	2006	Non probabilistic	Monocenter	Prospectively	South Korea	Western Pacific	Eastern Asia	High-income economies	Aug/2001-Jul/2005	[2000-2010]	Surface water	Surface water	Unclear/ Not reported	ICC Conventional RT-PCR	Unclear/ Not reported	Unclear/ Not reported	Buffalo green monkey kidney cells (BGMK)	ICC RT-PCR	223	0
76	Detection and characterization of hepatitis a virus and norovirus in estuarine water samples using ultrafiltration - RT-PCR integrated methods.	Hernandez-Morga	2009	Non probabilistic	Multicenter	Prospectively	Mexico	America	Central America	Upper-middle-income economies	Sep/2006-Apr/2007	[2000-2010]	Surface water	Estuarine water samples	20000	Conventional RT-PCR	Yes	21 IB	Unclear/ Not reported	Unclear/ Not reported	Unclear/ Not reported	Unclear/ Not reported
77	Detection of somatic phages, infectious enteroviruses and enterovirus genomes as indicators of human enteric viral pollution in surface water.	Hot	2003	Non probabilistic	Multicenter	Prospectively	France	Europe	Western Europe	High-income economies	Feb/1999-Jan/2000	[1986-2000]	Surface water	River water	20000	Conventional RT-PCR	Yes	Unclear/ Not reported	Unclear/ Not reported	Unclear/ Not reported	Unclear/ Not reported	Unclear/ Not reported
78	Hepatitis A and E Viruses in Wastewaters, in River Waters, and in Bivalve Molluscs in Italy.	Iaconelli	2015	Non probabilistic	Multicenter	Prospectively	Italy	Europe	Southern Europe	High-income economies	2013	[2010-2020]	Untreated wastewater	Raw sewage	500	Conventional RT-PCR	Yes	3 IA; 4 IB	Unclear/ Not reported	Unclear/ Not reported	Unclear/ Not reported	Unclear/ Not reported
79	Hepatitis A and E Viruses in Wastewaters, in River Waters, and in Bivalve Molluscs in Italy.	Iaconelli	2015	Non probabilistic	Multicenter	Prospectively	Italy	Europe	Southern Europe	High-income economies	2013	[2010-2020]	Surface water	River water	500	Conventional RT-PCR	Yes	2 IB	Unclear/ Not reported	Unclear/ Not reported	Unclear/ Not reported	Unclear/ Not reported
80	Hepatitis A and E Viruses in Wastewaters, in River Waters, and in Bivalve Molluscs in Italy.	Iaconelli	2015	Non probabilistic	Multicenter	Prospectively	Italy	Europe	Southern Europe	High-income economies	2013	[2010-2020]	Treated wastewater	Treated sewage	500	Conventional RT-PCR	Yes	2 IA; 1 IB	Unclear/ Not reported	Unclear/ Not reported	Unclear/ Not reported	Unclear/ Not reported
81	One-year Surveillance of Human Enteric Viruses in Raw and Treated Wastewaters, Downstream River Waters, and Drinking Waters.	Iaconelli	2017	Non probabilistic	Multicenter	Prospectively	Italy	Europe	Southern Europe	High-income economies	Jan/2013-Dec/2013	[2010-2020]	Untreated wastewater	Raw sewage	Unclear/ Not reported	Conventional RT-PCR	Yes	7 IB	Unclear/ Not reported	Unclear/ Not reported	Unclear/ Not reported	Unclear/ Not reported
82	One-year Surveillance of Human Enteric Viruses in Raw and Treated Wastewaters, Downstream River Waters, and Drinking Waters.	Iaconelli	2017	Non probabilistic	Multicenter	Prospectively	Italy	Europe	Southern Europe	High-income economies	Jan/2013-Dec/2013	[2010-2020]	Surface water	River water	Unclear/ Not reported	Conventional RT-PCR	Yes	Unclear/ Not reported	Unclear/ Not reported	Unclear/ Not reported	Unclear/ Not reported	Unclear/ Not reported
83	One-year Surveillance of Human Enteric Viruses in Raw and Treated Wastewaters, Downstream River Waters, and Drinking Waters.	Iaconelli	2017	Non probabilistic	Multicenter	Prospectively	Italy	Europe	Southern Europe	High-income economies	Jan/2013-Dec/2013	[2010-2020]	Treated wastewater	Treated effluent, Ultrafiltered effluent	Unclear/ Not reported	Conventional RT-PCR	Yes	5 IA	Unclear/ Not reported	Unclear/ Not reported	Unclear/ Not reported	Unclear/ Not reported
84	Detection of enteric viruses and bacterial indicators in a sewage treatment center and shallow water bay.	Janahi	2020	Non probabilistic	Monocenter	Prospectively	Bahrain	Eastern Mediterranean	Western Asia	High-income economies	Unclear/ Not reported	Unclear/ Not reported	Others	Influent; Effluent	2000	Conventional RT-PCR	Unclear/ Not reported	Unclear/ Not reported	Unclear/ Not reported	Unclear/ Not reported	Unclear/ Not reported	Unclear/ Not reported
85	Presence and fate of coliphages and enteric viruses in three wastewater treatment plants effluents and activated sludge from Tunisia.	Jebri	2012	Non probabilistic	Multicenter	Prospectively	Tunisia	Eastern Mediterranean	Northern Africa	Lower-middle income economies	Jan/2009-Aug/2009	[2000-2010]	Others	Raw water; Treated water	100	Conventional RT-PCR	Yes	Unclear/ Not reported	Unclear/ Not reported	Unclear/ Not reported	Unclear/ Not reported	Unclear/ Not reported
86	Comparison of immunological and molecular hybridization detection methods for the detection of hepatitis A virus in sewage.	Jehl-Pietri	1993	Non probabilistic	Monocenter	Prospectively	France	Europe	Western Europe	High-income economies	Unclear/ Not reported	Unclear/ Not reported	Untreated wastewater	Sewage affluent	20000	Molecular hybridization	Unclear/ Not reported	Unclear/ Not reported	Unclear/ Not reported	Unclear/ Not reported	Unclear/ Not reported	Unclear/ Not reported
87	Comparison of immunological and molecular hybridization detection methods for the detection of hepatitis A virus in sewage.	Jehl-Pietri	1993	Non probabilistic	Monocenter	Prospectively	France	Europe	Western Europe	High-income economies	Unclear/ Not reported	Unclear/ Not reported	Treated wastewater	Sewage effluent	20000	Molecular hybridization	Unclear/ Not reported	Unclear/ Not reported	Unclear/ Not reported	Unclear/ Not reported	Unclear/ Not reported	Unclear/ Not reported
88	PCR detection of pathogenic viruses in southern California urban rivers.	Jiang	2004	Non probabilistic	Multicenter	Prospectively	United States of America	America	Northern America	High-income economies	Jul/2000-Aug/2000	[1986-2000]	Surface water	River water	Unclear/ Not reported	Real-time RT-PCR	Unclear/ Not reported	Unclear/ Not reported	Unclear/ Not reported	Unclear/ Not reported	Unclear/ Not reported	Unclear/ Not reported
89	Waterborne Viruses and F-Specific Coliphages in Mixed-Use Watersheds: Microbial Associations, Host Specificities, and Affinities with Environmental/Land Use Factors.	Jones	2017	Non probabilistic	Multicenter	Prospectively	Canada	America	Northern America	High-income economies	2008-2010; 2013-2014	[2000-2010]; [2010-2020]	Surface water	River water	500	Conventional RT-PCR	Unclear/ Not reported	Unclear/ Not reported	Unclear/ Not reported	Unclear/ Not reported	Unclear/ Not reported	Unclear/ Not reported
90	Immunomagnetic capture PCR for rapid concentration and detection of hepatitis A virus from environmental samples.	Jothikumar	1998	Non probabilistic	Monocenter	Prospectively	United States of America	America	Northern America	High-income economies	Apr/1996-Dec/1996	[1986-2000]	Untreated wastewater	Raw sewage	100	Immunocapture RT-PCR	Unclear/ Not reported	Unclear/ Not reported	Unclear/ Not reported	Unclear/ Not reported	Unclear/ Not reported	Unclear/ Not reported
91	Duplex RT-PCR for simultaneous detection of hepatitis A and hepatitis E virus isolated from drinking water samples.	Jothikumar	2000	Non probabilistic	Monocenter	Prospectively	India	South-East Asia	Southern Asia	Lower-middle income economies	Unclear/ Not reported	Unclear/ Not reported	Groundwater	Bore well water samples; well water	20000	Conventional RT-PCR	Unclear/ Not reported	Unclear/ Not reported	Unclear/ Not reported	Unclear/ Not reported	Unclear/ Not reported	Unclear/ Not reported
92	Occurrence of norovirus and other enteric viruses in untreated groundwaters of Korea.	Jung	2011	Non probabilistic	Multicenter	Prospectively	South Korea	Western Pacific	Eastern Asia	High-income economies	Jul/2007-Nov/2007	[2000-2010]	Groundwater	Groundwater	500000	Conventional RT-PCR	Unclear/ Not reported	Unclear/ Not reported	Unclear/ Not reported	Unclear/ Not reported	Unclear/ Not reported	Unclear/ Not reported
93	A 1-Year Study on the Detection of Human Enteric Viruses in New Caledonia.	Kaas	2016	Non probabilistic	Monocenter	Prospectively	New Caledonia (France)	Unclear	Oceania	High-income economies	Apr/2012-Mar/2013	[2010-2020]	Untreated wastewater	Wastewater	500	Real-time RT-PCR	Yes	Unclear/ Not reported	Unclear/ Not reported	Unclear/ Not reported	Unclear/ Not reported	Unclear/ Not reported
94	Presence of enteric hepatitis viruses in the sewage and population of Greater Cairo.	Kamel	2011	Non probabilistic	Multicenter	Prospectively	Egypt	Eastern Mediterranean	Northern Africa	Lower-middle income economies	jul/2006-Aug/2007	[2000-2010]	Treated wastewater	Outlet	2000	Conventional RT-PCR	Unclear/ Not reported	3 IB	Unclear/ Not reported	Unclear/ Not reported	Unclear/ Not reported	Unclear/ Not reported
95	Presence of enteric hepatitis viruses in the sewage and population of Greater Cairo.	Kamel	2011	Non probabilistic	Multicenter	Prospectively	Egypt	Eastern Mediterranean	Northern Africa	Lower-middle income economies	jul/2006-Aug/2007	[2000-2010]	Untreated wastewater	Inlet	2000	Conventional RT-PCR	Unclear/ Not reported	8 IB	Unclear/ Not reported	Unclear/ Not reported	Unclear/ Not reported	Unclear/ Not reported
96	Genomic copy concentrations of selected waterborne viruses in a slum environment in Kampala, Uganda.	Katukiza	2013	Probabilistic	Multicenter	Prospectively	Uganda	Africa	Eastern Africa	Low-income economies	Jan/2011-Feb/2011	[2010-2020]	Others	Grey water	10000	Real-time RT-PCR	Yes	Unclear/ Not reported	Unclear/ Not reported	Unclear/ Not reported	Unclear/ Not reported	Unclear/ Not reported
97	Genomic copy concentrations of selected waterborne viruses in a slum environment in Kampala, Uganda.	Katukiza	2013	Probabilistic	Multicenter	Prospectively	Uganda	Africa	Eastern Africa	Low-income economies	Jan/2011-Feb/2011	[2010-2020]	Surface water	Surface water	10000	Real-time RT-PCR	Yes	Unclear/ Not reported	Unclear/ Not reported	Unclear/ Not reported	Unclear/ Not reported	Unclear/ Not reported
98	Detection of poliovirus, hepatitis A virus and rotavirus from sewage and water samples.	Kittigul	2000	Non probabilistic	Multicenter	Prospectively	Thailand	South-East Asia	Southeastern Asia	Upper-middle-income economies	Feb/1998-Jun/1998	[1986-2000]	Drinking water	Tap water	1000	Conventional RT-PCR	Unclear/ Not reported	Unclear/ Not reported	Unclear/ Not reported	Unclear/ Not reported	Unclear/ Not reported	Unclear/ Not reported
99	Detection of poliovirus, hepatitis A virus and rotavirus from sewage and water samples.	Kittigul	2000	Non probabilistic	Multicenter	Prospectively	Thailand	South-East Asia	Southeastern Asia	Upper-middle-income economies	Feb/1998-Jun/1998	[1986-2000]	Surface water	Surface water from canals	1000	Conventional RT-PCR	Unclear/ Not reported	Unclear/ Not reported	Unclear/ Not reported	Unclear/ Not reported	Unclear/ Not reported	Unclear/ Not reported
100	Detection of poliovirus, hepatitis A virus and rotavirus from sewage and water samples.	Kittigul	2000	Non probabilistic	Multicenter	Prospectively	Thailand	South-East Asia	Southeastern Asia	Upper-middle-income economies	Feb/1998-Jun/1998	[1986-2000]	Untreated wastewater	Sewage	1000	Conventional RT-PCR	Unclear/ Not reported	Unclear/ Not reported	Unclear/ Not reported	Unclear/ Not reported	Unclear/ Not reported	Unclear/ Not reported
101	Detection and characterization of hepatitis A virus in water samples in Thailand.	Kittigul	2006	Non probabilistic	Monocenter	Prospectively	Thailand	South-East Asia	Southeastern Asia	Upper-middle-income economies	Aug/2001-Dec/2001	[2000-2010]	Drinking water	Tap water	1000	Real-time RT-PCR	Unclear/ Not reported	Unclear/ Not reported	Unclear/ Not reported	Unclear/ Not reported	Unclear/ Not reported	Unclear/ Not reported
102	Detection and characterization of hepatitis A virus in water samples in Thailand.	Kittigul	2006	Non probabilistic	Monocenter	Prospectively	Thailand	South-East Asia	Southeastern Asia	Upper-middle-income economies	Aug/2001-Dec/2001	[2000-2010]	Surface water	Swamps; Canals	1000	Real-time RT-PCR	Unclear/ Not reported	2 IA	Unclear/ Not reported	Unclear/ Not reported	Unclear/ Not reported	Unclear/ Not reported
103	The detection of enteric viruses in selected urban and rural river water and sewage in Kenya, with special reference to rotaviruses.	Kiulia	2010	Non probabilistic	Monocenter	Prospectively	Kenya	Africa	Eastern Africa	Lower-middle income economies	May/2007-Feb/2008	[2000-2010]	Surface water	River water	10000	Conventional RT-PCR	Unclear/ Not reported	Unclear/ Not reported	Unclear/ Not reported	Unclear/ Not reported	Unclear/ Not reported	Unclear/ Not reported
104	The detection of enteric viruses in selected urban and rural river water and sewage in Kenya, with special reference to rotaviruses.	Kiulia	2010	Non probabilistic	Monocenter	Prospectively	Kenya	Africa	Eastern Africa	Lower-middle income economies	May/2007-Feb/2008	[2000-2010]	Untreated wastewater	Raw sewage samples	10000	Conventional RT-PCR	Unclear/ Not reported	Unclear/ Not reported	Unclear/ Not reported	Unclear/ Not reported	Unclear/ Not reported	Unclear/ Not reported
105	Molecular typing of enteroviruses, adenoviruses, and hepatitis a viruses in untreated and treated sewage of a biological treatment plant in Greece.	Kokkinos	2010	Non probabilistic	Monocenter	Prospectively	Greece	Europe	Southern Europe	High-income economies	May/2007-Dec/2007	[2000-2010]	Treated wastewater	Outlet	Unclear/ Not reported	Conventional RT-PCR	Unclear/ Not reported	Unclear/ Not reported	Unclear/ Not reported	Unclear/ Not reported	Unclear/ Not reported	Unclear/ Not reported
106	Molecular typing of enteroviruses, adenoviruses, and hepatitis a viruses in untreated and treated sewage of a biological treatment plant in Greece.	Kokkinos	2010	Non probabilistic	Monocenter	Prospectively	Greece	Europe	Southern Europe	High-income economies	May/2007-Dec/2007	[2000-2010]	Untreated wastewater	Inlet	Unclear/ Not reported	Conventional RT-PCR	Unclear/ Not reported	Unclear/ Not reported	Unclear/ Not reported	Unclear/ Not reported	Unclear/ Not reported	Unclear/ Not reported
107	Environmental surveillance. An additional/alternative approach for virological surveillance in Greece?	Kokkinos	2011	Non probabilistic	Monocenter	Prospectively	Greece	Europe	Southern Europe	High-income economies	Nov/2007-Jul/2009	[2000-2010]	Untreated wastewater	Untreated sewage	Unclear/ Not reported	Conventional RT-PCR	Unclear/ Not reported	4 IA	Unclear/ Not reported	Unclear/ Not reported	Unclear/ Not reported	Unclear/ Not reported
108	Assessment of the Virological Quality of Marine and Running Surface Waters in NW Greece: A Case Study.	Kokkinos	2018	Non probabilistic	Multicenter	Prospectively	Greece	Europe	Southern Europe	High-income economies	Oct/2012-Sep/2013	[2010-2020]	Surface water	Seawater; River water	1000	Real-time RT-PCR	Unclear/ Not reported	Unclear/ Not reported	Unclear/ Not reported	Unclear/ Not reported	Unclear/ Not reported	Unclear/ Not reported
109	Hepatitis A Virus Strains Circulating in the Campania Region (2015-2018) Assessed through Bivalve Biomonitoring and Environmental Surveillance.	La Rosa	2021	Non probabilistic	Multicenter	Prospectively	Italy	Europe	Southern Europe	High-income economies	2015-2018	[2010-2020]	Surface water	Seawater; Discharge water	20000	Conventional RT-PCR	Yes	13 IA; 6 IB	Unclear/ Not reported	Unclear/ Not reported	Unclear/ Not reported	Unclear/ Not reported
110	Hepatitis A Virus Strains Circulating in the Campania Region (2015-2018) Assessed through Bivalve Biomonitoring and Environmental Surveillance.	La Rosa	2021	Non probabilistic	Multicenter	Prospectively	Italy	Europe	Southern Europe	High-income economies	2015-2018	[2010-2020]	Untreated wastewater	Sewage sample	20000	Conventional RT-PCR	Yes	18 IA; 2 IB	Unclear/ Not reported	Unclear/ Not reported	Unclear/ Not reported	Unclear/ Not reported
111	Surveillance of hepatitis A virus in urban sewages and comparison with cases notified in the course of an outbreak, Italy 2013.	La Rosa	2014	Non probabilistic	Nationally representative	Prospectively	Italy	Europe	Southern Europe	High-income economies	Jul/2012-Sep/2013	[2010-2020]	Untreated wastewater	Sewage sample	20	Conventional RT-PCR	Yes	4 IA; 34 IB	Unclear/ Not reported	Unclear/ Not reported	Unclear/ Not reported	Unclear/ Not reported
112	The impact of anthropogenic pressure on the virological quality of water from the Tiber River, Italy.	La Rosa	2017	Non probabilistic	Multicenter	Prospectively	Italy	Europe	Southern Europe	High-income economies	Mar/2014-Nov/2015	[2010-2020]	Surface water	River water	20-50	Conventional RT-PCR	Yes	2 IA; 1 IB	Unclear/ Not reported	Unclear/ Not reported	Unclear/ Not reported	Unclear/ Not reported
113	Presence of Human and Animal Viruses in Surface Waters in Vojvodina Province of Serbia.	Lazić	2015	Probabilistic	Multicenter	Prospectively	Serbia	Europe	Southern Europe	Upper-middle-income economies	Jul/2013-Dec/2013	[2010-2020]	Surface water	Untreated surface water	10000	Real-time RT-PCR	Yes	Unclear/ Not reported	Unclear/ Not reported	Unclear/ Not reported	Unclear/ Not reported	Unclear/ Not reported
114	Molecular detection of human enteric viruses in urban rivers in Korea.	Lee	2008	Non probabilistic	Multicenter	Prospectively	South Korea	Western Pacific	Eastern Asia	High-income economies	May/2002-Mar/2003	[2000-2010]	Surface water	River water	Unclear/ Not reported	Conventional RT-PCR	Unclear/ Not reported	Unclear/ Not reported	Unclear/ Not reported	Unclear/ Not reported	Unclear/ Not reported	Unclear/ Not reported
115	Incidence and molecular characterization of hepatitis A viruses in Korean surface water between 2007 and 2010.	Lee	2014	Non probabilistic	Multicenter	Prospectively	South Korea	Western Pacific	Eastern Asia	High-income economies	Feb/2007-Sep/2010	[2000-2010]	Surface water	Surface water	Unclear/ Not reported	Conventional RT-PCR	Unclear/ Not reported	2 IA; 7 IB	Unclear/ Not reported	Unclear/ Not reported	Unclear/ Not reported	Unclear/ Not reported
116	Hydrologic, land cover, and seasonal patterns of waterborne pathogens in Great Lakes tributaries.	Lenaker	2017	Non probabilistic	Multicenter	Prospectively	United States of America	America	Northern America	High-income economies	Feb/2011-Jun/2013	[2010-2020]	Surface water	River water	Unclear/ Not reported	Real-time RT-PCR	Yes	Unclear/ Not reported	Unclear/ Not reported	Unclear/ Not reported	Unclear/ Not reported	Unclear/ Not reported
117	Enteric Viruses in Surface Waters from Argentina: Molecular and Viable-Virus Detection.	Masachessi	2018	Non probabilistic	Multicenter	Prospectively	Argentina	America	South America	Upper-middle-income economies	Jan/2012-Oct/2015	[2010-2020]	Surface water	Dam water sample, beaches water sample	1500	Conventional RT-PCR	Yes	11 IA	Unclear/ Not reported	Unclear/ Not reported	Unclear/ Not reported	Unclear/ Not reported
118	Assessment of water quality in a border region between the Atlantic forest and an urbanised area in Rio de Janeiro, Brazil.	Miagostovich	2014	Non probabilistic	Multicenter	Prospectively	Brazil	America	South America	Upper-middle-income economies	Jun/2008-May/2009	[2000-2010]	Surface water	Surface water	2000	Real-time RT-PCR	Yes	Unclear/ Not reported	Unclear/ Not reported	Unclear/ Not reported	Unclear/ Not reported	Unclear/ Not reported
119	Detection of hepatitis A virus in concentrated river water by polymerase chain reaction.	Morace	1993	Non probabilistic	Monocenter	Prospectively	Italy	Europe	Southern Europe	High-income economies	Unclear/ Not reported	Unclear/ Not reported	Surface water	River water	Unclear/ Not reported	Conventional RT-PCR	Unclear/ Not reported	Unclear/ Not reported	Unclear/ Not reported	Unclear/ Not reported	Unclear/ Not reported	Unclear/ Not reported
120	Microbiological and physicochemical analysis of the coastal waters of southern Brazil.	Moresco	2012	Non probabilistic	Multicenter	Prospectively	Brazil	America	South America	Upper-middle-income economies	Aug/2009-Jul/2010	[2000-2010]	Surface water	Seawater	10000	Real-time RT-PCR	Yes	Unclear/ Not reported	Unclear/ Not reported	Unclear/ Not reported	Unclear/ Not reported	Unclear/ Not reported
121	Detection and Phylogenetic Analysis of Hepatitis A Virus in the Wastewater Treatment Plant of Ekbatan Town in Tehran, Iran.	Nasiri	2021	Non probabilistic	Multicenter	Prospectively	Iran	Eastern Mediterranean	Southern Asia	Upper-middle-income economies	2019	[2010-2020]	Others	Inﬂuent, before chlorination, eﬄuent	Unclear/ Not reported	Conventional RT-PCR	Unclear/ Not reported	10 IB	Unclear/ Not reported	Unclear/ Not reported	Unclear/ Not reported	Unclear/ Not reported
122	An A-ELISA to detect hepatitis A virus in estuarine samples.	Nasser	1987	Non probabilistic	Monocenter	Prospectively	United States of America	America	Northern America	High-income economies	Apr/1986-Oct/1986	[1986-2000]	Surface water	Seawater	Unclear/ Not reported	Direct ELISA	Unclear/ Not reported	Unclear/ Not reported	Unclear/ Not reported	Unclear/ Not reported	Unclear/ Not reported	Unclear/ Not reported
123	Detection and characterization of enteric viruses in flood water from the 2011 thai flood.	Ngaosuwankul	2013	Non probabilistic	Multicenter	Prospectively	Thailand	South-East Asia	Southeastern Asia	Upper-middle-income economies	2011	[2010-2020]	Surface water	Flood water samples	400_1000	Conventional RT-PCR	Unclear/ Not reported	7 IA	Unclear/ Not reported	Unclear/ Not reported	Unclear/ Not reported	Unclear/ Not reported
124	Viruses in drinking water: HAV and enteroviruses.	Numanović	2004	Non probabilistic	Monocenter	Prospectively	Bosnia and Herzegovina	Europe	Southern Europe	Upper-middle-income economies	Unclear/ Not reported	Unclear/ Not reported	Drinking water	Drinking water	Unclear/ Not reported	Conventional RT-PCR	Unclear/ Not reported	Unclear/ Not reported	Unclear/ Not reported	Unclear/ Not reported	Unclear/ Not reported	Unclear/ Not reported
125	Viral diversity and abundance in polluted waters in Kampala, Uganda.	O'Brien	2017	Non probabilistic	Multicenter	Prospectively	Uganda	Africa	Eastern Africa	Low-income economies	2016	[2010-2020]	Surface water	Swamp	Unclear/ Not reported	Real-time RT-PCR	Unclear/ Not reported	Unclear/ Not reported	Unclear/ Not reported	Unclear/ Not reported	Unclear/ Not reported	Unclear/ Not reported
126	Viral diversity and abundance in polluted waters in Kampala, Uganda.	O'Brien	2017	Non probabilistic	Multicenter	Prospectively	Uganda	Africa	Eastern Africa	Low-income economies	2016	[2010-2020]	Treated wastewater	Sewage effluent	Unclear/ Not reported	Real-time RT-PCR	Unclear/ Not reported	Unclear/ Not reported	Unclear/ Not reported	Unclear/ Not reported	Unclear/ Not reported	Unclear/ Not reported
127	Viral diversity and abundance in polluted waters in Kampala, Uganda.	O'Brien	2017	Non probabilistic	Multicenter	Prospectively	Uganda	Africa	Eastern Africa	Low-income economies	2016	[2010-2020]	Untreated wastewater	Sewage influent	Unclear/ Not reported	Real-time RT-PCR	Unclear/ Not reported	Unclear/ Not reported	Unclear/ Not reported	Unclear/ Not reported	Unclear/ Not reported	Unclear/ Not reported
128	Incidence of human adenoviruses and Hepatitis A virus in the final effluent of selected wastewater treatment plants in Eastern Cape Province, South Africa.	Osuolale	2015	Non probabilistic	Multicenter	Prospectively	South Africa	Africa	Southern Africa	Upper-middle-income economies	Sep/2012-Aug/2013	[2010-2020]	Treated wastewater	Sewage effluent	1250	Real-time RT-PCR	Unclear/ Not reported	Unclear/ Not reported	Unclear/ Not reported	Unclear/ Not reported	Unclear/ Not reported	Unclear/ Not reported
129	Efficiency of hepatitis A virus removal in six sewage treatment plants from central Tunisia.	Ouardani	2015	Non probabilistic	Multicenter	Prospectively	Tunisia	Eastern Mediterranean	Northern Africa	Lower-middle income economies	Dec/2009-Dec/2010	[2000-2010]	Treated wastewater	Treated sewage influent	100	Real-time RT-PCR	Yes	92 IA	Unclear/ Not reported	Unclear/ Not reported	Unclear/ Not reported	Unclear/ Not reported
130	Efficiency of hepatitis A virus removal in six sewage treatment plants from central Tunisia.	Ouardani	2015	Non probabilistic	Multicenter	Prospectively	Tunisia	Eastern Mediterranean	Northern Africa	Lower-middle income economies	Dec/2009-Dec/2010	[2000-2010]	Untreated wastewater	Raw sewage effluent	100	Real-time RT-PCR	Yes	37 IA	Unclear/ Not reported	Unclear/ Not reported	Unclear/ Not reported	Unclear/ Not reported
131	Detection and Molecular Characterization of Hepatitis A Virus from Tunisian Wastewater Treatment Plants with Different Secondary Treatments.	Ouardani	2016	Non probabilistic	Multicenter	Prospectively	Tunisia	Eastern Mediterranean	Northern Africa	Lower-middle income economies	Dec/2009-Dec/2010	[2000-2010]	Treated wastewater	Treated sewage	100	Real-time RT-PCR	Yes	130 IA; 11 IB	Unclear/ Not reported	Unclear/ Not reported	Unclear/ Not reported	Unclear/ Not reported
132	Detection and Molecular Characterization of Hepatitis A Virus from Tunisian Wastewater Treatment Plants with Different Secondary Treatments.	Ouardani	2016	Non probabilistic	Multicenter	Prospectively	Tunisia	Eastern Mediterranean	Northern Africa	Lower-middle income economies	Dec/2009-Dec/2010	[2000-2010]	Untreated wastewater	Raw sewage	100	Real-time RT-PCR	Yes	130 IA; 11 IB	Unclear/ Not reported	Unclear/ Not reported	Unclear/ Not reported	Unclear/ Not reported
133	Presence of enteric viruses in water samples for consumption in Colombia: Challenges for supply systems.	Peláez	2016	Non probabilistic	Monocenter	Retrospectively	Colombia	America	South America	Upper-middle-income economies	2008-2014	[2000-2010]; [2010-2020]	Others	Untreated wastewater; Treated wastewater	Unclear/ Not reported	Conventional RT-PCR	Unclear/ Not reported	Unclear/ Not reported	Unclear/ Not reported	Unclear/ Not reported	Unclear/ Not reported	Unclear/ Not reported
134	Molecular Characterization and Phylogenetic Analysis of Enteroviruses and Hepatitis A Viruses in Sewage Samples, Northern Italy, 2016.	Pellegrinelli	2019	Non probabilistic	Monocenter	Prospectively	Italy	Europe	Southern Europe	High-income economies	2016	[2010-2020]	Untreated wastewater	Influent	500	Conventional RT-PCR	Unclear/ Not reported	5 IA	Unclear/ Not reported	Unclear/ Not reported	Unclear/ Not reported	Unclear/ Not reported
135	Presence and environmental circulation of enteric viruses in three different wastewater treatment plants.	Petrinca	2009	Non probabilistic	Multicenter	Prospectively	Italy	Europe	Southern Europe	High-income economies	2002-2003	[2000-2010]	Treated wastewater	Sewage effluent	Unclear/ Not reported	Conventional RT-PCR	Unclear/ Not reported	14 IA; 3 IB	Unclear/ Not reported	Unclear/ Not reported	Unclear/ Not reported	Unclear/ Not reported
136	Presence and environmental circulation of enteric viruses in three different wastewater treatment plants.	Petrinca	2009	Non probabilistic	Multicenter	Prospectively	Italy	Europe	Southern Europe	High-income economies	2002-2003	[2000-2010]	Untreated wastewater	Sewage influent	Unclear/ Not reported	Conventional RT-PCR	Unclear/ Not reported	Unclear/ Not reported	Unclear/ Not reported	Unclear/ Not reported	Unclear/ Not reported	Unclear/ Not reported
137	Immune electron microscopy in the detection of viruses other than enteroviruses on cell culture in untreated sewage.	Pietri	1988	Non probabilistic	Monocenter	Prospectively	France	Europe	Western Europe	High-income economies	Unclear/ Not reported	Unclear/ Not reported	Untreated wastewater	Sewage sample	Unclear/ Not reported	Culture + Electron microscopy	Unclear/ Not reported	Unclear/ Not reported	Unclear/ Not reported	Culture + Electron microscopy	15	5
138	Viral pollution in the environment and in shellfish: human adenovirus detection by PCR as an index of human viruses.	Pina	1998	Non probabilistic	Multicenter	Prospectively	Spain	Europe	Southern Europe	High-income economies	1994-1996	[1986-2000]	Others	Slaughterhouse sewage	40	Conventional RT-PCR	Yes	Unclear/ Not reported	Unclear/ Not reported	Unclear/ Not reported	Unclear/ Not reported	Unclear/ Not reported
139	Viral pollution in the environment and in shellfish: human adenovirus detection by PCR as an index of human viruses.	Pina	1998	Non probabilistic	Multicenter	Prospectively	Spain	Europe	Southern Europe	High-income economies	1994-1996	[1986-2000]	Surface water	River water; Seawater	500-50000	Conventional RT-PCR	Yes	Unclear/ Not reported	Unclear/ Not reported	Unclear/ Not reported	Unclear/ Not reported	Unclear/ Not reported
140	Viral pollution in the environment and in shellfish: human adenovirus detection by PCR as an index of human viruses.	Pina	1998	Non probabilistic	Multicenter	Prospectively	Spain	Europe	Southern Europe	High-income economies	1994-1996	[1986-2000]	Untreated wastewater	Raw domestic sewage water	40	Conventional RT-PCR	Yes	Unclear/ Not reported	Unclear/ Not reported	Unclear/ Not reported	Unclear/ Not reported	Unclear/ Not reported
141	Genetic analysis of hepatitis A virus strains recovered from the environment and from patients with acute hepatitis.	Pina	2001	Non probabilistic	Monocenter	Prospectively	Spain	Europe	Southern Europe	High-income economies	1994-2000	[1986-2000]	Surface water	River water	Unclear/ Not reported	Conventional RT-PCR	Yes	Unclear/ Not reported	Unclear/ Not reported	Unclear/ Not reported	Unclear/ Not reported	Unclear/ Not reported
142	Genetic analysis of hepatitis A virus strains recovered from the environment and from patients with acute hepatitis.	Pina	2001	Non probabilistic	Monocenter	Prospectively	Spain	Europe	Southern Europe	High-income economies	1994-2000	[1986-2000]	Untreated wastewater	Raw sewage sample	40	Conventional RT-PCR	Yes	16 IA; 15 IB; 2 IIIA	Unclear/ Not reported	Unclear/ Not reported	Unclear/ Not reported	Unclear/ Not reported
143	Hepatitis A virus in urban sewage from two Mediterranean countries.	Pintó	2007	Non probabilistic	Multicenter	Prospectively	Egypt	Eastern Mediterranean	Northern Africa	Lower-middle income economies	Nov/1998-Dec/2002	[1986-2000]; [2000-2010]	Untreated wastewater	Raw sewage	Unclear/ Not reported	Conventional RT-PCR	Unclear/ Not reported	20 IB	Unclear/ Not reported	Unclear/ Not reported	Unclear/ Not reported	Unclear/ Not reported
144	Hepatitis A virus in urban sewage from two Mediterranean countries.	Pintó	2007	Non probabilistic	Multicenter	Prospectively	Spain	Europe	Southern Europe	High-income economies	Nov/1998-Dec/2002	[1986-2000]; [2000-2010]	Untreated wastewater	Raw sewage	Unclear/ Not reported	Conventional RT-PCR	Unclear/ Not reported	3 IB	Unclear/ Not reported	Unclear/ Not reported	Unclear/ Not reported	Unclear/ Not reported
145	Quantification and molecular characterization of enteric viruses detected in effluents from two hospital wastewater treatment plants.	Prado	2011	Non probabilistic	Monocenter	Prospectively	Brazil	America	South America	Upper-middle-income economies	2005-2008	[2000-2010]	Untreated wastewater	Raw sewage	Unclear/ Not reported	Conventional RT-PCR	Unclear/ Not reported	4 IA; 1 IB	Unclear/ Not reported	Unclear/ Not reported	Unclear/ Not reported	Unclear/ Not reported
146	Quantification and molecular characterization of enteric viruses detected in effluents from two hospital wastewater treatment plants.	Prado	2011	Non probabilistic	Monocenter	Prospectively	Brazil	America	South America	Upper-middle-income economies	2005-2008	[2000-2010]	Treated wastewater	Effluent water	Unclear/ Not reported	Conventional RT-PCR	Unclear/ Not reported	7 IA; 1 IB	Unclear/ Not reported	Unclear/ Not reported	Unclear/ Not reported	Unclear/ Not reported
147	Monitoring the hepatitis A virus in urban wastewater from Rio de Janeiro, Brazil.	Prado	2012	Non probabilistic	Monocenter	Prospectively	Brazil	America	South America	Upper-middle-income economies	Aug/2009-Jul/2010	[2000-2010]	Treated wastewater	Treated effluent samples	42	Real-time RT-PCR	Unclear/ Not reported	Unclear/ Not reported	Unclear/ Not reported	Unclear/ Not reported	Unclear/ Not reported	Unclear/ Not reported
148	Monitoring the hepatitis A virus in urban wastewater from Rio de Janeiro, Brazil.	Prado	2012	Non probabilistic	Monocenter	Prospectively	Brazil	America	South America	Upper-middle-income economies	Aug/2009-Jul/2010	[2000-2010]	Untreated wastewater	Raw sewage	42	Real-time RT-PCR	Unclear/ Not reported	4 IA	Unclear/ Not reported	Unclear/ Not reported	Unclear/ Not reported	Unclear/ Not reported
149	Hepatitis A Outbreaks and Environmental Circulation of Genotype IA Strains in the São Paulo City, 2017-2018.	Prado	2021	Non probabilistic	Multicenter	Prospectively	Brazil	America	South America	Upper-middle-income economies	Nov/2017-Nov/2018	[2010-2020]	Untreated wastewater	Raw sewage	2000	Real-time RT-PCR	Unclear/ Not reported	8 IA	Unclear/ Not reported	Unclear/ Not reported	Unclear/ Not reported	Unclear/ Not reported
150	Large scale survey of enteric viruses in river and waste water underlines the health status of the local population.	Prevost	2015	Non probabilistic	Multicenter	Prospectively	France	Europe	Western Europe	High-income economies	May/2013-May/2014	[2010-2020]	Surface water	River water, water samples from the tributaries	10000	Real-time RT-PCR	Yes	Unclear/ Not reported	Unclear/ Not reported	Unclear/ Not reported	Unclear/ Not reported	Unclear/ Not reported
151	Large scale survey of enteric viruses in river and waste water underlines the health status of the local population.	Prevost	2015	Non probabilistic	Multicenter	Prospectively	France	Europe	Western Europe	High-income economies	May/2013-May/2014	[2010-2020]	Treated wastewater	Effluent water	10000	Real-time RT-PCR	Yes	Unclear/ Not reported	Unclear/ Not reported	Unclear/ Not reported	Unclear/ Not reported	Unclear/ Not reported
152	Human virus detection in drinking water in Zagreb from 1991 to 1994.	Puntaric	1995	Non probabilistic	Monocenter	Prospectively	Croatia	Europe	Southern Europe	High-income economies	1991-1994	[1986-2000]	Drinking water	Drinking water	Unclear/ Not reported	Countercurrent immuno-osmophoresis	Unclear/ Not reported	Unclear/ Not reported	Unclear/ Not reported	Unclear/ Not reported	Unclear/ Not reported	Unclear/ Not reported
153	Molecular characterization of human enteric viruses in food, water samples, and surface swabs in Sicily.	Purpari	2019	Non probabilistic	Multicenter	Prospectively	Italy	Europe	Southern Europe	High-income economies	2012-2017	[2010-2020]	Drinking water	Pipewater	10000	Real-time RT-PCR	Unclear/ Not reported	Unclear/ Not reported	Unclear/ Not reported	Unclear/ Not reported	Unclear/ Not reported	Unclear/ Not reported
154	Molecular characterization of human enteric viruses in food, water samples, and surface swabs in Sicily.	Purpari	2019	Non probabilistic	Multicenter	Prospectively	Italy	Europe	Southern Europe	High-income economies	2012-2017	[2010-2020]	Surface water	Seawater	10000	Real-time RT-PCR	Unclear/ Not reported	Unclear/ Not reported	Unclear/ Not reported	Unclear/ Not reported	Unclear/ Not reported	Unclear/ Not reported
155	Detection of enteric viruses and bacterial indicators in German environmental waters.	Pusch	2005	Non probabilistic	Multicenter	Prospectively	Germany	Europe	Western Europe	High-income economies	Oct/2002-Sep/2003	[2000-2010]	Surface water	Lakeshore	Unclear/ Not reported	Conventional RT-PCR	Unclear/ Not reported	Unclear/ Not reported	Unclear/ Not reported	Unclear/ Not reported	Unclear/ Not reported	Unclear/ Not reported
156	Detection of enteric viruses and bacterial indicators in German environmental waters.	Pusch	2005	Non probabilistic	Multicenter	Prospectively	Germany	Europe	Western Europe	High-income economies	Oct/2002-Sep/2003	[2000-2010]	Treated wastewater	Sewage plant outflow	Unclear/ Not reported	Conventional RT-PCR	Unclear/ Not reported	Unclear/ Not reported	Unclear/ Not reported	Unclear/ Not reported	Unclear/ Not reported	Unclear/ Not reported
157	Potentially infectious novel hepatitis a virus strains detected in selected treated wastewater discharge sources, South Africa.	Rachida	2020	Non probabilistic	Multicenter	Prospectively	South Africa	Africa	Southern Africa	Upper-middle-income economies	Apr/2015-Mar/2016	[2010-2020]	Surface water	Dam water	Unclear/ Not reported	Real-time RT-PCR	Yes	Unclear/ Not reported	Unclear/ Not reported	Unclear/ Not reported	Unclear/ Not reported	Unclear/ Not reported
158	Potentially infectious novel hepatitis a virus strains detected in selected treated wastewater discharge sources, South Africa.	Rachida	2020	Non probabilistic	Multicenter	Prospectively	South Africa	Africa	Southern Africa	Upper-middle-income economies	Apr/2015-Mar/2016	[2010-2020]	Treated wastewater	Treated wastewater discharge	Unclear/ Not reported	Real-time RT-PCR	Yes	43 IB	Unclear/ Not reported	Unclear/ Not reported	Unclear/ Not reported	Unclear/ Not reported
159	Potentially infectious novel hepatitis a virus strains detected in selected treated wastewater discharge sources, South Africa.	Rachida	2020	Non probabilistic	Multicenter	Prospectively	South Africa	Africa	Southern Africa	Upper-middle-income economies	Apr/2015-Mar/2016	[2010-2020]	Untreated wastewater	Sewage inflow	1000	Real-time RT-PCR	Yes	43 IB	Unclear/ Not reported	Unclear/ Not reported	Unclear/ Not reported	Unclear/ Not reported
160	Genetic characterization of a novel hepatitis a virus strain in irrigation water in South Africa.	Rachida	2016	Non probabilistic	Monocenter	Prospectively	South Africa	Africa	Southern Africa	Upper-middle-income economies	Unclear/ Not reported	Unclear/ Not reported	Others	Irrigation water	Unclear/ Not reported	Real-time RT-PCR	Unclear/ Not reported	1 V	Unclear/ Not reported	Unclear/ Not reported	Unclear/ Not reported	Unclear/ Not reported
161	Assessment of adenovirus, hepatitis A virus and rotavirus presence in environmental samples in Florianopolis, South Brazil.	Rigotto	2010	Non probabilistic	Multicenter	Prospectively	Brazil	America	South America	Upper-middle-income economies	Jun/2007-May/2008	[2000-2010]	Drinking water	Drinking water	Unclear/ Not reported	Conventional RT-PCR	Yes	Unclear/ Not reported	Fetal rhesus monkey kidney (FRHK-4); Hep-2; African rhesus monkey kidney cells (MA104)	ICC RT-PCR	2	0
162	Assessment of adenovirus, hepatitis A virus and rotavirus presence in environmental samples in Florianopolis, South Brazil.	Rigotto	2010	Non probabilistic	Multicenter	Prospectively	Brazil	America	South America	Upper-middle-income economies	Jun/2007-May/2008	[2000-2010]	Surface water	Lagoon water, Polluted creek, Seawater	Unclear/ Not reported	Conventional RT-PCR	Yes	Unclear/ Not reported	Fetal rhesus monkey kidney (FRHK-4); Hep-2; African rhesus monkey kidney cells (MA104)	ICC RT-PCR	5	0
163	Analysis of the evolution in the circulation of HAV and HEV in Eastern Spain by testing urban sewage samples.	Rodriguez-manzano	2010	Non probabilistic	Multicenter	Prospectively	Spain	Europe	Southern Europe	High-income economies	2000-2008	[2000-2010]	Untreated wastewater	Sewage influent	42	Conventional RT-PCR	Unclear/ Not reported	5 IA; 2 IB	Unclear/ Not reported	Unclear/ Not reported	Unclear/ Not reported	Unclear/ Not reported
164	Standard and new faecal indicators and pathogens in sewage treatment plants, microbiological parameters for improving the control of reclaimed water.	Rodriguez-Manzano	2012	Non probabilistic	Multicenter	Prospectively	Spain	Europe	Southern Europe	High-income economies	Oct/2009-Feb/2010	[2000-2010]	Treated wastewater	Treated sewage sample	Unclear/ Not reported	Conventional RT-PCR	Unclear/ Not reported	Unclear/ Not reported	Unclear/ Not reported	Unclear/ Not reported	Unclear/ Not reported	Unclear/ Not reported
165	Standard and new faecal indicators and pathogens in sewage treatment plants, microbiological parameters for improving the control of reclaimed water.	Rodriguez-Manzano	2012	Non probabilistic	Multicenter	Prospectively	Spain	Europe	Southern Europe	High-income economies	Oct/2009-Feb/2010	[2000-2010]	Untreated wastewater	Raw sewage sample	Unclear/ Not reported	Conventional RT-PCR	Unclear/ Not reported	Unclear/ Not reported	Unclear/ Not reported	Unclear/ Not reported	Unclear/ Not reported	Unclear/ Not reported
166	Genomic detection of waterborne enteric viruses as water quality indicators in Al-Zarqa River, Jordan.	Saadoun	2021	Non probabilistic	Multicenter	Prospectively	Jordan	Eastern Mediterranean	Western Asia	Upper-middle-income economies	Unclear/ Not reported	Unclear/ Not reported	Others	Raw sewage; Treated sewage; Surface and pond water	1000	Conventional RT-PCR	Yes	Unclear/ Not reported	Unclear/ Not reported	Unclear/ Not reported	Unclear/ Not reported	Unclear/ Not reported
167	Molecular characterisation of hepatitis A virus strains from water sources in South Africa.	Said	2014	Non probabilistic	Multicenter	Prospectively	South Africa	Africa	Southern Africa	Upper-middle-income economies	Aug/2010-Dec/2011	[2010-2020]	Surface water	Surface water sample	10000	Real-time RT-PCR	Yes	15 IB	Unclear/ Not reported	Unclear/ Not reported	Unclear/ Not reported	Unclear/ Not reported
168	Molecular characterisation of hepatitis A virus strains from water sources in South Africa.	Said	2014	Non probabilistic	Multicenter	Retrospectively	South Africa	Africa	Southern Africa	Upper-middle-income economies	Aug/2010-Dec/2011	[2010-2020]	Treated wastewater	Outflow wastewater sample	75-100	Real-time RT-PCR	Unclear/ Not reported	17 IB	Unclear/ Not reported	Unclear/ Not reported	Unclear/ Not reported	Unclear/ Not reported
169	Detection of enteric viruses in sewage sludge and treated wastewater effluent.	Schlindwein	2010	Non probabilistic	Monocenter	Prospectively	Brazil	America	South America	Upper-middle-income economies	Jun/2007-May/2008	[2000-2010]	Treated wastewater	Treated wastewater efluent	Unclear/ Not reported	Conventional RT-PCR	Unclear/ Not reported	Unclear/ Not reported	Fetal rhesus monkey kidney (FRHK-4); Human lung carcinoma epithelial cells (A549); Verda reno cells (VERO); African rhesus monkey kidney cells (MA104)	ICC RT-PCR	12	2
170	PCR detection of human enteric viruses in bathing areas, waste waters and human stools in Southwestern France.	Schvoerer	2000	Non probabilistic	Monocenter	Prospectively	France	Europe	Western Europe	High-income economies	Jun/1998-Sep/1998	[1986-2000]	Others	Treated water, Untreated wastewater	Unclear/ Not reported	Real-time RT-PCR	Unclear/ Not reported	Unclear/ Not reported	Unclear/ Not reported	Unclear/ Not reported	Unclear/ Not reported	Unclear/ Not reported
171	PCR detection of human enteric viruses in bathing areas, waste waters and human stools in Southwestern France.	Schvoerer	2000	Non probabilistic	Monocenter	Prospectively	France	Europe	Western Europe	High-income economies	Jun/1998-Sep/1998	[1986-2000]	Surface water	Bathing water samples	Unclear/ Not reported	Real-time RT-PCR	Unclear/ Not reported	Unclear/ Not reported	Unclear/ Not reported	Unclear/ Not reported	Unclear/ Not reported	Unclear/ Not reported
172	Quantitative PCR-based identification of enteric viruses contaminating fresh produce and surface water used for irrigation in Egypt.	Shaheen	2019	Non probabilistic	Multicenter	Prospectively	Egypt	Eastern Mediterranean	Northern Africa	Lower-middle income economies	Sep/2017-Dec/2017	[2010-2020]	Surface water	Surface water	Unclear/ Not reported	Real-time RT-PCR	Yes	Unclear/ Not reported	Unclear/ Not reported	Unclear/ Not reported	Unclear/ Not reported	Unclear/ Not reported
173	Foodborne Viruses Detected Sporadically in the Fresh Produce and Its Production Environment in South Korea.	Shin	2019	Non probabilistic	Monocenter	Prospectively	South Korea	Western Pacific	Eastern Asia	High-income economies	Jan/2016-Dec/2017	[2010-2020]	Others	Irrigation water	500	Real-time RT-PCR	Yes	Unclear/ Not reported	Unclear/ Not reported	Unclear/ Not reported	Unclear/ Not reported	Unclear/ Not reported
174	Release of infectious human enteric viruses by full-scale wastewater utilities.	Simmons	2011	Non probabilistic	Multicenter	Prospectively	United States of America	America	Northern America	High-income economies	Jul/2008-Sep/2009	[2000-2010]	Others	Wastewater (influent and effluent)	Unclear/ Not reported	Real-time RT-PCR	Yes	Unclear/ Not reported	Unclear/ Not reported	Unclear/ Not reported	Unclear/ Not reported	Unclear/ Not reported
175	Enteric viruses and adenovirus diversity in waters from 2016 Olympic venues.	Staggemeier	2017	Non probabilistic	Multicenter	Prospectively	Brazil	America	South America	Upper-middle-income economies	Mar/2016-Jul/2016	[2010-2020]	Surface water	Surface water	500	Real-time RT-PCR	Yes	Unclear/ Not reported	Unclear/ Not reported	Unclear/ Not reported	Unclear/ Not reported	Unclear/ Not reported
176	The Detection Rate of Enteric Viruses and Clostridium difficile in a Waste Water Treatment Plant Effluent.	Steyer	2015	Non probabilistic	Monocenter	Prospectively	Slovenia	Europe	Southern Europe	High-income economies	Jan/2012-Dec/2012	[2010-2020]	Treated wastewater	Sewage effluent	5000	Real-time RT-PCR	Yes	Unclear/ Not reported	Unclear/ Not reported	Unclear/ Not reported	Unclear/ Not reported	Unclear/ Not reported
177	Viral, bacterial, and protozoan pathogens and fecal markers in wells supplying groundwater to public water systems in Minnesota, USA.	Stokdyk	2020	Probabilistic	Multicenter	Prospectively	United States of America	America	Northern America	High-income economies	May/2014-May/2016	[2010-2020]	Groundwater	Well water	Unclear/ Not reported	Real-time RT-PCR	Unclear/ Not reported	Unclear/ Not reported	Unclear/ Not reported	Unclear/ Not reported	Unclear/ Not reported	Unclear/ Not reported
178	The occurrence of hepatitis A and astroviruses in selected river and dam waters in South Africa.	Taylor	2001	Non probabilistic	Monocenter	Prospectively	South Africa	Africa	Southern Africa	Upper-middle-income economies	Jun/1997-May/1998	[1986-2000]	Surface water	Surface water	20000-200000	Conventional RT-PCR	Unclear/ Not reported	Unclear/ Not reported	PLC/PRF/5 human liver cells; Fetal rhesus monkey kidney (FRHK-4); Buffalo green monkey kidney cells (BGMK); Primary vervet monkey kidney	ICC RT-PCR	102	31
179	Detection of nineteen enteric viruses in raw sewage in Japan.	Thongprachum	2018	Non probabilistic	Monocenter	Prospectively	Japan	Western Pacific	Eastern Asia	High-income economies	Jul/2015-Jun/2016	[2010-2020]	Untreated wastewater	Raw sewage	100	Conventional RT-PCR	Unclear/ Not reported	Unclear/ Not reported	Unclear/ Not reported	Unclear/ Not reported	Unclear/ Not reported	Unclear/ Not reported
180	Monitoring of human enteric virus and coliphages throughout water reuse system of wastewater treatment plants to irrigation endpoint of leafy greens.	Truchado	2021	Non probabilistic	Monocenter	Prospectively	Spain	Europe	Southern Europe	High-income economies	Unclear/ Not reported	Unclear/ Not reported	Others	Sewage effluent; Sewage influent	200	Real-time RT-PCR	Yes	Unclear/ Not reported	Unclear/ Not reported	Unclear/ Not reported	Unclear/ Not reported	Unclear/ Not reported
181	Environmental hepatitis A detection and awareness on a Native American reservation.	Tucker	2000	Non probabilistic	Monocenter	Prospectively	United States of America	America	Northern America	High-income economies	Unclear/ Not reported	Unclear/ Not reported	Others	Groundwater, Surface water	1000	Conventional RT-PCR	Unclear/ Not reported	Unclear/ Not reported	Unclear/ Not reported	Unclear/ Not reported	Unclear/ Not reported	Unclear/ Not reported
182	Polymerase chain reaction-based prevalence of hepatitis A, hepatitis E and TT viruses in sewage from an endemic area.	Vaidya	2002	Non probabilistic	Monocenter	Prospectively	India	South-East Asia	Southern Asia	Lower-middle income economies	Feb/1999-Jan/2000	[1986-2000]	Treated wastewater	Sewage effluent	Unclear/ Not reported	Conventional RT-PCR	Unclear/ Not reported	Unclear/ Not reported	Unclear/ Not reported	Unclear/ Not reported	Unclear/ Not reported	Unclear/ Not reported
183	Polymerase chain reaction-based prevalence of hepatitis A, hepatitis E and TT viruses in sewage from an endemic area.	Vaidya	2002	Non probabilistic	Monocenter	Prospectively	India	South-East Asia	Southern Asia	Lower-middle income economies	Feb/1999-Jan/2000	[1986-2000]	Untreated wastewater	Sewage influent	Unclear/ Not reported	Conventional RT-PCR	Unclear/ Not reported	8 IB	Unclear/ Not reported	Unclear/ Not reported	Unclear/ Not reported	Unclear/ Not reported
184	Detection of potentially pathogenic enteric viruses in environmental samples from Kenya using the bag-mediated filtration system.	van Zyl	2019	Non probabilistic	Multicenter	Prospectively	Kenya	Africa	Eastern Africa	Lower-middle income economies	Apr/2015-Apr/2016	[2010-2020]	Untreated wastewater	Fecally polluted water samples	2900	Real-time RT-PCR	Yes	Unclear/ Not reported	Unclear/ Not reported	Unclear/ Not reported	Unclear/ Not reported	Unclear/ Not reported
185	Detection of enteroviruses, adenoviruses and Hepatitis A viruses in raw sewage and treated effluents by nested-PCR.	Vantarakis	1999	Non probabilistic	Monocenter	Prospectively	Greece	Europe	Southern Europe	High-income economies	1995-1996	[1986-2000]	Surface water	Surface river water; Pond water	100	Conventional RT-PCR	Yes	Unclear/ Not reported	Unclear/ Not reported	Unclear/ Not reported	Unclear/ Not reported	Unclear/ Not reported
186	Evaluation of microbiological quality of coastal waters in Greece.	Vantarakis	2005	Non probabilistic	Multicenter	Prospectively	Greece	Europe	Southern Europe	High-income economies	May/2000-Aug/2000	[1986-2000]	Surface water	Seawater samples	Unclear/ Not reported	Conventional RT-PCR	Unclear/ Not reported	Unclear/ Not reported	Unclear/ Not reported	Unclear/ Not reported	Unclear/ Not reported	Unclear/ Not reported
187	Hepatitis A virus in surface water in South Africa: what are the risks?	Venter	2007	Non probabilistic	Monocenter	Prospectively	South Africa	Africa	Southern Africa	Upper-middle-income economies	Jun/1997-Jun/2000	[1986-2000]	Surface water	Surface water	Unclear/ Not reported	ICC Conventional RT-PCR	Unclear/ Not reported	Unclear/ Not reported	PLC/PRF/5 human liver cells; Fetal rhesus monkey kidney (FRHK-4)	ICC RT-PCR	308	50
188	Hepatitis e virus-based evaluation of a virion concentration method and detection of enteric viruses in environmental samples by multiplex nested RT-PCR.	Verma	2010	Non probabilistic	Multicenter	Prospectively	India	South-East Asia	Southern Asia	Lower-middle income economies	Unclear/ Not reported	Unclear/ Not reported	Drinking water	Drinking water	Unclear/ Not reported	Real-time RT-PCR	Yes	Unclear/ Not reported	Unclear/ Not reported	Unclear/ Not reported	Unclear/ Not reported	Unclear/ Not reported
189	Hepatitis e virus-based evaluation of a virion concentration method and detection of enteric viruses in environmental samples by multiplex nested RT-PCR.	Verma	2010	Non probabilistic	Multicenter	Prospectively	India	South-East Asia	Southern Asia	Lower-middle income economies	Unclear/ Not reported	Unclear/ Not reported	Surface water	Dam water, River water	Unclear/ Not reported	Real-time RT-PCR	Yes	7 IIIA	Unclear/ Not reported	Unclear/ Not reported	Unclear/ Not reported	Unclear/ Not reported
190	Hepatitis e virus-based evaluation of a virion concentration method and detection of enteric viruses in environmental samples by multiplex nested RT-PCR.	Verma	2010	Non probabilistic	Multicenter	Prospectively	India	South-East Asia	Southern Asia	Lower-middle income economies	Unclear/ Not reported	Unclear/ Not reported	Treated wastewater	Outlet	Unclear/ Not reported	Real-time RT-PCR	Yes	Unclear/ Not reported	Unclear/ Not reported	Unclear/ Not reported	Unclear/ Not reported	Unclear/ Not reported
191	Hepatitis e virus-based evaluation of a virion concentration method and detection of enteric viruses in environmental samples by multiplex nested RT-PCR.	Verma	2010	Non probabilistic	Multicenter	Prospectively	India	South-East Asia	Southern Asia	Lower-middle income economies	Unclear/ Not reported	Unclear/ Not reported	Untreated wastewater	Inlet	Unclear/ Not reported	Real-time RT-PCR	Yes	Unclear/ Not reported	Unclear/ Not reported	Unclear/ Not reported	Unclear/ Not reported	Unclear/ Not reported
192	Molecular detection of hepatitis A virus in urban sewage in Rio de Janeiro, Brazil.	Villar	2007	Non probabilistic	Multicenter	Prospectively	Brazil	America	South America	Upper-middle-income economies	2005	[2000-2010]	Treated wastewater	Treated sewage	2000	Real-time RT-PCR	Unclear/ Not reported	3 IA; 5 IB	Unclear/ Not reported	Unclear/ Not reported	Unclear/ Not reported	Unclear/ Not reported
193	Molecular detection of hepatitis A virus in urban sewage in Rio de Janeiro, Brazil.	Villar	2007	Non probabilistic	Multicenter	Prospectively	Brazil	America	South America	Upper-middle-income economies	2005	[2000-2010]	Untreated wastewater	Raw sewage	2000	Real-time RT-PCR	Unclear/ Not reported	6 IA; 2 IB	Unclear/ Not reported	Unclear/ Not reported	Unclear/ Not reported	Unclear/ Not reported
194	Differential removal of human pathogenic viruses from sewage by conventional and ozone treatments.	Wang	2018	Non probabilistic	Multicenter	Prospectively	Sweden	Europe	Northern Europe	High-income economies	Nov/2015-Dec/2015	[2010-2020]	Others	Sewage effluent; Sewage influent	Unclear/ Not reported	Real-time RT-PCR	Yes	Unclear/ Not reported	Unclear/ Not reported	Unclear/ Not reported	Unclear/ Not reported	Unclear/ Not reported
195	Variations among Viruses in Influent Water and Effluent Water at a Wastewater Plant over One Year as Assessed by Quantitative PCR and Metagenomics.	Wang	2020	Non probabilistic	Multicenter	Prospectively	Sweden	Europe	Northern Europe	High-income economies	Dec/2016-Jan/2018	[2010-2020]	Treated wastewater	Sewage effluent	Unclear/ Not reported	Real-time RT-PCR	Unclear/ Not reported	Unclear/ Not reported	Unclear/ Not reported	Unclear/ Not reported	Unclear/ Not reported	Unclear/ Not reported
196	Variations among Viruses in Influent Water and Effluent Water at a Wastewater Plant over One Year as Assessed by Quantitative PCR and Metagenomics.	Wang	2020	Non probabilistic	Multicenter	Prospectively	Sweden	Europe	Northern Europe	High-income economies	Dec/2016-Jan/2018	[2010-2020]	Untreated wastewater	Sewage influent	1000	Real-time RT-PCR	Unclear/ Not reported	Unclear/ Not reported	Unclear/ Not reported	Unclear/ Not reported	Unclear/ Not reported	Unclear/ Not reported
197	Effects of Weather and Environmental Factors on the Seasonal Prevalence of Foodborne Viruses in Irrigation Waters in Gyeonggi Province, Korea.	Wang	2020	Non probabilistic	Multicenter	Prospectively	South Korea	Western Pacific	Eastern Asia	High-income economies	May/2017-Nov/2018	[2010-2020]	Others	Irrigation water	250	Real-time RT-PCR	Unclear/ Not reported	Unclear/ Not reported	Unclear/ Not reported	Unclear/ Not reported	Unclear/ Not reported	Unclear/ Not reported
198	Detection and characterization of human pathogenic viruses circulating in community wastewater using multi target microarrays and polymerase chain reaction.	Wong	2013	Non probabilistic	Monocenter	Prospectively	United States of America	America	Northern America	High-income economies	Aug/2006-Sept/2007	[2000-2010]	Untreated wastewater	Untreated sewage sample	Unclear/ Not reported	ICC Conventional RT-PCR	Unclear/ Not reported	Unclear/ Not reported	Unclear/ Not reported	Unclear/ Not reported	Unclear/ Not reported	Unclear/ Not reported
199	Evidence of hepatitis A virus circulation in central Argentina: seroprevalence and environmental surveillance.	Yanez	2014	Non probabilistic	Multicenter	Prospectively	Argentina	America	South America	Upper-middle-income economies	2009-2010	[2000-2010]	Surface water	River water	1500	Conventional RT-PCR	Unclear/ Not reported	Unclear/ Not reported	Unclear/ Not reported	Unclear/ Not reported	Unclear/ Not reported	Unclear/ Not reported
200	Evidence of hepatitis A virus circulation in central Argentina: seroprevalence and environmental surveillance.	Yanez	2014	Non probabilistic	Multicenter	Prospectively	Argentina	America	South America	Upper-middle-income economies	2009-2010	[2000-2010]	Untreated wastewater	Raw sewage	1500	Conventional RT-PCR	Unclear/ Not reported	3 IA	Unclear/ Not reported	Unclear/ Not reported	Unclear/ Not reported	Unclear/ Not reported

## Sheet: Réponses au formulaire 1
Horodateur	Extractors	ID	Title	Author	Year (Year of publication)	There is HAV PREVALENCE in Wastewater?	Reason of exclusion	Study Design	Sampling	Sampling method	Number of sites	Rural/Urban	Timing of samples collection	Countries; WHO Region; UNSD Region; Country income level	Study in multiple countries (please give list of countries separated by semicolon)	Study period [Participants recruitment period (Example 1: 2002, Example 2:2002-2004, Example 3: Mar/2002-Jun/2004). If not reported, please write NR.]	Was the study’s target population a close representation of the national population in relation to HAV prevalence?	Was the sampling frame a true or close representation of the target population?	Was some form of random selection used to select the sample, OR was acensus undertaken?	Were data collected directly from the subjects (as opposed to a proxy)?	Was an acceptable inclusion criteria definition used in the study?	Did the author calculate and respect the expected sample size?	Was the HAV detection assay shown to have reliability and validity?	Was the same mode of data collection used for all subjects?	Was the length of the study period > or = 1 year?	Were the numerator(s) and denominator(s) for the HAV prevalence?	Environmental matrices	Starting volume for concentration	Method for concentration	Method for RNA extraction	HAV_detection_method	Concentration data (e.g genome copies /L) if quantitative real time PCR was used	Analyzed region	Total number	Number with HAV	Genotype detected (Please indicate the number of each genotype checked in others and separate with semicolons)	Another key data?	Environmental matrices 1	Starting volume for concentration	Method for concentration	Method for RNA extraction	HAV_detection_method	Concentration data (e.g genome copies /L) if quantitative real time PCR was used	Analyzed region	Total number	Number with HAV	Genotype detected (Please indicate the number of each genotype checked in others and separate with semicolons)	Environmental matrices 2	Starting volume for concentration
2022-04-29 01:40:40	Arnol Bowo Ngandji	1	Disinfection of human enteric viruses in water by copper and silver in combination with low levels of chlorine.	Abad	1994	No	No data on HAV prevalence in water matrices
2022-04-29 01:48:39	Arnol Bowo Ngandji	2	Evaluation of a microbiological water purifier for inactivation of viruses, bacteria and Giardia cysts.	Abbaszadegan	1993	No	No data on HAV prevalence in water matrices
2022-04-29 01:25:26	Arnol Bowo Ngandji	3	A strategy for detection of viruses in groundwater by PCR.	Abbaszadegan	1999	Yes		Cross-sectional	Non probabilistic	Consecutive sampling	Multicenter	Unclear/Not reported	Prospectively	United States of America; America; Northern America; High-income economies		NR	No	Yes	Yes	Not applicable	No	No	Yes	Yes	No	Yes	Groundwater	1.5L	Ultracentrifugation technique	phenol-chloroform	Conventional RT-PCR	10 PFU		150	12		No
2022-04-29 01:28:43	Arnol Bowo Ngandji	4	Combined immunomagnetic separation-molecular beacon-reverse transcription-PCR assay for detection of hepatitis A virus from environmental samples.	Abd El Galil	2004	No	Comment on an article
2022-04-29 01:31:49	Arnol Bowo Ngandji	5	Real-time nucleic acid sequence-based amplification assay for detection of hepatitis A virus.	Abd el-Galil	2005	No	Comment on an article
2022-05-03 02:15:42	Arnol Bowo Ngandji	6	Hepatitis A form unsafe water.	Abdullah	1997	No	Full text or abstract not found
2022-04-29 00:20:17	Arnol Bowo Ngandji	7	A soccer championship and hepatitis A outbreak.	Abraira	2000	No	No data on HAV prevalence in water matrices
2022-05-03 00:03:25	Arnol Bowo Ngandji	8	Quantitative PCR Detection and Characterisation of Human Adenovirus, Rotavirus and Hepatitis A Virus in Discharged Effluents of Two Wastewater Treatment Facilities in the Eastern Cape, South Africa.	Adefisoye	2016	Yes		Cross-sectional	Non probabilistic	Consecutive sampling	Multicenter	Urban	Prospectively	South Africa; Africa; Southern Africa; Upper-middle-income economies		Sep/2012-Aug/2013	No	Yes	Yes	Not applicable	No	No	Yes	Not applicable	No	Yes	Wastewater sample	1.7 L	Filtration	Quick-gDNA Mini_x0002_Prep; Zymo Research	Real-time RT-PCR	1 genome copies/L		48	3		No
2022-05-02 22:34:52	Arnol Bowo Ngandji	9	Assessment of the risk for human health of enterovirus and hepatitis a virus in clinical and water sources from three metropolitan cities of Pakistan.	Ahmad	2018	Yes		Cross-sectional	Non probabilistic	Consecutive sampling	Multicenter	Urban	Prospectively	Pakistan; Eastern Mediterranean; Southern Asia; Lower-middle income economies		Jun/2016 – Jun/2017	No	Yes	Yes	Not applicable	No	No	Yes	Not applicable	Yes	Yes	Drinking water	2L	negatively charged membrane filters	(QIAmpUltrasens virus kit, Qiagen, USA; Nucleospin total RNA/DNA extraction kit, Invitrogen, UK; virus DNA/RNA extraction kit, Genead, UK	Conventional RT-PCR			44	1		Yes	River water		negatively charged membrane filters	(QIAmpUltrasens virus kit, Qiagen, USA; Nucleospin total RNA/DNA extraction kit, Invitrogen, UK; virus DNA/RNA extraction kit, Genead, UK	Conventional RT-PCR			26	5
2022-04-29 01:11:19	Arnol Bowo Ngandji	10	Frequency of hepatitis E and Hepatitis A virus in water sample collected from Faisalabad, Pakistan.	Ahmad	2015	Yes		Cross-sectional	Non probabilistic	Consecutive sampling	Multicenter	Rural	Prospectively	Pakistan; Eastern Mediterranean; Southern Asia; Lower-middle income economies		2013	No	Yes	No	Not applicable	No	No	Yes	Yes	No	Yes	Sewage sample	1L	DNA concentrator	QIAamp Viral RNA mini kit	Conventional RT-PCR			20	2		No
2022-05-02 22:16:14	Arnol Bowo Ngandji	12	Prevalence of rotavirus, adenovirus, hepatitis A virus and enterovirus in water samples collected from different region of Peshawar, Pakistan.	Ahmad	2016	Yes		Cross-sectional	Non probabilistic	Consecutive sampling	Monocenter	Urban	Prospectively	Pakistan; Eastern Mediterranean; Southern Asia; Lower-middle income economies		Jun/2014 – May/2015	No	Yes	Yes	Not applicable	No	No	Yes	Not applicable	Yes	Yes	Drinking water, Sewage sample	1L	adsorption elution method	RNA/DNA extraction kit (Invitrogen, USA)	Conventional RT-PCR			95	12		No
2022-04-29 00:57:13	Arnol Bowo Ngandji	14	Prevalence of Waterborne Diseases in Bade, Nguru and Machina Local Government Areas of Yobe State-Nigeria.	Ahmed	2020	No	No data on HAV prevalence in water matrices
2022-05-03 02:34:08	Arnol Bowo Ngandji	15	Estimation of hepatitis a virus infection prevalence through drinking water supply of primary schools of Sindh, Pakistan.	Ahmed	2020	No	No data on HAV prevalence in water matrices
2022-05-02 21:00:46	Arnol Bowo Ngandji	16	Comparative analysis of rapid concentration methods for the recovery of SARS-CoV-2 and quantification of human enteric viruses and a sewage-associated marker gene in untreated wastewater.	Ahmed	2021	No	No data on HAV prevalence in water matrices
2022-05-03 02:18:53	Arnol Bowo Ngandji	17	Ultraviolet, chlorine and ozone disinfection of some enteroviruses in drinking water and treated effluents.	Ali.	1997	No	Full text or abstract not found
2022-05-03 01:22:20	Arnol Bowo Ngandji	18	Detection of enteric viruses, Giardia and Cryptosporidium in two different types of drinking water treatment facilities.	Ali	2004	No	No data on HAV prevalence in water matrices
2022-05-03 02:35:57	Arnol Bowo Ngandji	19	New approaches to virus removal: the way to produce virus-free drinking water.	Ali	1997	No	Full text or abstract not found
2022-05-02 20:54:54	Arnol Bowo Ngandji	20	Occurrence of various viruses and recent evidence of SARS-CoV-2 in wastewater systems.	Ali	2021	No	Review
2022-05-03 01:29:01	Arnol Bowo Ngandji	21	The epidemiology of hepatitis A in Rio de Janeiro: Environmental and domestic risk factors.	Almeida	2001	No	No data on HAV prevalence in water matrices
2022-05-03 00:45:51	Arnol Bowo Ngandji	22	Microbiological quality of reclaimed water used for golf courses' irrigation.	Alonso	2006	No	No data on HAV prevalence in water matrices
2022-05-03 02:24:05	Arnol Bowo Ngandji	23	Evaluation of an extraction-precipitation method for recovering hepatitis a virus and poliovirus from hardshell clams (Mercenaria mercenaria).	Alouini	1995	No	No data on HAV prevalence in water matrices
2022-05-02 21:58:09	Arnol Bowo Ngandji	24	A large hepatitis a outbreak in Rio de Janeiro reinforces the need for vaccination of risk groups.	Amado	2018	No	Sample size < or = 10 participants
2022-05-02 21:47:28	Arnol Bowo Ngandji	25	Exposure to multiple subgenotypes of hepatitis A virus during an outbreak using matched serum and saliva specimens.	Amado	2011	No	No data on HAV prevalence in water matrices
2022-05-03 02:39:13	Arnol Bowo Ngandji	27	Food-borne viruses and food safety considerations.	Ambrozic	2009	No	No data on HAV prevalence in water matrices
		626	Comparison of two virus concentration methods for enteric viruses detection in Moroccan wastewater and treated effluent.	Amdiouni	2017	Yes
2022-04-29 01:35:56	Arnol Bowo Ngandji	29	Enteric Viruses and Pepper Mild Mottle Virus Show Significant Correlation in Select Mid-Atlantic Agricultural Waters.	Anderson-Coughlin	2021	No	No data on HAV prevalence in water matrices
2022-05-02 21:56:55	Arnol Bowo Ngandji	30	Recovery and Detection of Enteric Viruses from Non-Traditional Irrigation Water Sources.	Anderson-Coughlin	2019	No	No data on HAV prevalence in water matrices
2022-05-03 02:45:06	Arnol Bowo Ngandji	28	Virus removal in conventional wastewater treatment process.	Anastasi	2008	Yes		Cross-sectional	Non probabilistic	Consecutive sampling	Unclear/ Not reported	Urban	Prospectively	Italy; Europe; Southern Europe; High-income economies		NR	No	Yes	Yes	Not applicable	No	No	Yes	Not applicable	No	Yes	Wastewater sample		Ultracentrifugation technique		Conventional RT-PCR			92	21		No
2022-05-03 02:47:10	Arnol Bowo Ngandji	32	Persistence of infectious hepatitis A virus and its genome in artificial seawater.	Arnal	1998	No	Full text or abstract not found
2022-04-29 01:58:39	Arnol Bowo Ngandji	33	Waterborne pathogens in urban watersheds.	Arnone	2007	No	No data on HAV prevalence in water matrices
2022-05-03 01:09:42	Arnol Bowo Ngandji	34	Water borne hepatitis A and hepatitis E in Malwa Region of Punjab, India.	Arora	2013	No	No data on HAV prevalence in water matrices
2022-05-03 00:28:24	Arnol Bowo Ngandji	35	An epidemiological study of enteric viruses in sewage with molecular characterization by RT-PCR and sequence analysis.	Arraj	2008	No	No data on HAV prevalence in water matrices
2022-04-29 01:53:01	Arnol Bowo Ngandji	36	Comparison of bacteriophage and enteric virus removal in pilot scale activated sludge plants.	Arraj	2005	No	No data on HAV prevalence in water matrices
2022-04-29 01:43:52	Arnol Bowo Ngandji	37	Epidemiological evidence for vaccinating wastewater treatment plant workers against hepatitis A and hepatitis B virus.	Arvanitidou	2004	No	No data on HAV prevalence in water matrices
2022-04-29 02:01:51	Arnol Bowo Ngandji	38	Microbial contamination of drinking water and disease outcomes in developing regions.	Ashbolt	2004	No	No data on HAV prevalence in water matrices
2022-04-29 00:52:54	Arnol Bowo Ngandji	31	Molecular characteristics of hepatitis A virus from a large outbreak from Kerala, India.	Arankalle	2006	Yes		Community outbreak	Non probabilistic	Consecutive sampling	Multicenter	Rural	Prospectively	India; South-East Asia; Southern Asia; Lower-middle income economies		2005	No	Yes	Yes	Not applicable	Unclear	No	Yes	Yes	No	Yes	Water samples	20l	membrane-based ultrafiltration technology	TRIzOL reagent	Real-time RT-PCR	100 copies	5’NCR region	13	0		No
2022-05-02 20:41:56	Arnol Bowo Ngandji	39	Prevalence and genetic diversity of waterborne pathogenic viruses in surface waters of tropical urban catchments.	Aw	2011	Yes		Cross-sectional	Non probabilistic	Consecutive sampling	Multicenter	Urban	Prospectively	Singapore; Western Pacific; Southeastern Asia; High-income economies		Jun/2006-Jan/2009	No	Yes	Yes	Not applicable	No	No	Yes	Not applicable	Yes	Yes	Surface water	200–300 ml	Ultracentrifugation technique	QIAamp Viral RNA mini kit	Real-time RT-PCR	500 µl.		45	4		No
2022-04-29 00:18:18	Arnol Bowo Ngandji	42	Management of source and drinking-water quality in Pakistan.	Aziz	2005	No	Review
2022-05-02 19:48:07	Arnol Bowo Ngandji	40	Environmental surveillance and molecular characterization of human enteric viruses in tropical urban wastewaters.	Aw	2010	Yes		Cross-sectional	Non probabilistic	Consecutive sampling	Monocenter	Urban	Prospectively	Singapore; Western Pacific; Southeastern Asia; High-income economies		2007	No	Yes	Yes	Not applicable	No	No	Yes	Not applicable	Yes	Yes	Sewage sample	1l	Ultracentrifugation technique	QIAamp Viral RNA mini kit	Real-time RT-PCR	140 µl		18	14		Yes	secondary effluent samples	10 l	Ultracentrifugation technique	QIAamp Viral RNA mini kit	Real-time RT-PCR	140µl		18	5
2022-04-29 01:46:37	Arnol Bowo Ngandji	44	Evidence of the circulation of hepatitis A virus, subgenotype IA, in environmental samples from Antioquia, Colombia.	Báez	2016	No	Article not in English or in French
2022-05-03 00:31:47	Arnol Bowo Ngandji	45	Human viruses in water, wastewater and soil.	Bagdasarjan	1979	No	Review
2022-05-02 22:57:08	Arnol Bowo Ngandji	46	Persistence of viral pathogens and bacteriophages during sewage treatment: lack of correlation with indicator bacteria.	Baggi	2001	No	No data on HAV prevalence in water matrices
2022-05-10 08:33:25	Sebastien Kenmoe	43	Development of diagnostic systems for wide range and highly sensitive detection of two waterborne hepatitis viruses from groundwater using the conventional reverse transcription nested PCR assay.	Bae	2022	Yes		Cross-sectional	Non probabilistic	Consecutive sampling	Monocenter	Unclear/Not reported	Prospectively	South Korea; Western Pacific; Eastern Asia; High-income economies		nr	No	Yes	No	Not applicable	Yes	No	Yes	Yes	Unclear	Yes	Groundwater			QIAamp Viral RNA mini kit	Conventional RT-PCR			20	0		No
2022-05-02 23:35:58	Arnol Bowo Ngandji	47	Occurrence of four waterborne viruses at five typical raw water resources in the Republic of Korea during August 2013 to February 2019.	Bahk	2020	Yes		Cross-sectional	Non probabilistic	Consecutive sampling	Multicenter	Urban	Prospectively	South Korea; Western Pacific; Eastern Asia; High-income economies		Aug/2013- Feb/2019	No	Yes	Yes	Not applicable	No	No	Yes	Not applicable	Yes	Yes	Water samples		Filtration	QIAamp Viral RNA mini kit	Conventional RT-PCR			100	4		No
2022-04-26 20:00:06	Donatien Serge Mbaga	49	Enhancing quantitative-PCR-based detection of pathogenic enteric viruses in coastal marine environment using monolithic chromatographic supports.	Balasubramanian	2016	No	No data on HAV prevalence in water matrices
2022-04-26 20:03:59	Donatien Serge Mbaga	50	Epidemiological and molecular investigation of a hepatitis A outbreak in Tamil Nadu, Southern India.	Barathidasan	2020	No	No data on HAV prevalence in water matrices
2022-05-03 01:04:49	Arnol Bowo Ngandji	48	Detection of subgenotype IA and IIIA hepatitis A viruses in rivers flowing through metro Manila, the Philippines.	Bai	2019	Yes		Cross-sectional	Non probabilistic	Consecutive sampling	Multicenter	Urban	Prospectively	Philippines; Western Pacific; Southeastern Asia; Lower-middle income economies		Dec/2012-July/2013	No	Yes	Yes	Not applicable	No	No	Yes	Not applicable	No	Yes	Water samples			MagNA Pure LC Total Nucleic Acid isolation k	Conventional RT-PCR			12	7	Genotype I, Genotype III	No
2022-04-26 20:31:30	Donatien Serge Mbaga	53	Impact of Public Health Interventions on Drinking Water-Associated Outbreaks of Hepatitis A - United States, 1971-2017.	Barrett	2019	No	Review
2022-04-25 21:59:02	Donatien Serge Mbaga	54	An outbreak of hepatitis A associated with treated waste water used for irrigation.	Barrimah	1999	No	No data on HAV prevalence in water matrices
2022-04-26 20:44:56	Donatien Serge Mbaga	55	An epidemiologic study of the relationship between hepatitis A and water supply characteristics and treatment.	Batik	1980	No	No data on HAV prevalence in water matrices
2022-04-26 20:48:10	Donatien Serge Mbaga	56	Preliminary Study on Norovirus, Hepatitis A Virus, Escherichia coli and their Potential Seasonality in Shellfish from Different Growing and Harvesting Areas in Sardinia Region.	Bazzardi	2014	No	No data on HAV prevalence in water matrices
2022-04-26 20:23:24	Donatien Serge Mbaga	51	Longitudinal study on occurrence of adenoviruses and hepatitis A virus in raw domestic sewage in the city of Limeira, SÃo Paulo.	Barrella	2009	Yes		Cross-sectional	Non probabilistic	Consecutive sampling	Monocenter	Urban	Prospectively	Brazil; America; South America; Upper-middle-income economies		Dec/2004-Dec/2005.	No	Yes	No	Yes	Yes	No	Yes	Yes	Yes	Yes	Sewage sample		Filtration	TRIzOL reagent	Conventional RT-PCR		VP3, VP1	50	24		No
2022-04-26 21:43:55	Donatien Serge Mbaga	58	Epidemic non-A, non-B viral hepatitis in Algeria: Strong evidence for its spreading by water.	Belabbes	1985	No	No data on HAV prevalence in water matrices
2022-04-26 21:55:35	Donatien Serge Mbaga	59	Norovirus and Other Human Enteric Viruses in Moroccan Shellfish.	Benabbes	2013	No	No data on HAV prevalence in water matrices
2022-04-25 22:10:12	Donatien Serge Mbaga	60	[Diagnosis and clinical features of infection with hepatitis A and hepatitis E viruses. Transmission through drinking water and foodstuffs].	Benckert	2001	No	Article not in English or in French
2022-04-25 22:19:32	Donatien Serge Mbaga	62	Indicators of viruses in water and food.	Berg	1978	No	Review
2022-04-25 22:26:36	Donatien Serge Mbaga	63	A waterborne outbreak of hepatitis A in Meade County, Kentucky.	Bergeisen	1985	No	No data on HAV prevalence in water matrices
2022-04-26 22:04:00	Donatien Serge Mbaga	64	Molecular characterization of sewage-borne pathogens and detection of sewage markers in an urban stream in Caracas, Venezuela.	Betancourt	2010	No	No data on HAV prevalence in water matrices
2022-04-26 22:08:49	Donatien Serge Mbaga	65	Occurrence of Norovirus and Hepatitis A Virus in Wild Mussels Collected from the Baltic Sea.	Bigoraj	2014	No	No data on HAV prevalence in water matrices
2022-04-26 21:41:26	Donatien Serge Mbaga	57	Qualitative and Quantitative Assessment of Hepatitis A Virus in Wastewaters in Tunisia.	Béji-Hamza	2014	Yes		Cross-sectional	Non probabilistic	Consecutive sampling	Multicenter	Urban	Prospectively	Tunisia; Eastern Mediterranean; Northern Africa; Lower-middle income economies		2007-2008	No	Yes	No	Yes	Yes	No	Yes	Yes	Yes	Yes	Raw sewage			NucliSENS easyMAG	Real-time RT-PCR		VP1, 2A	79	54	Genotype I	Yes	Treated sewage			NucliSENS easyMAG	Real-time RT-PCR		VP1, 2A	71	46	Genotype I
2022-04-26 22:48:37	Donatien Serge Mbaga	67	Long-term survival of hepatitis A virus and poliovirus type 1 in mineral water.	Biziagos	1988	No	No data on HAV prevalence in water matrices
2022-04-28 06:58:34	Donatien Serge Mbaga	68	Hepatitis A virus concentration from experimentally contaminated distilled, tap, waste and seawater.	Biziagos	1989	No	No data on HAV prevalence in water matrices
2022-04-28 07:01:13	Donatien Serge Mbaga	69	Duplex real-time qRT-PCR for the detection of hepatitis A virus in water and raspberries using the MS2 bacteriophage as a process control.	Blaise-Boisseau	2010	No	No data on HAV prevalence in water matrices
2022-04-26 22:46:19	Donatien Serge Mbaga	66	Monitoring human enteric viruses in wastewater and relevance to infections encountered in the clinical setting: A one-year experiment in central France, 2014 to 2015.	Bisseux	2018	Yes		Cross-sectional	Non probabilistic	Consecutive sampling	Monocenter	Rural	Prospectively	France; Europe; Western Europe; High-income economies		Oct/2014– Oct/2015	No	Yes	No	Yes	Yes	No	Yes	Yes	Yes	Yes	Raw sewage	60mL	Tangential ﬂow ultraﬁltration technique	NucliSENS easyMAG	Real-time RT-PCR		VP1, 2A	57	16	Genotype I	Yes	Treated sewage	16.5 mL	Tangential ﬂow ultraﬁltration technique	NucliSENS easyMAG	Real-time RT-PCR		VP1, 2A	26	6	Genotype I, Genotype III
2022-04-28 07:45:46	Donatien Serge Mbaga	71	Recovery of hepatitis A virus from a water supply responsible for a common source outbreak of hepatitis A.	Bloch	1990	No	No data on HAV prevalence in water matrices
2022-04-25 22:46:44	Donatien Serge Mbaga	72	Improvement of the method of gathering of hepatitis A viruses and its evaluation by water analysis.	Blokhin	1992	No	Article not in English or in French
2022-04-28 07:40:01	Donatien Serge Mbaga	70	Glass Wool Concentration Optimization for the Detection of Enveloped and Non-enveloped Waterborne Viruses.	Blanco	2019	Yes		Cross-sectional	Non probabilistic	Consecutive sampling	Multicenter	Urban	Prospectively	Saudi Arabia; Eastern Mediterranean; Western Asia; High-income economies		Sep/2015-Nov/2015	No	Yes	No	Yes	Not applicable	Not applicable	Yes	Yes	No	Yes	Water samples	5-L	Polyethylene glycol precipitation	NucliSens miniMAG	Real-time RT-PCR			21	8		No
2022-04-28 08:16:33	Donatien Serge Mbaga	73	Incidence of enteric viruses in groundwater from household wells in Wisconsin.	Borchardt	2003	Yes		Cross-sectional	Probabilistic	Stratified sampling	Multicenter	Urban	Prospectively	United States of America; America; Northern America; High-income economies		Jan/1999-Jun/2000	No	Yes	Yes	Yes	Yes	No	Yes	Yes	Yes	Yes	Well water	1,500-liter	Filtration, MDS cartridge filter	Guanidinium isothiocyanate	Conventional RT-PCR			50	3		No
2022-05-02 07:42:06	Donatien Serge Mbaga	75	Improved Detection of Norovirus and Hepatitis A Virus in Surface Water by Applying Pre-PCR Processing.	Borgmästars	2017	No	Sample size < or = 10 participants
2022-05-02 07:46:39	Donatien Serge Mbaga	76	Comparison of Skimmed Milk and Lanthanum Flocculation for Concentration of Pathogenic Viruses in Water.	Borgmästars	2021	No	Sample size < or = 10 participants
2022-05-02 07:53:47	Donatien Serge Mbaga	77	Disinfection of human enteric viruses in water by copper: Silver and reduced levels of chlorine.	Bosch	1993	No	No data on HAV prevalence in water matrices
2022-05-02 08:01:31	Donatien Serge Mbaga	78	Concentration of hepatitis A virus in environmental samples.	Bosch	1991	No	Not possible to extract data on HAV prevalence
2022-05-02 08:05:53	Donatien Serge Mbaga	79	New tools for the study and direct surveillance of viral pathogens in water.	Bosch	2008	No	Review
2022-05-02 08:11:58	Donatien Serge Mbaga	80	Human enteric viruses in Coquina clams associated with a large hepatitis A outbreak.	Bosch	2001	No	No data on HAV prevalence in water matrices
2022-05-02 08:18:35	Donatien Serge Mbaga	81	Hepatitis A associated with a hardware store water fountain and a contaminated well in Lancaster County, Pennsylvania, 1980.	Bowen	1983	No	No data on HAV prevalence in water matrices
2022-05-02 08:22:44	Donatien Serge Mbaga	82	International linkage of two food-borne hepatitis a clusters through traceback of mussels, The Netherlands, 2012.	Boxman	2016	No	No data on HAV prevalence in water matrices
2022-04-25 23:06:01	Donatien Serge Mbaga	83	Environmental risk factors for hepatitis a.	Bozaykut	2012	No	No data on HAV prevalence in water matrices
2022-04-25 23:07:55	Donatien Serge Mbaga	84	[Estimation of risk areas for hepatitis A].	Braga	2008	No	Article not in English or in French
2022-05-02 08:32:38	Donatien Serge Mbaga	85	Spatial and Temporal Distribution of Norovirus and E. coli in Sydney Rock Oysters Following a Sewage Overflow into an Estuary.	Brake	2018	No	No data on HAV prevalence in water matrices
2022-05-02 08:35:57	Donatien Serge Mbaga	86	Simultaneous recovery of bacteria and viruses from contaminated water and spinach by a filtration method.	Brassard	2011	No	No data on HAV prevalence in water matrices
2022-05-02 08:46:27	Donatien Serge Mbaga	87	Concentration and detection of hepatitis A virus and rotavirus in spring water samples by reverse transcription-PCR.	Brassard	2005	No	No data on HAV prevalence in water matrices
2022-05-02 08:53:21	Donatien Serge Mbaga	88	Human viral pathogens are pervasive in wastewater treatment center aerosols.	Brisebois	2018	No	No data on HAV prevalence in water matrices
2022-05-02 09:03:01	Donatien Serge Mbaga	89	Detection and quantification of hepatitis A virus in seawater via real-time RT-PCR.	Brooks	2005	No	No data on HAV prevalence in water matrices
2022-05-02 09:05:32	Donatien Serge Mbaga	90	Investigations of the epidemiology of infections with hepatitis A virus in Jamaica.	Brown	2000	No	No data on HAV prevalence in water matrices
2022-05-02 09:27:39	Donatien Serge Mbaga	91	Surveillance for waterborne disease outbreaks associated with drinking water - united states, 2007-2008.	Brunkard	2011	No	No data on HAV prevalence in water matrices
2022-05-02 09:41:43	Donatien Serge Mbaga	92	An outbreak of hepatitis A associated with recreational lake water.	Bryan	1974	No	No data on HAV prevalence in water matrices
2022-04-25 23:21:21	Donatien Serge Mbaga	93	Hepatitis A, a day care home, and a contaminated well.	Buehler	1984	No	Full text or abstract not found
2022-05-02 09:47:12	Donatien Serge Mbaga	94	Attachment of enteric viruses to bottles.	Butot	2004	No	No data on HAV prevalence in water matrices
2022-04-25 23:23:32	Donatien Serge Mbaga	95	Infectious diseases related to water in Peru.	Cabezas Sánchez	2018	No	Article not in English or in French
2022-05-02 10:03:42	Donatien Serge Mbaga	96	Enteric viruses in lentic and lotic freshwater habitats from Brazil's Midwest and South regions in the Guarani Aquifer area.	Cadamuro	2021	No	Not possible to extract data on HAV prevalence
2022-05-03 02:54:42	Elisabeth Zeuko'o	97	Comparative survival of hepatitis a virus, poliovirus and indicator viruses in geographically diverse seawaters.	Callahan	1995	No	No data on HAV prevalence in water matrices
2022-05-03 03:11:30	Elisabeth Zeuko'o	98	Detection of human enteric viruses in shellfish, vegetables, waters and environmental samples: A preliminary study.	Cannella	2010	No	Not possible to extract data on HAV prevalence	Cross-sectional	Probabilistic	Simple random sampling	Multicenter	Urban	Prospectively	Italy; Europe; Southern Europe; High-income economies	no	Jan/2008 - Oct/ 2009	No	No	Yes	Yes	Yes	No	Yes	Yes	Yes	Yes	Unclear/ Not reported				Real-time RT-PCR			270	1		No
2022-05-02 07:36:00	Donatien Serge Mbaga	74	Vulnerability of drinking-water wells in La Crosse, Wisconsin, to enteric-virus contamination from surface water contributions.	Borchardt	2004	Yes		Cross-sectional	Non probabilistic	Consecutive sampling	Multicenter	Urban	Prospectively	United States of America; America; Northern America; High-income economies		Mar/2001-Feb/2002	No	Yes	No	Yes	Yes	No	Yes	Yes	Yes	Yes	Drinking water	1,500 liters	Filtration	Guanidinium isothiocyanate	Conventional RT-PCR			48	4		Yes	Surface water	1,500 liters	Filtration	Guanidinium isothiocyanate	Conventional RT-PCR			12	0
2022-05-05 07:40:43	Elisabeth Zeuko'o	99	Viral removal by wastewater treatment: Monitoring of indicators and pathogens.	Carducci	2009	Yes		Cross-sectional	Probabilistic	Simple random sampling	Monocenter	Urban	Prospectively	Italy; Europe; Southern Europe; High-income economies	No	Mar/2007-Apr/2008	No	No	Yes	Yes	Yes	No	Yes	Yes	Yes	Yes	Raw sewage, Wastewater sample	40 ml	Filtration	QIAamp Viral RNA mini kit	Conventional RT-PCR, Real-time RT-PCR	6.25 x 105 genome copies/ml		58	0		No
2022-05-05 09:28:37	Elisabeth Zeuko'o	100	Virological control of groundwater quality using biomolecular tests.	Carducci	2003	Yes		Cross-sectional	Probabilistic	Simple random sampling	Monocenter	Urban	Prospectively	Italy; Europe; Southern Europe; High-income economies	No	NR	No	No	Yes	Yes	Yes	No	Yes	Yes	Unclear	Yes	Groundwater	100L	Filtration	QIAamp Viral RNA mini kit	Conventional RT-PCR, Culture, Real-time RT-PCR			35	0		No
2022-05-05 09:47:21	Elisabeth Zeuko'o	101	Study of the viral removal efficiency in a urban wastewater treatment plant.	Carducci	2008	Yes		Cross-sectional	Probabilistic	Simple random sampling	Monocenter	Urban	Prospectively	Italy; Europe; Southern Europe; High-income economies	No	Apr/2007-Jun/2007	No	No	Yes	Yes	Yes	No	Yes	Yes	No	Yes	Groundwater, Wastewater sample	1Litre	Tangential ﬂow ultraﬁltration technique	QIAamp Viral RNA mini kit	Conventional RT-PCR, Real-time RT-PCR	2.4 x103 genomic copies/ml		40	2		No
2022-05-05 14:26:02	Elisabeth Zeuko'o	104	Detection of enteroviruses, hepatitis a virus and rotaviruses in sewage by means of an immunomagnetic capture reverse transcription-PCR assay.	Casas	2002	No	Sample size < or = 10 participants	Cross-sectional	Probabilistic	Simple random sampling	Monocenter	Urban	Prospectively	Spain; Europe; Southern Europe; High-income economies	no	Nov/1999 - Sept/ 2000	No	No	No	Yes	Yes	No	Yes	Yes	No	Yes	Raw sewage, Sewage sample, Wastewater sample	1litre	Polyethylene glycol precipitation	PurescriptTM kit	Conventional RT-PCR, Real-time RT-PCR			8	8		No
2022-05-05 14:39:14	Elisabeth Zeuko'o	105	Human viruses in the costal environment of a Croatian harbour.	Cecuk	1993	No	Full text or abstract not found	Cross-sectional	Probabilistic	Simple random sampling	Monocenter	Urban	Prospectively	Croatia; Europe; Southern Europe; High-income economies	No	NR	No	No	Yes	Yes	Yes	No	Yes	Yes	Unclear	Unclear	Seawater								76.3		No
2022-05-05 15:04:42	Elisabeth Zeuko'o	106	Household-based biodigesters promote reduction of enteric virus and bacteria in vulnerable and poverty rural area.	Célia da Silva Lanna	2019	No	No data on HAV prevalence in water matrices	Cross-sectional	Probabilistic	Simple random sampling	Monocenter	Rural	Prospectively	Brazil; America; South America; Upper-middle-income economies	No	NR	No	Yes	Yes	Yes	Yes	No	Yes	Yes	Unclear	No	River water, Wastewater sample	200 mL	Polyethylene glycol precipitation	QIAamp Viral RNA mini kit	Conventional RT-PCR, Real-time RT-PCR						No
2022-05-05 10:15:35	Elisabeth Zeuko'o	102	Epidemiological surveillance of human enteric viruses by monitoring of different environmental matrices.	Carducci	2006	Yes		Cross-sectional	Probabilistic	Simple random sampling	Monocenter	Urban	Prospectively	Italy; Europe; Southern Europe; High-income economies	No	May/2004-Mar/2005	No	No	Yes	Yes	Yes	No	Yes	Yes	No	Yes	Groundwater, Raw sewage, River water, Sewage sample, Wastewater sample		Tangential ﬂow ultraﬁltration technique	QIAamp Viral RNA mini kit	Conventional RT-PCR, Real-time RT-PCR	10litres	2A1, 2A2, 2A3, 2B	255	0	Genotype I, Genotype II	No
2022-05-08 01:53:58	Elisabeth Zeuko'o	107	A Somatic Coliphage Threshold Approach To Improve the Management of Activated Sludge Wastewater Treatment Plant Effluents in Resource-Limited Regions.	Chacón	2020	Yes		Cross-sectional	Probabilistic	Simple random sampling	Multicenter	Urban	Prospectively	Costa Rica; America; Central America; Upper-middle-income economies	no	Mar/2013-Dec/2013	No	No	Yes	Yes	Yes	No	Yes	Yes	No	Yes	Wastewater sample	1.5l	Polyethylene glycol precipitation	NucleoSpin RNA virus kit	Culture, Real-time RT-PCR		VP1	119	8		No
2022-05-08 02:02:38	Elisabeth Zeuko'o	109	Non-A non-B viral hepatitis: A common-source outbreak traced to sewage contamination of drinking water.	Chakraborty	1982	No	Full text or abstract not found
2022-05-08 02:06:55	Elisabeth Zeuko'o	110	Detection of hepatitis A virus in environmental samples by coupled reverse transcription and polymerase chain reaction.	Chang	1997	No	No data on HAV prevalence in water matrices
2022-05-08 02:17:25	Elisabeth Zeuko'o	111	[A hepatitis A outbreak caused by contaminated well water in a primary school of Jiangxi province, China, 2009].	Chen	2011	No	Article not in English or in French	Community outbreak, Cross-sectional	Probabilistic	Multistage sampling, Simple random sampling	Monocenter	Rural	Retroprospectively	China; Western Pacific; Eastern Asia; Upper-middle-income economies	no	Nov/2008-Feb/2009	No	No	Yes	Yes	Yes	No	Yes	Yes	No	Yes	Bore well water							19	1		No
2022-05-08 02:21:07	Elisabeth Zeuko'o	112	Investigating emerging microbiological risks in local river water used by water treatment plants in the Paris metropolitan area.	Chesnot	2012	No	No data on HAV prevalence in water matrices
2022-05-08 02:00:06	Sebastien Kenmoe	108	Wastewater-based epidemiology of enteric viruses and surveillance of acute gastrointestinal illness outbreaks in a resource-limited region.	Chacón	2021	Yes		cross sectional	Non probabilistic	Consecutive sampling	Multicenter	Unclear/Not reported	Prospectively	Costa Rica; America; Central America; Upper-middle-income economies		2013	no	yes	no	not applicable	yes	no	yes	yes	no	no	influent (raw, untreated sewage)	1000 mL	Polyethylene glycol precipitation	NucleoSpin RNA virus kit	Conventional RT-PCR		VP1	59	5
2022-05-08 02:45:52	Elisabeth Zeuko'o	114	Assessment of the Risks for Human Health of Adenoviruses, Hepatitis A Virus, Rotaviruses and Enteroviruses in the Buffalo River and Three Source Water Dams in the Eastern Cape.	Chigor	2014	No	No data on HAV prevalence in water matrices
2022-05-08 02:54:11	Elisabeth Zeuko'o	116	A water-borne hepatitis epidemic.	Christiansen	1957	No	Full text or abstract not found
2022-05-08 02:56:58	Elisabeth Zeuko'o	117	Comparative survival of indicator viruses and enteric viruses in seawater and sediment.	Chung	1993	No	No data on HAV prevalence in water matrices
2022-05-08 02:42:27	Elisabeth Zeuko'o	113	Quantitative RT-PCR detection of hepatitis A virus, rotaviruses and enteroviruses in the Buffalo River and source water dams in the Eastern Cape Province of South Africa.	Chigor	2012	Yes		Cross-sectional	Probabilistic	Multistage sampling	Multicenter	Urban/Rural	Prospectively	South Africa; Africa; Southern Africa; Upper-middle-income economies	no	Aug/2010-July/2011	No	No	Yes	Yes	Yes	No	Yes	Yes	No	Yes	River water	8ml	Filtration, Ultracentrifugation technique	Quick-RNATM MiniPrep	Conventional RT-PCR, Real-time RT-PCR	1.5 × 101 –1.9 × 105 genome copies/L	5′ NCR	72	31		No
2022-05-08 03:06:12	Elisabeth Zeuko'o	119	An environmental health survey of drinking water contamination by leachate from a pesticide waste dump in Hardeman County, Tennessee.	Clark	1982	No	No data on HAV prevalence in water matrices
2022-05-08 03:08:24	Elisabeth Zeuko'o	120	Viruses occurring in water.	Clarke	1970	No	Full text or abstract not found
2022-05-08 03:10:06	Elisabeth Zeuko'o	121	HUMAN ENTERIC VIRUSES IN SEWAGE.	Clarke	1964	No	Full text or abstract not found
2022-05-08 03:11:35	Elisabeth Zeuko'o	122	Vehicular transmission of hepatitis A.	Cliver	1985	No	Full text or abstract not found
2022-05-08 03:13:56	Elisabeth Zeuko'o	123	Early days of food and environmental virology.	Cliver	2010	No	Review
2022-05-08 03:18:34	Elisabeth Zeuko'o	124	Hepatitis A virus detection in oysters (Crassostrea gigas) in Santa Catarina State, Brazil, by reverse transcription-polymerase chain reaction.	Coelho	2003	No	No data on HAV prevalence in water matrices
2022-05-08 03:20:59	Elisabeth Zeuko'o	125	Concentration and detection of hepatitis A virus and its indicator from artificial seawater using zeolite.	Cormier	2016	No	No data on HAV prevalence in water matrices
2022-05-08 03:23:25	Elisabeth Zeuko'o	126	A comparative study of digital RT-PCR and RT-qPCR for quantification of Hepatitis A virus and Norovirus in lettuce and water samples.	Coudray-Meunier	2015	No	No data on HAV prevalence in water matrices
2022-05-08 03:25:53	Elisabeth Zeuko'o	127	Discrimination of infectious hepatitis A virus and rotavirus by combining dyes and surfactants with RT-qPCR.	Coudray-Meunier	2013	No	No data on HAV prevalence in water matrices
2022-05-08 03:27:36	Elisabeth Zeuko'o	128	Assessment and risk modeling of airborne enteric viruses emitted from wastewater reused for irrigation.	Courault	2017	No	No data on HAV prevalence in water matrices
2022-05-08 03:29:16	Elisabeth Zeuko'o	129	Effect of temperature on the survival of hepatitis A virus and its capsidal antigen in synthetic seawater.	Crance	1998	No	No data on HAV prevalence in water matrices
2022-05-08 03:31:19	Elisabeth Zeuko'o	130	A summary of waterborne illness transmitted through contaminated groundwater.	Craun	1985	No	No data on HAV prevalence in water matrices
2022-05-08 03:34:06	Elisabeth Zeuko'o	131	Spatial and temporal analysis of Hepatitis A cases in fier district, Albania, 1986–2016.	Crilly	2019	No	No data on HAV prevalence in water matrices
2022-05-09 15:25:34	Donatien Serge Mbaga	132	Determination of enteroviruses, hepatitis A virus, bacteriophages and Escherichia coli in Adriatic Sea mussels.	Croci	2000	No	No data on HAV prevalence in water matrices
2022-05-09 15:27:24	Donatien Serge Mbaga	133	Assessment of human enteric viruses in shellfish from the northern Adriatic sea.	Croci	2007	No	No data on HAV prevalence in water matrices
2022-05-09 15:30:36	Donatien Serge Mbaga	134	Waterborne diseases in waste pickers of Estrutural, Brazil, the second largest open-air dumpsite in world.	Cruvinel	2019	No	No data on HAV prevalence in water matrices
2022-05-09 15:32:02	Donatien Serge Mbaga	135	Assessment of ISO Method 15216 to Quantify Hepatitis E Virus in Bottled Water.	Cuevas-Ferrando	2020	No	No data on HAV prevalence in water matrices
2022-05-09 15:33:33	Donatien Serge Mbaga	136	HEV Occurrence in Waste and Drinking Water Treatment Plants.	Cuevas-Ferrando	2020	No	No data on HAV prevalence in water matrices
2022-05-09 15:41:11	Donatien Serge Mbaga	137	Detection of Human Enteric Viruses in Freshwater from European Countries.	D’Ugo	2016	No	No data on HAV prevalence in water matrices
2022-05-09 15:09:38	Donatien Serge Mbaga	138	Epidemiological investigations on hepatitis A and B diffusion during an outbreak in a Sicilian town in conditions of high incidence of infections.	D'Amico	1978	No	Article not in English or in French
2022-05-09 15:48:21	Donatien Serge Mbaga	139	Molecular epidemiology of hepatitis A in St. Petersburg, Russia, 1997-2003.	Davidkin	2007	No	No data on HAV prevalence in water matrices
2022-05-09 15:55:38	Donatien Serge Mbaga	140	Stability of human enteric viruses in seawater samples from mollusc depuration tanks coupled with ultraviolet irradiation.	De Abreu Corrêa	2012	No	No data on HAV prevalence in water matrices
		628	Cocirculation of and coinfections with hepatitis A virus subgenotypes IIIA and IB in patients from Pune, western India.	Chitambar	2007	Yes
2022-05-09 16:08:53	Donatien Serge Mbaga	142	Detection of rotaviruses in water by gene probes.	De Leon	1991	No	No data on HAV prevalence in water matrices
2022-05-08 03:03:14	Elisabeth Zeuko'o	118	A potential risk assessment tool to monitor pathogens circulation in coastal waters.	Cioffi	2021	Yes		cross sectional	not reported	not reported	Multicenter	urban	Prospectively	Italy; Europe; Southern Europe; High-income economies		February 2019 - August 2020	no	yes	not applicable	not applicable	not applicable	no	yes	not applicable	yes	yes	seawater				RT-PCR			225	0
		625	Hepatitis E virus epidemiology in industrialized countries.	Clemente-Casares	2003	Yes
		614	Human and bovine viruses in the Milwaukee River watershed: hydrologically relevant representation and relations with environmental variables.	Corsi	2014	Yes
2022-04-28 12:26:13	Ginette Irma Kame Ngasse	146	Detection of hepatitis A virus in environmental samples by antigen-capture PCR.	Deng	1974	No	Sample size < or = 10 participants	Cross-sectional	Non probabilistic	Convenience sampling	Multicenter	Urban/Rural	Prospectively	United States of America; America; Northern America; High-income economies		NR	No	Yes	No	Yes	Yes	No	Yes	Yes	Unclear	Yes	Septic tank effluent (STE), Swine manure slurry (SMS), Dairy cattle manure slurry (DCMS)	1000 mL	Filtration, sonication-centrifugation-filtration	Guanidinium isothiocyanate, guanidine isothiocyanate-phenol-chloroform procedure	Conventional RT-PCR, AC-PCR				8		No
2022-04-28 12:29:19	Ginette Irma Kame Ngasse	147	Control of virus contamination of water.	Denis	1980	No	Full text or abstract not found
2022-05-09 16:06:32	Donatien Serge Mbaga	141	Enteric viruses and fecal bacteria indicators to assess groundwater quality and suitability for irrigation.	De Giglio	2017	Yes		Cross-sectional	Non probabilistic	Consecutive sampling	Multicenter	Urban/Rural	Prospectively	Italy; Europe; Southern Europe; High-income economies		2014	No	Yes	No	Yes	Yes	No	Yes	Yes	No	Yes	Well water	20L	Tangential ﬂow ultraﬁltration technique	QIAamp Viral RNA mini kit	Conventional RT-PCR			364	0		No
2022-05-01 09:31:21	Ginette Irma Kame Ngasse	149	Epidemic outbreak of type A viral hepatitis in a town in the province of Florence (Rufina).	Di Maria	1981	No	No data on HAV prevalence in water matrices
2022-05-01 09:42:25	Ginette Irma Kame Ngasse	150	Comparison of different concentration methods for the detection of hepatitis A virus and calicivirus from bottled natural mineral waters.	Di Pasquale	2010	No	No data on HAV prevalence in water matrices
2022-05-01 09:50:47	Ginette Irma Kame Ngasse	151	A comparison of RT-PCR-based assays for the detection of HAV from shellfish.	Di Pinto	2004	No	No data on HAV prevalence in water matrices
2022-05-09 16:26:32	Donatien Serge Mbaga	143	Hepatitis A virus in environmental water samples from the Amazon Basin.	De Paula	2007	Yes		Cross-sectional	Non probabilistic	Consecutive sampling	Multicenter	Rural	Prospectively	Brazil; America; South America; Upper-middle-income economies		Aug/2004-Jul/2005	No	Yes	No	Yes	Yes	No	Yes	Yes	Yes	Yes	streams Water		Filtration	QIAamp Viral RNA mini kit	nested RT–PCR		VP1/2A	52	12	Genotype I	Yes	streams Water		Filtration	QIAamp Viral RNA mini kit	quantitative real-time RT–PCR		VP1/2A	52	48	Genotype I
2022-05-01 10:14:21	Ginette Irma Kame Ngasse	153	Hepatitis E virus: epidemiological, clinical and serological studies of north Indian epidemic.	Dilawari	1994	No	No data on HAV prevalence in water matrices
2022-05-01 10:17:26	Ginette Irma Kame Ngasse	154	An outbreak of water-borne infection by viral hepatitis A.	Ding	1982	No	Article not in English or in French
2022-05-01 10:24:23	Ginette Irma Kame Ngasse	155	Sewage workers: Risk of acquiring enteric virus infections including Hepatitis A.	Divizia	2008	No	No data on HAV prevalence in water matrices
2022-05-01 10:28:48	Ginette Irma Kame Ngasse	156	HAV recovery from tap water: evaluation of different types of membranes.	Divizia	1989	No	No data on HAV prevalence in water matrices
2022-05-01 11:03:20	Ginette Irma Kame Ngasse	157	Isolation of wild-type hepatitis A virus from the environment.	Divizia	1989	No	Sample size < or = 10 participants	Cross-sectional	Non probabilistic	Consecutive sampling	Multicenter	Urban/Rural	Prospectively	Italy; Europe; Southern Europe; High-income economies		NR	No	Yes	No	Yes	Yes	No	Yes	Yes	Unclear	Yes	Water samples	50-125 L	molecular ultrafiltration	Cethyl Trimethyl Ammoniu Bromide (CTAB)	commercial ELISA test, indirect immunofluorescence, neutralization test, performed with polyclonal or monoclonal antibody, and by hybridization test with cDNA probes	nr	the 3' region	5	3		No
2022-05-01 11:36:20	Ginette Irma Kame Ngasse	158	Nucleotide correlation between HAV isolates from human patients and environmental samples.	Divizia	2005	No	Sample size < or = 10 participants	Cross-sectional	Non probabilistic	Consecutive sampling	Monocenter	Urban	Prospectively	Italy; Europe; Southern Europe; High-income economies		Nov/2002 - Feb/2003	No	Yes	No	Yes	Yes	No	Yes	Yes	No	Yes	Drinking water	15 L	Polyethylene glycol precipitation	TRIzOL reagent	Nested RT-PCR		VP1/2A	5	0		Yes	Sewage sample	1.5 L	Polyethylene glycol precipitation	TRIzOL reagent	Nested RT-PCR		VP1/ 2A	5	4	Genotype IA
2022-05-01 11:55:05	Ginette Irma Kame Ngasse	159	Hepatitis A virus identification in an outbreak by enzymatic amplification.	Divizia	1993	No	Sample size < or = 10 participants	Cross-sectional	Non probabilistic	Convenience sampling	Monocenter	Urban	Prospectively	Italy; Europe; Southern Europe; High-income economies		NR	No	Yes	No	Yes	Yes	No	Yes	Yes	Unclear	Yes	Well water	100 L	Polyethylene glycol precipitation	Chloroforme	PCR			1	0		Yes	Well water	100 L	ULtrafiltration	Chloroform	PCR			1	1
2022-04-28 10:16:02	Ginette Irma Kame Ngasse	144	Molecular confirmation of hepatitis A virus from well water: Epidemiology and public health implications.	De Serres	1999	Yes		Cross-sectional	Non probabilistic	Consecutive sampling	Monocenter	Urban	Prospectively	United States of America; America; Northern America; High-income economies		May - Oct 1995	No	Yes	No	Yes	Yes	No	Yes	Yes	No	Yes	Well water	150–1000 L	Filtration, Polyethylene glycol precipitation	Chloroforme	e immunocapture reverse-transcription polymerase chain reaction (ICRT-PCR)		VP3–VP1junction and VP1– P2A junction regions	7	3	Genotype I	No
2022-04-28 11:31:52	Ginette Irma Kame Ngasse	145	Low occurrence of hepatitis A virus in water samples from an urban area of southern Brazil.	de Souza	2018	Yes		Cross-sectional	Non probabilistic	Consecutive sampling	Multicenter	Urban	Prospectively	Brazil; America; South America; Upper-middle-income economies		2012 - 2014	No	Yes	No	Yes	Yes	No	Yes	Yes	Yes	Yes	Streams water (near the source and the mouth)	500 mL	Filtration, nitrocellulose negatively charged membrane	RTP® DNA/RNA Virus Mini Kit	qPCR	2.7x103 (CG/5uL)	5'-UTR	84	1	NR	No
2022-05-01 12:42:56	Ginette Irma Kame Ngasse	162	Detection and quantification by real-time RT-PCR of hepatitis A virus from inoculated tap waters, salad vegetables, and soft fruits: Characterization of the method performances.	Dubois	2007	No	No data on HAV prevalence in water matrices
2022-05-01 09:27:33	Ginette Irma Kame Ngasse	148	Detection of human enteric viruses in stream water with RT-PCR and cell culture.	Denis-Mize	2004	Yes		Cross-sectional	Non probabilistic	Consecutive sampling	Multicenter	Urban/Rural	Prospectively	United States of America; America; Northern America; High-income economies		Dec/1997 - May/1998	No	Yes	No	Yes	Yes	No	Yes	Yes	No	Yes	Streams water	nr	Filtration, celite with 80 ml of 0.15 M Na2HPO4, pH 9.0–9.5 by gravity filtration.	The dithiozone and 8-hydroxyquinoline solutions were prepared in chloroform	multiplex RT-PCR, dot-blot hybridization	NR	NR	17	5	NR	No
2022-05-03 08:11:58	Ginette Irma Kame Ngasse	164	Food and water security issues in Russia III: food- and waterborne diseases in the Russian Arctic, Siberia and the Far East, 2000-2011.	Dudarev	2013	No	Review
2022-05-03 08:16:45	Ginette Irma Kame Ngasse	165	Status of the quality of drinking water provided to schools in the area of the Zenoj-Doboj Canton.	Durmisević	1998	No	Article not in English or in French
2022-05-03 08:19:02	Ginette Irma Kame Ngasse	166	Enteric viruses and aquatic environment.	Eifan	2013	No	Review
2022-05-03 08:23:06	Ginette Irma Kame Ngasse	167	Detection of hepatitis E virus in greater Cairo. Two wastewater treatment plants and its prevalence among workers of these plants.	El-Esnawy	1998	No	No data on HAV prevalence in water matrices
2022-05-03 08:28:48	Ginette Irma Kame Ngasse	168	Study of the association between waterborne diseases and microbial water quality in Israel.	Elkana	1996	No	Review
2022-05-03 08:43:14	Ginette Irma Kame Ngasse	169	Detection of hepatitis A virus in sewage.	Elkana	1983	No	Not possible to extract data on HAV prevalence	Cross-sectional	Non probabilistic	Consecutive sampling	Multicenter	Urban	Prospectively	Israel; Europe; Western Asia; High-income economies		NR	No	Yes	No	Yes	Yes	No	Yes	Yes	Unclear	Yes	Sewage sample	50 mL	dialysis tubing		immunoaffinity chromatography and immune electron microscopy			5	1		No
2022-05-01 10:09:01	Ginette Irma Kame Ngasse	152	Detection and quantification of human adenovirus (HAdV), JC polyomavirus (JCPyV) and hepatitis A virus (HAV) in recreational waters of Niterói, Rio de Janeiro, Brazil.	Dias	2018	Yes		Cross-sectional	Non probabilistic	Consecutive sampling	Multicenter	Urban	Prospectively	Brazil; America; South America; Upper-middle-income economies		Jan/2017 - Dec/2017	No	Yes	No	Yes	Yes	No	Yes	Yes	No	Yes	Seawater	10 L	Skimmed-milk flocculation method	Guanidinium isothiocyanate	qPCR	1.7 × 105 GC/L	NR	48	1		No
2022-05-03 09:14:17	Ginette Irma Kame Ngasse	172	Detection of Norovirus and Hepatitis A Virus in Strawberry and Green Leafy Vegetables by Using RT-qPCR in Egypt.	Elmahdy	2022	No	No data on HAV prevalence in water matrices
2022-05-01 12:15:57	Ginette Irma Kame Ngasse	160	Application of the PCR technique to the detection of hepatitis A virus in the environment.	Divizia	1993	Yes		Cross-sectional	Non probabilistic	Consecutive sampling	Monocenter	Rural	Prospectively	Italy; Europe; Southern Europe; High-income economies		NR	No	Yes	No	Yes	Yes	No	Yes	Yes	Unclear	Yes	River water	NR	NR	NR	ELISA method	NR		13	2		Yes	River water				cell culture			13	3		River water
2022-05-03 09:34:19	Ginette Irma Kame Ngasse	174	Assessment and Evaluation of an Integrated Hybrid Anaerobic–Aerobic Sewage Treatment System for the Removal of Enteric Viruses.	El-Senousy	2017	No	No data on HAV prevalence in water matrices
2022-05-03 09:44:49	Ginette Irma Kame Ngasse	175	Survival of the enteric adenoviruses 40 and 41 in tap, sea, and waste water.	Enriquez	1995	No	No data on HAV prevalence in water matrices
2022-05-03 09:48:42	Ginette Irma Kame Ngasse	176	Accumulation and persistence of hepatitis A virus in mussels.	Enriquez	1992	No	No data on HAV prevalence in water matrices
2022-05-03 09:51:21	Ginette Irma Kame Ngasse	177	Epidemiologic study of a water-borne outbreak of hepatitis A.	Errezola Saizar	1983	No	Full text or abstract not found
2022-05-03 10:11:30	Ginette Irma Kame Ngasse	178	Detection of hepatitis A virus in wastewater.	Espigares	1999	No	Sample size < or = 10 participants	Cross-sectional	Non probabilistic	Consecutive sampling	Monocenter	Urban	Prospectively	Spain; Europe; Southern Europe; High-income economies		April 1996	No	Yes	No	Yes	Yes	No	Yes	Yes	No	Yes	Sewage effluent, Sewage influent										Yes	Sewage effluent, Sewage influent	1 L	floculation	guanidinium thiocyanate-phenol-chloroform	Conventional RT-PCR		cDNA synthesis	10	7		Sewage effluent, Sewage influent	200 mL
2022-05-03 10:19:22	Ginette Irma Kame Ngasse	179	[Studies and application method and quality control system for detecting hepatitis A virus in water for fruits and vegetables production].	Fang	2017	No	Article not in English or in French	Cross-sectional	Non probabilistic	Consecutive sampling	Monocenter	Urban	Prospectively	China; Western Pacific; Eastern Asia; Upper-middle-income economies		NR	No	Yes	No	Yes	Yes	No	Yes	Yes	Unclear	Yes	Water samples		positively charged membrane filter		Real-time RT-PCR			30	1		No
2022-05-01 12:38:09	Ginette Irma Kame Ngasse	161	Hepatitis A virus detection in wastewater by PCR and hybridization.	Divizia	1998	Yes		Cross-sectional	Non probabilistic	Consecutive sampling	Multicenter	Urban/Rural	Prospectively	Italy; Europe; Southern Europe; High-income economies		NR	No	Yes	No	Yes	Yes	No	Yes	Yes	Unclear	Yes	Sewage sample		Ultrafiltration		PCR (AC-PCR) followed by a hybridization			10	8		Yes	Raw sewage		electronegative (HAWP Millipore)		AC-PCR followed by hybridation			10	2		Raw sewage
2022-05-03 10:48:37	Ginette Irma Kame Ngasse	181	Evaluation of Two Triplex One-Step qRT-PCR Assays for the Quantification of Human Enteric Viruses in Environmental Samples.	Farkas	2017	No	No data on HAV prevalence in water matrices
2022-05-03 10:53:30	Ginette Irma Kame Ngasse	182	Epidemic of viral hepatitis apparently spread by drinking water and by contact.	Farquhar	1952	No	No data on HAV prevalence in water matrices
2022-05-03 10:57:21	Ginette Irma Kame Ngasse	183	The prevalence of viral hepatitis and other enteric disease in communities utilizing wastewater in agriculture.	Fattal	1983	No	No data on HAV prevalence in water matrices
2022-05-10 10:53:03	Sebastien Kenmoe	163	Detection of hepatitis A virus and other enteroviruses in wastewater and surface water samples by gene probe assay.	Dubrou	1991	Yes		Cross-sectional	Non probabilistic	Consecutive sampling	Monocenter	Unclear/Not reported	Prospectively	France; Europe; Western Europe; High-income economies		nr	No	Yes	No	Not applicable	Yes	No	Yes	Yes	Unclear	Yes	Wastewater sample				Molecular hybridization			44	33		No
2022-05-03 11:19:21	Ginette Irma Kame Ngasse	185	Metagenomics for the study of viruses in urban sewage as a tool for public health surveillance.	Fernandez-Cassi	2018	No	No data on HAV prevalence in water matrices
2022-05-03 09:08:27	Ginette Irma Kame Ngasse	170	Enteric viruses in surface water and sediment samples from the catchment area of Peri Lagoon, Santa Catarina State, Brazil.	Elmahdy	2016	Yes		Cross-sectional	Non probabilistic	Consecutive sampling	Multicenter	Urban/Rural	Prospectively	Brazil; America; South America; Upper-middle-income economies		Mar/2013 - Aug/2013	No	Yes	No	Yes	Yes	No	Yes	Yes	No	Yes	River water	2 L	Polyethylene glycol precipitation, electronegative membrane and ultrafiltration	QIAmp MinElute Virus Spin Kit	qRT-PCR	5.45 × 10 1 to 1.11 × 10 3 GC L-1	Sequence 5' -3'	48	14		No
2022-05-03 11:44:58	Ginette Irma Kame Ngasse	187	[Isolation of infectious hepatitis A viruses from clearing sludge].	Flehmig	1988	No	Article not in English or in French
2022-05-03 09:27:57	Ginette Irma Kame Ngasse	173	Spatial distribution of enteric viruses and somatic coliphages in a Lagoon used as drinking water source and recreation in Southern Brazil.	Elmahdy	2016	Yes		Cross-sectional	Non probabilistic	Consecutive sampling	Multicenter	Urban/Rural	Prospectively	Brazil; America; South America; Upper-middle-income economies		Jan/2014 - Dec/2014	No	Yes	No	Yes	Yes	No	Yes	Yes	Yes	Yes	Surface water	2 L	Filtration, Polyethylene glycol precipitation	QIAmp MinElute Virus Spin Kit	qPCR/RT-qPCR	m 1.1 × 10 2 to 4.3 × 10 3 gc/L.		48	13		No
2022-05-03 12:17:44	Ginette Irma Kame Ngasse	189	Human and animal enteric virus in groundwater from deep wells, and recreational and network water.	Fongaro	2015	No	Sample size < or = 10 participants	Cross-sectional	Non probabilistic	Consecutive sampling	Multicenter	Urban	Prospectively	Brazil; America; South America; Upper-middle-income economies		Aug/2011 - Jan/2012	No	Yes	No	Yes	Yes	No	Yes	Yes	No	Yes											Yes	Drinking water	nr	negatively charged membrane and reconcentrated by Centriprep® YM50 (Millipore) device.	QIAmp MinElute Virus Spin Kit	Real-time qPCR			6	0		Groundwater	nr
2022-05-03 10:45:13	Ginette Irma Kame Ngasse	180	Seasonal and spatial dynamics of enteric viruses in wastewater and in riverine and estuarine receiving waters.	Farkas	2018	Yes		Cross-sectional	Non probabilistic	Consecutive sampling	Multicenter	Urban	Prospectively	United Kingdom; Europe; Northern Europe; High-income economies		Aug/2016 - Aug/2017	No	Yes	No	Yes	Yes	No	Yes	Yes	Yes	Yes	Surface water, effluent and influent wastewater	10 L	Polyethylene glycol precipitation	NucliSens miniMAG	qRT-PCR			143	0		No
2022-05-03 11:14:45	Ginette Irma Kame Ngasse	184	Detection and phylogenetic analysis of hepatitis a virus and norovirus in marine recreational waters of Mexico.	Félix	2010	Yes		Cross-sectional	Non probabilistic	Consecutive sampling	Multicenter	Urban/Rural	Prospectively	Mexico; America; Central America; Upper-middle-income economies		Nov/2005 - Jul/2006	No	Yes	No	Yes	Yes	No	Yes	Yes	No	Yes	marine recreational waters		EPA adsorption-elution method	QIAamp Viral RNA mini kit	Conventional RT-PCR		VP1-VP2	32	3	Genotype I, sub genotype B	No
2022-05-03 11:42:43	Ginette Irma Kame Ngasse	186	Presence of hepatitis a virus in water and its relationship with indicators of fecal contamination.	Fernández-Molina	2004	Yes		Cross-sectional	Non probabilistic	Consecutive sampling	Multicenter	Rural	Prospectively	Spain; Europe; Southern Europe; High-income economies		NR	No	Yes	No	Yes	Yes	No	Yes	Yes	Unclear	Yes	River water, Spring water	2 L	Aluminum hydroxide adsorption-precipitation method	guanidine thiocyanate-phenol-chloroform	reverse transcriptase PCR, semi-nested PCR and hybridization		VP3, VP1	51	16		Yes	Spring water	2 L	Aluminum hydroxide adsorption-precipitation method	Guanidinium isothiocyanate-Phenol-Chloroforme	reverse transcriptase PCR, semi-nested PCR and hybridization		VP3, VP1	28	0		River water	2 L
2022-05-03 11:57:04	Ginette Irma Kame Ngasse	188	Surveillance of human viral contamination and physicochemical profiles in a surface water lagoon.	Fongaro	2012	Yes		Cross-sectional	Non probabilistic	Consecutive sampling	Multicenter	Urban	Prospectively	Brazil; America; South America; Upper-middle-income economies		Jun/2010 - May/2011	No	Yes	No	Yes	Yes	No	Yes	Yes	Yes	Yes	Surface water	2 L	a negatively-charged membrane and reconcentrated Centriprep® YM50 (Millipore) device	QIAmp MinElute Virus Spin Kit	Real time qPCR	7.81 × 10 1 to 1.33 × 10 5 gc/L		48	5.7		No
2022-04-28 14:49:08	Guy Roussel Takuissu	195	Detection of Hepatitis A Virus and Other Enteric Viruses in Shellfish Collected in the Gulf of Naples, Italy.	Fusco	2019	No	No data on HAV prevalence in water matrices
2022-04-28 14:52:19	Guy Roussel Takuissu	196	Adsorption-elution with negatively and positively-charged glass powder for the concentration of hepatitis A virus from water.	Gajardo	1991	No	No data on HAV prevalence in water matrices
2022-04-28 14:55:34	Guy Roussel Takuissu	198	Does hepatitis A pose a significant health risk to recreational water users?	Gammie	1997	No	No data on HAV prevalence in water matrices
2022-04-28 14:57:06	Guy Roussel Takuissu	199	Evaluation of the secondary attack rate in families with viral hepatitis: a three year study in former year district of Sarajevo, Yugoslavia.	Gaon	1975	No	No data on HAV prevalence in water matrices
2022-04-28 14:58:46	Guy Roussel Takuissu	200	Characteristics of water-borne epidemics of viral hepatitis in Yugoslavia.	Gaon	1982	No	No data on HAV prevalence in water matrices
2022-04-28 15:00:15	Guy Roussel Takuissu	201	Mortality from selected diseases that can be transmitted by water - United States, 2003-2009.	Gargano	2017	No	No data on HAV prevalence in water matrices
2022-04-28 15:03:36	Guy Roussel Takuissu	202	Exposure to enteroviruses and hepatitis A virus among divers in environmental waters in France, first biological and serological survey of a controlled cohort.	Garin	1994	No	No data on HAV prevalence in water matrices
2022-04-28 15:05:59	Guy Roussel Takuissu	203	An epidemic of waterborne infectious hepatitis in France.	Gavan	1970	No	No data on HAV prevalence in water matrices
2022-05-03 12:30:30	Ginette Irma Kame Ngasse	190	Mineral Waste Containing High Levels of Iron from an Environmental Disaster (Bento Rodrigues, Mariana, Brazil) is Associated with Higher Titers of Enteric Viruses.	Fongaro	2019	Yes		Cross-sectional	Non probabilistic	Consecutive sampling	Multicenter	Urban	Prospectively	Brazil; America; South America; Upper-middle-income economies		May 2016	No	Yes	No	Yes	Yes	No	Yes	Yes	No	Yes	Water samples	1 L	glycine buffer method coupled with polyethylene glycol precipitation.	QIAmp MinElute Virus Spin Kit	qPCR with a StepOne Plus Real-Time PCR System	1*10 1 to 1* 10 5 gc/L		45	39		No
2022-04-28 15:24:52	Guy Roussel Takuissu	205	Hepatitis A outbreak due to contaminated public water in Tiruchirappalli Corporation, Tamil Nadu, India, 2015.	Geetharani	2016	No	No data on HAV prevalence in water matrices
2022-04-28 15:26:42	Guy Roussel Takuissu	206	Enteric virus: Risk assessment of ocean disposal of sewage sludge.	Gerba	1988	No	No data on HAV prevalence in water matrices
2022-04-28 15:28:15	Guy Roussel Takuissu	207	Application of gene probes to virus detection in water.	Gerba	1989	No	No data on HAV prevalence in water matrices
2022-04-28 15:30:00	Guy Roussel Takuissu	208	Enterovirus detection in water with gene probes.	Gerba	1988	No	No data on HAV prevalence in water matrices
2022-04-28 14:20:47	Guy Roussel Takuissu	191	Nested multiplex PCR assay for detection of human enteric viruses in shellfish and sewage.	Formiga-Cruz	2005	Yes		Unclear/ Not reported	Unclear/ Not reported	Unclear/ Not reported	Monocenter	Urban	Prospectively	Spain; Europe; Southern Europe; High-income economies		June 2001 - August 2003	No	Unclear	Not applicable	Not applicable	Not applicable	Not applicable	Yes	Unclear	Yes	Yes	Raw sewage				Conventional RT-PCR			10	2		No
2022-04-28 15:47:40	Guy Roussel Takuissu	210	Hepatitis A outbreak in Ba subdivision, Fiji, October&#x2013;December 2013.	Getahun	2015	No	No data on HAV prevalence in water matrices
2022-04-28 15:55:12	Guy Roussel Takuissu	212	A 1-year study of the epidemiology of hepatitis A virus in Tunisia.	Gharbi-khelifi	2007	No	Not possible to extract data on HAV prevalence
2022-04-28 15:56:37	Guy Roussel Takuissu	213	Three-step isolation method for sensitive detection of enterovirus, rotavirus, hepatitis A virus, and small round structured viruses in water samples.	Gilgen	1997	No	Sample size < or = 10 participants
2022-04-28 15:57:25	Guy Roussel Takuissu	214	Natural inactivation of enteric viruses in seawater.	Girones	1989	No	No data on HAV prevalence in water matrices
2022-04-28 14:35:09	Guy Roussel Takuissu	192	A multiplex reverse transcription-PCR method for detection of human enteric viruses in groundwater.	Fout	2003	Yes		Unclear/ Not reported	Unclear/ Not reported	Unclear/ Not reported	Multicenter	Unclear/Not reported	Prospectively	United States of America; America; Northern America; High-income economies		NR	Not applicable	Unclear	Not applicable	Not applicable	Not applicable	Not applicable	Yes	Unclear	Yes	Yes	Groundwater				Conventional RT-PCR			321	3		No
2022-04-28 16:01:59	Guy Roussel Takuissu	216	Dissecting microbial community structure in sewage treatment plant for pathogens’ detection using metagenomic sequencing technology.	Giwa	2020	No	No data on HAV prevalence in water matrices
2022-04-28 16:06:46	Guy Roussel Takuissu	217	Fecal pollution source tracking and thalassogenic diseases: The temporal-spatial concordance between maximum concentrations of human mitochondrial DNA in seawater and Hepatitis A outbreaks among a coastal population.	González-Saldía	2019	No	No data on HAV prevalence in water matrices
2022-04-28 16:08:13	Guy Roussel Takuissu	218	Detection of hepatitis A virus in Mercenaria mercenaria by coupled reverse transcription and polymerase chain reaction.	Goswami	1993	No	No data on HAV prevalence in water matrices
2022-04-28 16:10:20	Guy Roussel Takuissu	219	Hepatitis A outbreak in men having sex with men in Israel 2017: Environmental and clinical surveillance.	Gozlan	2018	No	No data on HAV prevalence in water matrices
2022-04-28 14:47:37	Guy Roussel Takuissu	194	Enteric viruses’ dissemination in a private reserve of natural heritage.	Fumian	2018	Yes		Unclear/ Not reported	Unclear/ Not reported	Unclear/ Not reported	Monocenter	Unclear/Not reported	Prospectively	Brazil; America; South America; Upper-middle-income economies		2009 - 2012	Not applicable	Unclear	Not applicable	Not applicable	Not applicable	Not applicable	Yes	Not applicable	Yes	Yes	Drinking water, River water, Wastewater sample							43	8		No
2022-04-28 15:22:28	Guy Roussel Takuissu	204	Assessment of the prevalence of enteric viruses in the final effluents of two peri-urban wastewater treatment plants.	Gcilitshana	2017	Yes		Unclear/ Not reported	Unclear/ Not reported	Unclear/ Not reported	Multicenter	Urban	Prospectively	South Africa; Africa; Southern Africa; Upper-middle-income economies		September 2012 - August 2013.	Not applicable	Unclear	Not applicable	Not applicable	Not applicable	Not applicable	Yes	Not applicable	Yes	Yes	Wastewater sample				Conventional RT-PCR	24-71		12	2		No
2022-04-28 16:29:59	Guy Roussel Takuissu	223	Inactivation of hepatitis A virus and indicator organisms in water by free chlorine residuals.	Grabow	1983	No	No data on HAV prevalence in water matrices
2022-04-28 15:46:28	Guy Roussel Takuissu	209	Quantitative detection of hepatitis A virus and enteroviruses near the United States-Mexico border and correlation with levels of fecal indicator bacteria.	Gersberg	2006	Yes		Unclear/ Not reported	Unclear/ Not reported	Unclear/ Not reported	Multicenter	Unclear/Not reported	Prospectively	United States of America; America; Northern America; High-income economies		2003 - 2005	Not applicable	Unclear	Not applicable	Not applicable	Not applicable	Not applicable	Yes	Not applicable	Yes	Yes	Seawater				Conventional RT-PCR			14	11		No
2022-04-28 16:39:21	Guy Roussel Takuissu	225	Inactivation of hepatitis A virus, other enteric viruses and indicator organisms in water by chlorination.	Grabow	1985	No	No data on HAV prevalence in water matrices
2022-04-28 16:42:49	Guy Roussel Takuissu	226	Selection of indicator systems for human viruses in polluted seawater and shellfish.	Grabow	1989	No	No data on HAV prevalence in water matrices
2022-04-28 16:44:19	Guy Roussel Takuissu	227	Studies on the isolation and identification of hepatitis viruses in water.	Grabow	1978	No	Not possible to extract data on HAV prevalence
2022-04-28 16:50:41	Guy Roussel Takuissu	228	Detection of hepatitis A virus in sewage sludge by antigen capture polymerase chain reaction.	Graff	1993	No	Sample size < or = 10 participants
2022-04-28 16:54:40	Guy Roussel Takuissu	229	Enzymatic amplification of enteric viruses from wastewaters.	Green	1995	No	No data on HAV prevalence in water matrices
2022-04-28 16:57:44	Guy Roussel Takuissu	230	Comparative detection of enteric viruses in wastewaters, sediments and oysters by reverse transcription-PCR and cell culture.	Green	1999	No	Not possible to extract data on HAV prevalence
2022-04-28 16:59:03	Guy Roussel Takuissu	231	Pathogenic human viruses in coastal waters.	Griffin	2003	No	Review
2022-04-28 17:11:28	Guy Roussel Takuissu	232	Detection of viral pathogens by reverse transcriptase PCR and of microbial indicators by standard methods in the canals of the Florida Keys.	Griffin	1999	No	Not possible to extract data on HAV prevalence	Unclear/ Not reported	Unclear/ Not reported	Cluster sampling	Multicenter	Unclear/Not reported	Prospectively	United States of America; America; Northern America; High-income economies		September 1997- August 1998	Not applicable	Unclear	Not applicable	Not applicable	Not applicable	Not applicable	Yes	Not applicable	Yes	Yes	Unclear/ Not reported				Conventional RT-PCR			19	13		No
2022-04-28 17:14:55	Guy Roussel Takuissu	233	Metagenomic insights into the sewage RNA virosphere of a large city.	Guajardo-Leiva	2020	No	No data on HAV prevalence in water matrices
		630	Characterization of outbreak hepatitis a isolates in five Tunisian childcare centers.	Gharbi-Khelifi	2011	Yes
2022-04-28 17:22:55	Guy Roussel Takuissu	235	Epidemiological investigation of an acute viral hepatitis outbreak in an urbanized rural area in a North Indian Union Territory.	Gupta	2019	No	No data on HAV prevalence in water matrices
2022-04-28 17:28:15	Guy Roussel Takuissu	236	[Quality of water for human consumption and its association with morbimortality in Colombia, 2008-2012].	Guzmán	2015	No	No data on HAV prevalence in water matrices
2022-04-28 17:33:46	Guy Roussel Takuissu	237	The role of water use patterns and sewage pollution in incidence of water-borne/enteric diseases along the Ganges River in Varanasi, India.	Hamner	2006	No	No data on HAV prevalence in water matrices
2022-04-28 15:59:19	Guy Roussel Takuissu	215	Detection of adenovirus and enterovirus by PCR amplification in polluted waters.	Girones	1995	Yes
2022-05-02 09:26:27	Jean Thierry Ebogo Belobo	239	Prevalence of enteric hepatitis A and E viruses in the Mekong River delta region of Vietnam.	Hau	1999	No	No data on HAV prevalence in water matrices
2022-04-28 16:16:31	Guy Roussel Takuissu	220	Lessons from intensified surveillance of viral hepatitis a, Israel, 2017 and 2018.	Gozlan	2021	Yes		Unclear/ Not reported	Unclear/ Not reported	Unclear/ Not reported	Multicenter	Rural	Prospectively	Israel; Europe; Western Asia; High-income economies		January 2017 - December 2018	Not applicable	Unclear	Not applicable	Not applicable	Not applicable	Not applicable	Yes	Not applicable	Yes	Yes	Sewage sample				Conventional RT-PCR			240	87		No
2022-05-02 09:42:09	Jean Thierry Ebogo Belobo	241	Epidemics of water-borne viral hepatitis type A in the CR.	Helcl	1990	No	Full text or abstract not found
2022-05-02 09:46:03	Jean Thierry Ebogo Belobo	242	Detection of pathogenic viruses in sewage provided early warnings of hepatitis A virus and norovirus outbreaks.	Hellmér	2014	No	No data on HAV prevalence in water matrices
2022-05-02 09:49:37	Jean Thierry Ebogo Belobo	243	Evaluation of three different filters and two methods for recovering viruses from drinking water.	Hennechart-Collette	2020	No	No data on HAV prevalence in water matrices
2022-05-02 09:53:16	Jean Thierry Ebogo Belobo	244	Detection of norovirus, hepatitis A and hepatitis E viruses in multicomponent foodstuffs.	Hennechart-Collette	2021	No	No data on HAV prevalence in water matrices
2022-05-02 09:56:12	Jean Thierry Ebogo Belobo	245	Determination of which virus to use as a process control when testing for the presence of hepatitis A virus and norovirus in food and water.	Hennechart-Collette	2015	No	No data on HAV prevalence in water matrices
2022-05-02 10:36:18	Jean Thierry Ebogo Belobo	246	Comparison of ozone inactivation, in flowing water, of hepatitis A virus, poliovirus 1, and indicator organisms.	Herbold	1989	No	No data on HAV prevalence in water matrices
2022-04-28 16:23:35	Guy Roussel Takuissu	222	Circulation of hepatitis a genotypes in Israel 2017-2018: Environmental surveillance supports clinical findings.	Gozlan	2019	Yes		Unclear/ Not reported	Unclear/ Not reported	Unclear/ Not reported	Unclear/ Not reported	Unclear/Not reported	Prospectively	Israel; Europe; Western Asia; High-income economies		2017-2018	Not applicable	Unclear	Not applicable	Not applicable	Not applicable	Not applicable	Yes	Not applicable	Unclear	Yes	Sewage sample				Conventional RT-PCR			220	73	Genotype I	No
2022-05-02 13:47:46	Jean Thierry Ebogo Belobo	248	Environmental factors influencing human viral pathogens and their potential indicator organisms in the blue mussel, Mytilus edulis: The first Scandinavian report.	Hernroth	2002	No	No data on HAV prevalence in water matrices
2022-05-02 14:02:38	Jean Thierry Ebogo Belobo	249	Waterborne-disease outbreaks, 1989-1990.	Herwaldt	1991	No	No data on HAV prevalence in water matrices
2022-05-02 14:22:09	Jean Thierry Ebogo Belobo	250	Effect of heat treatment on hepatitis A virus and norovirus in New Zealand Greenshell mussels (Perna canaliculus) by quantitative real-time reverse transcription PCR and cell culture.	Hewitt	2006	No	No data on HAV prevalence in water matrices
2022-05-02 14:37:12	Jean Thierry Ebogo Belobo	251	Characterization of effluent water qualities from satellite membrane bioreactor facilities.	Hirani	2013	No	No data on HAV prevalence in water matrices
2022-05-02 14:40:41	Jean Thierry Ebogo Belobo	252	Hepatitis E outbreak in a low income urban community in Bangladesh.	Hossain	2009	No	No data on HAV prevalence in water matrices
2022-04-28 16:37:47	Guy Roussel Takuissu	224	New methods for the detection of viruses: call for review of drinking water quality guidelines.	Grabow	2001	Yes		Unclear/ Not reported	Unclear/ Not reported	Unclear/ Not reported	Unclear/ Not reported	Unclear/Not reported	Prospectively	South Africa; Africa; Southern Africa; Upper-middle-income economies		NR	Not applicable	Unclear	Not applicable	Not applicable	Not applicable	Not applicable	Yes	Not applicable	Yes	Yes	Drinking water				Conventional RT-PCR			413	12		No
2022-05-02 14:57:18	Jean Thierry Ebogo Belobo	254	MOL-PCR and xMAP Technology: A Multiplex System for Fast Detection of Food- and Waterborne Viruses.	Hrdy	2021	No	No data on HAV prevalence in water matrices
2022-05-02 14:59:36	Jean Thierry Ebogo Belobo	255	Outbreaks of waterborne disease in the United States, 1973.	Hughes	1975	No	No data on HAV prevalence in water matrices
2022-05-02 15:02:06	Jean Thierry Ebogo Belobo	256	A comparison of different concentration methods for the detection of viruses present in bottled waters and those adsorbed to water bottle surfaces.	Huguet	2012	No	No data on HAV prevalence in water matrices
2022-04-28 17:19:46	Guy Roussel Takuissu	234	Occurrence of water-borne enteric viruses in two settlements based in Eastern Chad: Analysis of hepatitis E virus, hepatitis A virus and human adenovirus in water sources.	Guerrero-Latorre	2011	Yes		cross sectional	Non probabilistic	Consecutive sampling	Multicenter	Unclear/Not reported	Prospectively	Chad; Africa; Central Africa; Low-income economies		nr	no	yes	no	not applicable	yes	no	yes	yes	unclear	yes	Wells, boreholes		Filtration	QIAamp Viral RNA mini kit	Conventional RT-PCR			11	0
2022-05-02 09:24:33	Jean Thierry Ebogo Belobo	238	Detection of enteric viruses in wastewater of Monastir region by RT-PCR method.	Hassine	2010	Yes		Cross-sectional	Non probabilistic	Consecutive sampling	Multicenter	Urban	Prospectively	Tunisia; Eastern Mediterranean; Northern Africa; Lower-middle income economies		Oct/2005-Jul/2006	No	No	No	Not applicable	Not applicable	Not applicable	Yes	Yes	No	Yes	Sewage sample	100 mL	Polyethylene glycol precipitation	TRI Reagent	Conventional RT-PCR		jonction VP1-VP3	93	10		No
2022-05-03 18:28:54	Jean Thierry Ebogo Belobo	260	Detection waterborne diseases associated viruses in the river water Metro Manila and Bulacan, the Philippines.	Imagawa	2010	No	Not possible to extract data on HAV prevalence
2022-05-03 18:30:10	Jean Thierry Ebogo Belobo	261	Epidemiological and genetic analysis of a diffuse outbreak of hepatitis A in Japan, 2010.	Ishii	2011	No	No data on HAV prevalence in water matrices
2022-05-03 18:37:41	Jean Thierry Ebogo Belobo	262	Microfluidic quantitative PCR for simultaneous quantification of multiple viruses in environmental water samples.	Ishii	2014	No	No data on HAV prevalence in water matrices
2022-05-11 06:02:16	Sebastien Kenmoe	240	Detection of enteroviruses and mammalian reoviruses in Korean environmental waters.	Hee	2006	Yes		Cross-sectional	Non probabilistic	Consecutive sampling	Monocenter	Unclear/Not reported	Prospectively	South Korea; Western Pacific; Eastern Asia; High-income economies		Aug/2001-Jul/2005	No	Yes	No	Not applicable	Yes	No	Yes	Yes	Yes	Yes	Surface water		Filtration		Culture			223	0		Yes	Finished water				Culture			92	0		Tap water
2022-05-03 18:58:23	Jean Thierry Ebogo Belobo	264	Application of RT-PCR for the detection of enteric viruses in oysters.	Jaykus	1993	No	No data on HAV prevalence in water matrices
2022-05-03 19:07:09	Jean Thierry Ebogo Belobo	265	Detection of hepatitis A virus by the nucleic acid sequence-based amplification technique and comparison with reverse transcription-PCR.	Jean	2001	No	No data on HAV prevalence in water matrices
2022-05-02 13:56:47	Jean Thierry Ebogo Belobo	247	Detection and characterization of hepatitis a virus and norovirus in estuarine water samples using ultrafiltration - RT-PCR integrated methods.	Hernandez-Morga	2009	Yes		Cross-sectional	Non probabilistic	Consecutive sampling	Multicenter	Urban	Prospectively	Mexico; America; Central America; Upper-middle-income economies		Sep/2006-Apr/2007	No	No	No	Not applicable	Not applicable	Not applicable	Yes	Yes	No	Yes	Water samples	20 litres	Ultracentrifugation technique	QIAamp Viral RNA mini kit	Conventional RT-PCR			40	32	Genotype I	No
2022-05-02 14:54:18	Jean Thierry Ebogo Belobo	253	Detection of somatic phages, infectious enteroviruses and enterovirus genomes as indicators of human enteric viral pollution in surface water.	Hot	2003	Yes		Cross-sectional	Non probabilistic	Consecutive sampling	Multicenter	Urban	Prospectively	France; Europe; Western Europe; High-income economies		Feb/1999-Jan/2000	No	No	No	Not applicable	Not applicable	No	Yes	Yes	Yes	Yes	Surface water	20L	Filtration, Polyethylene glycol precipitation	QIAamp Viral RNA mini kit	Conventional RT-PCR			68	1		No
2022-05-02 15:19:05	Jean Thierry Ebogo Belobo	257	One-year Surveillance of Human Enteric Viruses in Raw and Treated Wastewaters, Downstream River Waters, and Drinking Waters.	Iaconelli	2017	Yes		Cross-sectional	Non probabilistic	Consecutive sampling	Multicenter	Urban	Prospectively	Italy; Europe; Southern Europe; High-income economies		Jan/2013-Dec/2013	No	No	No	Not applicable	Not applicable	No	Yes	Yes	Yes	Yes	Untreated wastewater		Polyethylene glycol precipitation	NucliSens miniMAG	Conventional RT-PCR			21	7		Yes	Treated effluent		Polyethylene glycol precipitation	NucliSens miniMAG	Conventional RT-PCR			21	4		Ultrafiltered effluent
2022-05-04 09:49:21	Jean Thierry Ebogo Belobo	269	Detection of hepatitis A virus in seeded estuarine samples by hybridization with cDNA probes.	Jiang	1986	No	No data on HAV prevalence in water matrices
2022-05-04 10:35:23	Jean Thierry Ebogo Belobo	270	Detection of hepatitis A virus by hybridization with single-stranded RNA probes.	Jiang	1987	No	No data on HAV prevalence in water matrices
2022-05-04 10:38:28	Jean Thierry Ebogo Belobo	272	Waterborne diseases in the state of Mexico, Mexico (2000-2005).	Jiménez-Moleón	2011	No	No data on HAV prevalence in water matrices
2022-05-04 10:46:45	Jean Thierry Ebogo Belobo	273	Large outbreak of hepatitis A in Kerala [1].	John	2006	No	No data on HAV prevalence in water matrices
2022-05-03 18:06:38	Jean Thierry Ebogo Belobo	258	Hepatitis A and E Viruses in Wastewaters, in River Waters, and in Bivalve Molluscs in Italy.	Iaconelli	2015	Yes		Cross-sectional	Non probabilistic	Consecutive sampling	Multicenter	Urban	Prospectively	Italy; Europe; Southern Europe; High-income economies		2013	No	No	No	Not applicable	Not applicable	No	Yes	Yes	Yes	Yes	Raw sewage	500mL	Polyethylene glycol precipitation	NucliSENS easyMAG	Conventional RT-PCR		VP1/2A	21	7	Genotype I, 7	Yes	Treated sewage	500mL	Polyethylene glycol precipitation	NucliSENS easyMAG	Conventional RT-PCR		VP1/2A	21	3	Genotype I, 3	River water	500mL
2022-05-03 18:54:30	Jean Thierry Ebogo Belobo	263	Detection of enteric viruses and bacterial indicators in a sewage treatment center and shallow water bay.	Janahi	2020	Yes		Cross-sectional	Non probabilistic	Consecutive sampling	Monocenter	Urban	Prospectively	Bahrain; Eastern Mediterranean; Western Asia; High-income economies		NR	No	No	No	Not applicable	Not applicable	No	Yes	Yes	No	Yes	Wastewater sample	2l	Filtration	Pure Link Viral DNA/RNA mini kit	Conventional RT-PCR			59	2		No
2022-05-03 19:34:26	Jean Thierry Ebogo Belobo	266	Presence and fate of coliphages and enteric viruses in three wastewater treatment plants effluents and activated sludge from Tunisia.	Jebri	2012	Yes		Cross-sectional	Non probabilistic	Consecutive sampling	Multicenter	Urban	Prospectively	Tunisia; Eastern Mediterranean; Northern Africa; Lower-middle income economies		Jan/2009-Aug/2009	No	No	No	Not applicable	Not applicable	No	Yes	Yes	No	Yes	Wastewater sample	100 ml	Polyethylene glycol precipitation	Tri-reagent	Conventional RT-PCR			48	0		No
2022-05-04 12:51:10	Jean Thierry Ebogo Belobo	278	Development of an RNA extraction protocol for detection of waterborne viruses by reverse transcriptase quantitative PCR (RT-qPCR).	Jothikumar	2010	No	No data on HAV prevalence in water matrices
2022-05-04 13:00:43	Jean Thierry Ebogo Belobo	279	Sanitary Survey of Drinking Water Quality in Plateau State, Nigeria.	Junaid	2014	No	No data on HAV prevalence in water matrices
2022-05-03 19:53:00	Jean Thierry Ebogo Belobo	267	Comparison of immunological and molecular hybridization detection methods for the detection of hepatitis A virus in sewage.	Jehl-Pietri	1993	Yes		Cross-sectional	Non probabilistic	Consecutive sampling	Monocenter	Urban	Prospectively	France; Europe; Western Europe; High-income economies		NR	No	No	No	Not applicable	Not applicable	No	Yes	Yes	Unclear	Yes	Sewage effluent	20L	adsorption-elution on powdered glass		Immune electron microscopy			13	6		Yes	Sewage effluent	20L	adsorption-elution on powdered glass		Radioimmunoussa)			13	0		Sewage effluent	20L
2022-05-03 20:21:44	Jean Thierry Ebogo Belobo	268	PCR detection of pathogenic viruses in southern California urban rivers.	Jiang	2004	Yes		Cross-sectional	Non probabilistic	Consecutive sampling	Multicenter	Urban	Prospectively	United States of America; America; Northern America; High-income economies		Jul/2000-Aug/2000	No	No	No	Not applicable	Not applicable	No	Yes	Yes	No	Yes	River water		Filtration		Conventional RT-PCR			21	16		No
2022-05-04 13:53:26	Jean Thierry Ebogo Belobo	282	Detection of Human Enteric Viruses in French Polynesian Wastewaters, Environmental Waters and Giant Clams.	Kaas	2019	No	Sample size < or = 10 participants
2022-05-04 13:57:34	Jean Thierry Ebogo Belobo	283	Hepatitis A and E outbreak surveillance during 2015–2017 in Kashmir, India: Is the water to blame?	Kadri	2018	No	No data on HAV prevalence in water matrices
2022-05-04 14:04:13	Jean Thierry Ebogo Belobo	284	Changes in Microbial Composition of Wastewater During Treatment in a Full-Scale Plant.	Kaevska	2016	No	No data on HAV prevalence in water matrices
2022-05-04 11:09:49	Jean Thierry Ebogo Belobo	274	Waterborne Viruses and F-Specific Coliphages in Mixed-Use Watersheds: Microbial Associations, Host Specificities, and Affinities with Environmental/Land Use Factors.	Jones	2017	Yes		Cross-sectional	Non probabilistic	Consecutive sampling	Multicenter	Urban	Prospectively	Canada; America; Northern America; High-income economies		2008-2010; 2013-2014	No	No	No	Not applicable	Not applicable	No	Yes	Yes	Yes	Yes	Surface water	500 mL	OPFLP-04 standard method	QIAamp Viral RNA mini kit	Conventional RT-PCR			1032	18		No
2022-04-27 04:46:35	Jeannette Nina Magoudjou Pekam	286	A Human Rights Approach for Access to Clean Drinking Water: A Case Study.	Kanaaneh	1995	No	Case report
2022-04-27 04:54:21	Jeannette Nina Magoudjou Pekam	287	Epidemiological investigation of an outbreak of Acute Viral Hepatitis A and E in a semi-urban locality in Chandigarh, North Indian Union Territory, 2016-17.	Kankaria	2020	No	No data on HAV prevalence in water matrices
2022-04-27 09:10:58	Jeannette Nina Magoudjou Pekam	288	Hepatitis A virus contamination in the river and soil of Kitakyushu area in Japan.	Karasaki	2012	No	No data on HAV prevalence in water matrices
2022-04-27 09:28:10	Jeannette Nina Magoudjou Pekam	289	Outbreak investigation of acute viral hepatitis in Kangra valley, Himachal Pradesh, India, 2014-2015.	Katoch	2016	No	No data on HAV prevalence in water matrices
2022-05-04 11:26:43	Jean Thierry Ebogo Belobo	275	Immunomagnetic capture PCR for rapid concentration and detection of hepatitis A virus from environmental samples.	Jothikumar	1998	Yes		Cross-sectional	Non probabilistic	Consecutive sampling	Monocenter	Urban	Prospectively	United States of America; America; Northern America; High-income economies		Apr/1996-Dec/1996	No	No	No	Not applicable	Not applicable	No	Yes	Yes	No	Yes	Raw sewage	200mL	adsorption-elution method		Immunomagnetic capture PCR			18	2		No
2022-04-27 17:39:24	Jeannette Nina Magoudjou Pekam	292	Risk of communicable disease infection associated with wastewater irrigation in agricultural settlements.	Katzenelson	1976	No	No data on HAV prevalence in water matrices
2022-04-28 09:59:42	Jeannette Nina Magoudjou Pekam	293	Hepatitis E virus: A leading cause of waterborne viral hepatitis in Northwest Districts of Punjab, India.	Kaur	2017	No	No data on HAV prevalence in water matrices
2022-04-28 10:14:50	Jeannette Nina Magoudjou Pekam	294	Prevalent fecal contamination in drinking water resources and potential health risks in Swat, Pakistan.	Khan	2018	No	No data on HAV prevalence in water matrices
2022-04-28 10:20:52	Jeannette Nina Magoudjou Pekam	295	Environmental health indicators in New Zealand: Drinking water - A case study.	Khan	2007	No	No data on HAV prevalence in water matrices
2022-04-28 10:47:42	Jeannette Nina Magoudjou Pekam	296	HAV in fresh vegetables: a hidden health risk in district Mardan, Pakistan.	Khan	2014	No	No data on HAV prevalence in water matrices
2022-04-28 11:03:43	Jeannette Nina Magoudjou Pekam	297	Detection of enteroviruses and mammalian reoviruses in Korean environmental waters.	Kim	2006	No	No data on HAV prevalence in water matrices
2022-04-28 11:10:54	Jeannette Nina Magoudjou Pekam	298	Rapid and efficient extraction method for reverse transcription-PCR detection of hepatitis A and Norwalk-like viruses in shellfish.	Kingsley	2001	No	No data on HAV prevalence in water matrices
2022-04-28 11:14:32	Jeannette Nina Magoudjou Pekam	299	Persistence of hepatitis A virus in oysters.	Kingsley	2003	No	No data on HAV prevalence in water matrices
2022-05-04 12:40:55	Jean Thierry Ebogo Belobo	276	Duplex RT-PCR for simultaneous detection of hepatitis A and hepatitis E virus isolated from drinking water samples.	Jothikumar	2000	Yes		Cross-sectional	Non probabilistic	Consecutive sampling	Monocenter	Urban	Prospectively	India; South-East Asia; Southern Asia; Lower-middle income economies		NR	No	No	No	Not applicable	Not applicable	No	Yes	Yes	Unclear	Yes	Drinking water	20L	adsorption-elution method	Guanidinium isothiocyanate	Conventional RT-PCR		VP3, VP1	23	9		No
2022-05-04 13:11:25	Jean Thierry Ebogo Belobo	280	Occurrence of norovirus and other enteric viruses in untreated groundwaters of Korea.	Jung	2011	Yes		Cross-sectional	Non probabilistic	Consecutive sampling	Multicenter	Urban	Prospectively	South Korea; Western Pacific; Eastern Asia; High-income economies		Jul/2007-Nov/2007	No	No	No	Not applicable	Not applicable	No	Yes	Yes	No	Yes	Groundwater	500L	adsorption-elution method	QIAamp Viral RNA mini kit	Conventional RT-PCR			39	0		No
2022-05-04 13:48:59	Jean Thierry Ebogo Belobo	281	A 1-Year Study on the Detection of Human Enteric Viruses in New Caledonia.	Kaas	2016	Yes		Cross-sectional	Non probabilistic	Consecutive sampling	Monocenter	Urban	Prospectively	New Caledonia (France) ; Unclear; Oceania; High-income economies		Apr/2012-Mar/2013	No	No	No	Not applicable	Not applicable	No	Yes	Yes	Yes	Yes	Wastewater sample	500 mL	polyethylene glycol (PEG) flocculation	High Pure Viral Nucleic Acid Kit	Real-time RT-PCR			12	0		No
2022-04-29 03:43:38	Jeannette Nina Magoudjou Pekam	303	Current outbreak of hepatitis A in Bulgaria, 2006.	Kojouharova	2006	No	Review
2022-04-27 04:39:39	Jeannette Nina Magoudjou Pekam	285	Presence of enteric hepatitis viruses in the sewage and population of Greater Cairo.	Kamel	2011	Yes		Cross-sectional	Unclear/ Not reported	Unclear/ Not reported	Multicenter	Urban	Prospectively	Egypt; Eastern Mediterranean; Northern Africa; Lower-middle income economies		jul/2006-Aug/2007	No	No	Not applicable	Yes	Yes	Not applicable	Yes	Yes	Yes	Yes	Raw sewage, Treated sewage	2L	Sodium phosphate dibasic	NR	Conventional RT-PCR	4.85	VP3, VP1	76	11	Genotype I	No
2022-04-27 17:10:32	Jeannette Nina Magoudjou Pekam	290	Genomic copy concentrations of selected waterborne viruses in a slum environment in Kampala, Uganda.	Katukiza	2013	Yes		Cross-sectional	Probabilistic	Simple random sampling	Multicenter	Rural	Prospectively	Uganda; Africa; Eastern Africa; Low-income economies		Jan/2011-Feb/2011	No	No	Yes	Yes	Yes	No	Yes	Yes	No	Yes	Grey water	10L	Filtration, glass wool filtration	Guanidinium isothiocyanate	Real-time RT-PCR			11	3		No
2022-04-29 04:34:33	Jeannette Nina Magoudjou Pekam	306	Virological Quality of Irrigation Water in Leafy Green Vegetables and Berry Fruits Production Chains.	Kokkinos	2017	No	No data on HAV prevalence in water matrices
2022-04-29 04:47:39	Jeannette Nina Magoudjou Pekam	307	Molecular characterization of hepatitis a virus isolates from environmental and clinical samples in Greece.	Kokkinos	2010	No	No data on HAV prevalence in water matrices
2022-04-28 11:53:18	Jeannette Nina Magoudjou Pekam	300	Detection of poliovirus, hepatitis A virus and rotavirus from sewage and water samples.	Kittigul	2000	Yes		Cross-sectional	Unclear/ Not reported	Unclear/ Not reported	Multicenter	Rural	Prospectively	Thailand; South-East Asia; Southeastern Asia; Upper-middle-income economies		Feb/1998-Jun/1998	No	No	Not applicable	Yes	Yes	Not applicable	Yes	Yes	No	Yes	Surface water from canals	1L	Filtration	Guanidinium isothiocyanate	Real-time RT-PCR			20	3		No
2022-04-29 18:02:33	Jeannette Nina Magoudjou Pekam	309	Molecular detection of multiple viral targets in untreated urban sewage from Greece.	Kokkinos	2011	No	Duplicates
2022-04-29 18:18:12	Jeannette Nina Magoudjou Pekam	310	The presence of human enteric viruses in sewage and their removal by conventional sewage treatment methods.	Kollins	1966	No	Review
2022-04-29 18:24:29	Jeannette Nina Magoudjou Pekam	311	Administration of water-soluble vitamins in viral hepatitis A.	Komar	1992	No	No data on HAV prevalence in water matrices
2022-04-29 18:32:09	Jeannette Nina Magoudjou Pekam	312	Environmental persistence and transfer of enteric viruses.	Kotwal	2014	No	Review
2022-04-30 04:39:26	Jeannette Nina Magoudjou Pekam	313	A novel method for concentrating hepatitis A virus and caliciviruses from bottled water.	Kovac	2009	No	No data on HAV prevalence in water matrices
2022-04-30 05:08:03	Jeannette Nina Magoudjou Pekam	314	[Waterborne diseases outbreaks in the Czech Republic, 1995-2005].	Kozísek	2009	No	No data on HAV prevalence in water matrices
2022-04-30 05:43:28	Jeannette Nina Magoudjou Pekam	315	[Isolation of viruses from water using porous silica].	Krasil'nikov	1985	No	No data on HAV prevalence in water matrices
2022-04-30 05:49:02	Jeannette Nina Magoudjou Pekam	316	Quality assessment of drinking water in Prague in relation to the incidence of diarrhoeal diseases.	Kratochvil	1998	No	No data on HAV prevalence in water matrices
2022-04-30 05:54:56	Jeannette Nina Magoudjou Pekam	317	Water and sewage as transmission factors in viral hepatitis, demonstrated by practical examples.	Kretschmer	1972	No	Article not in English or in French
2022-04-30 17:22:35	Jeannette Nina Magoudjou Pekam	318	Detection of indigenous enteric viruses in raw sewage effluents of the city of Athens, Greece, during a two year survey.	Krikelis	1985	No	No data on HAV prevalence in water matrices
2022-04-30 17:25:53	Jeannette Nina Magoudjou Pekam	319	Recovery of viruses and bacteria in waters off Bondi beach: a pilot study.	Kueh	1989	No	No data on HAV prevalence in water matrices
2022-04-30 17:31:36	Jeannette Nina Magoudjou Pekam	320	Immunofluorescent detection and quantitation of hepatitis A virus in sewage treatment effluent and on agri-food surfaces using scanning confocal microscopy.	Kukavica-Ibrulj	2003	No	No data on HAV prevalence in water matrices
2022-04-30 17:36:48	Jeannette Nina Magoudjou Pekam	321	Hepatitis A outbreak associated with unsafe drinking water in a medical college student's hostel, New Delhi, India, 2014.	Kumar	2016	No	No data on HAV prevalence in water matrices
2022-04-30 17:46:29	Jeannette Nina Magoudjou Pekam	322	Viral Hepatitis Surveillance--India, 2011-2013.	Kumar	2015	No	Review
2022-05-01 11:38:13	Jeannette Nina Magoudjou Pekam	323	Food-Borne Viruses in Shellfish: Investigation on Norovirus and HAV Presence in Apulia (SE Italy).	La Bella	2017	No	No data on HAV prevalence in water matrices
2022-05-01 11:45:11	Jeannette Nina Magoudjou Pekam	324	Emerging and potentially emerging viruses in water environments.	La Rosa	2012	No	Review
2022-04-28 12:35:11	Jeannette Nina Magoudjou Pekam	301	Detection and characterization of hepatitis A virus in water samples in Thailand.	Kittigul	2006	Yes		Cross-sectional	Unclear/ Not reported	Unclear/ Not reported	Unclear/ Not reported	Unclear/Not reported	Prospectively	Thailand; South-East Asia; Southeastern Asia; Upper-middle-income economies		Aug/2001-Dec/2001	No	No	Not applicable	Yes	Yes	Not applicable	Yes	Yes	No	Yes	swamps	1L	Filtration	QIAamp Viral RNA mini kit	Real-time RT-PCR		VP3, VP1	40	6	Genotype I	Yes	Canals	1L	Filtration	QIAamp Viral RNA mini kit	Real-time RT-PCR			30	3
2022-04-28 13:00:16	Jeannette Nina Magoudjou Pekam	302	The detection of enteric viruses in selected urban and rural river water and sewage in Kenya, with special reference to rotaviruses.	Kiulia	2010	Yes		Cross-sectional	Unclear/ Not reported	Unclear/ Not reported	Monocenter	Urban	Prospectively	Kenya; Africa; Eastern Africa; Lower-middle income economies		May/2007-Feb/2008	No	No	Not applicable	Yes	Yes	Not applicable	Yes	Yes	No	Yes	Wastewater sample	1L	Polyethylene glycol precipitation	MagNA Pure LC Total Nucleic Acid Isolation kit	Nested PCR			10	8		No
2022-04-29 04:08:43	Jeannette Nina Magoudjou Pekam	304	Molecular typing of enteroviruses, adenoviruses, and hepatitis a viruses in untreated and treated sewage of a biological treatment plant in Greece.	Kokkinos	2010	Yes		Case control	Unclear/ Not reported	Unclear/ Not reported	Monocenter	Urban	Prospectively	Greece; Europe; Southern Europe; High-income economies		May/2007-Dec/2007	No	No	Not applicable	Yes	Yes	Not applicable	Yes	Yes	No	Yes	Sewage sample	100mL	Ultracentrifugation technique	QIAamp Viral RNA mini kit	Real-time RT-PCR			25	1		No
2022-04-29 04:24:15	Jeannette Nina Magoudjou Pekam	305	Assessment of the Virological Quality of Marine and Running Surface Waters in NW Greece: A Case Study.	Kokkinos	2018	Yes
2022-05-01 13:24:39	Jeannette Nina Magoudjou Pekam	329	Three-year study to assess human enteric viruses in shellfish.	Le Guyader	2000	No	No data on HAV prevalence in water matrices
2022-05-01 13:28:34	Jeannette Nina Magoudjou Pekam	330	Use of RT seminested PCR to assess viral contamination in caribbean rivers (martinique).	Le Guyader	1995	No	No data on HAV prevalence in water matrices
2022-05-01 13:33:01	Jeannette Nina Magoudjou Pekam	331	Persistence of murine norovirus, bovine rotavirus, and hepatitis A virus on stainless steel surfaces, in spring water, and on blueberries.	Leblanc	2019	No	No data on HAV prevalence in water matrices
2022-04-29 17:47:34	Jeannette Nina Magoudjou Pekam	308	Environmental surveillance. An additional/alternative approach for virological surveillance in Greece?	Kokkinos	2011	Yes		Cross-sectional	Unclear/ Not reported	Unclear/ Not reported	Monocenter	Urban	Prospectively	Greece; Europe; Southern Europe; High-income economies		Nov/2007-Jul/2009	No	No	Not applicable	Yes	Yes	Not applicable	Yes	Yes	Yes	Yes	Sewage effluent		Ultracentrifugation technique	QIAamp Viral RNA mini kit	Real-time RT-PCR			48	4	Genotype I, Genotype IA	No
2022-05-01 12:29:32	Jeannette Nina Magoudjou Pekam	325	Surveillance of hepatitis A virus in urban sewages and comparison with cases notified in the course of an outbreak, Italy 2013.	La Rosa	2014	Yes		Cross-sectional	Non probabilistic	Convenience sampling	Multicenter	Urban	Prospectively	Italy; Europe; Southern Europe; High-income economies		Jul/2012-Sep/2013	No	No	No	Yes	Yes	No	Yes	Yes	Yes	Yes	Sewage sample	80mL	NR	NucliSENS easyMAG	Nested RT-PCR		VP1, 2A	157	38	Genotype I, IB	No
2022-04-25 14:01:07	Josiane Kenfack	334	Development of a new cell culture-based method and optimized protocol for the detection of enteric viruses.	Lee	2013	No	No data on HAV prevalence in water matrices
2022-04-25 14:07:40	Josiane Kenfack	335	Use of silica as a carrier to recover and prepare waterborne enteric viruses for detection by RT-PCR.	Leisinger	2013	No	No data on HAV prevalence in water matrices
2022-04-25 14:10:07	Josiane Kenfack	336	Concentration of hepatitis A and B virus antigens using water-soluble polymers.	Leshchuk	1996	No	No data on HAV prevalence in water matrices
2022-04-25 14:20:39	Josiane Kenfack	337	Polyethylene glycol precipitation for recovery of pathogenic viruses, including hepatitis A virus and human rotavirus, from oyster, water, and sediment samples.	Lewis	1988	No	No data on HAV prevalence in water matrices
2022-04-25 14:26:04	Josiane Kenfack	338	A new and simple method for concentration of enteric viruses from water.	Li	1998	No	No data on HAV prevalence in water matrices
2022-04-25 14:28:56	Josiane Kenfack	339	Detection of enteroviruses and hepatitis a virus in water by consensus primer multiplex RT-PCR.	Li	2009	No	No data on HAV prevalence in water matrices
2022-04-25 14:34:05	Josiane Kenfack	340	Concentration of hepatitis A virus from mimicked water samples by membrane filtration method.	Lin	2019	No	Article not in English or in French
2022-04-25 14:36:01	Josiane Kenfack	341	An epidemic of water-borne hepatitis A.	Linglof	191	No	Article not in English or in French
2022-04-25 15:03:10	Josiane Kenfack	342	Analysis of multiple enteric viral targets as sewage markers in coral reefs.	Lipp	2007	No	Not possible to extract data on HAV prevalence	Unclear/ Not reported	Probabilistic	Unclear/ Not reported	Multicenter	Unclear/Not reported	Prospectively	United States of America; America; Northern America; High-income economies		2001-2003	No	No	Unclear	Yes	No	No	Yes	Yes	Yes	Yes	Water and coral mucus s	50ml	membrane based adsorption–elution technique	Qiagen RNeasy Mini Spin Kit	RT PCR			9	0		No
2022-04-25 17:48:30	Josiane Kenfack	344	Occurrence of enteric viruses in reclaimed and surface irrigation water: relationship with microbiological and physicochemical indicators.	López-Gálvez	2016	No	Not possible to extract data on HAV prevalence	Unclear/ Not reported	Probabilistic	Unclear/ Not reported	Multicenter	Unclear/Not reported	Prospectively	Spain; Europe; Southern Europe; High-income economies		Dec/2014- Mar/2015	Unclear	Unclear	Unclear	Yes	No	No	Yes	Yes	No	Yes	Irrigation water- surface water	2L			RT PCR			108	9		Yes	IRRIGATE WATER- Secondary water	2L			RT PCR			108	6		TERTIARY WATER	2L
2022-04-25 17:51:12	Josiane Kenfack	345	Microbiological quality of drinking water and using water of a Chao Phya River community, Bangkok.	Luksamijarulkul	1994	No	No data on HAV prevalence in water matrices
2022-04-25 17:52:41	Josiane Kenfack	346	Waterborne virus diseases.	Lund	1982	No	No data on HAV prevalence in water matrices
2022-04-25 17:54:38	Josiane Kenfack	347	[Indications of pathogenic viruses in water of Lake Baikal and its tributaries].	Maksimov	2003	No	Article not in English or in French
2022-04-25 17:55:45	Josiane Kenfack	348	[Viral pollution of drinking water in industrial towns of Eastern Siberia].	Mamontova	2000	No	No data on HAV prevalence in water matrices
2022-04-25 18:04:39	Josiane Kenfack	349	A simple field test for the detection of faecal pollution in drinking water.	Manja	1982	No	No data on HAV prevalence in water matrices
2022-04-25 18:06:07	Josiane Kenfack	350	Evidence for Hepatitis A virus endemic circulation in Israel despite universal toddlers' vaccination since 1999 and low clinical incidence in all age groups.	Manor	2017	No	No data on HAV prevalence in water matrices
2022-04-25 18:08:21	Josiane Kenfack	351	Genotyping of hepatitis A virus detected in bivalve shellfish in Galicia (NW Spain).	Manso	2010	No	No data on HAV prevalence in water matrices
2022-04-25 18:09:29	Josiane Kenfack	352	Detección del virus de la Hepatitis A en dos muestras de agua del Río Sechura, usando transcriptasa-reversa PCR en tiempo real.	Marcos	2014	No	Article not in English or in French
2022-04-25 18:22:06	Josiane Kenfack	353	Viruses in the environment - presence and diversity of bacteriophage and enteric virus populations in the Umhlangane River, Durban, South Africa.	Marie	2017	No	No data on HAV prevalence in water matrices
2022-04-25 18:30:21	Josiane Kenfack	354	Acute toxic hepatitis due to drinking water.	Martínez Amate	2010	No	No data on HAV prevalence in water matrices
2022-05-01 12:57:26	Jeannette Nina Magoudjou Pekam	326	Hepatitis A Virus Strains Circulating in the Campania Region (2015–2018) Assessed through Bivalve Biomonitoring and Environmental Surveillance.	La Rosa	2021	Yes		Cross-sectional	Unclear/ Not reported	Unclear/ Not reported	Multicenter	Unclear/Not reported	Prospectively	Italy; Europe; Southern Europe; High-income economies		2015-2018	No	No	Not applicable	Yes	Yes	No	Yes	Yes	Yes	Yes	Sewage sample	500mL	Polyethylene glycol precipitation	NucliSens miniMAG	RT- nestedPCR			71	20	Genotype I, IA, IB	No
2022-04-25 19:05:16	Josiane Kenfack	356	Human health risk assessment for the occurrence of enteric viruses in drinking water from wells: Role of flood runoff injections.	Masciopinto	2019	No	No data on HAV prevalence in water matrices
2022-04-25 19:10:36	Josiane Kenfack	357	Analytical solution for the modeling of the natural time-dependent reduction of waterborne viruses injected into fractured aquifers.	Masciopinto	2011	No	No data on HAV prevalence in water matrices
2022-04-25 19:13:35	Josiane Kenfack	358	Assessment of airborne virus contamination in wastewater treatment plants.	Masclaux	2014	No	No data on HAV prevalence in water matrices
2022-04-25 19:15:19	Josiane Kenfack	359	Viruses in drinking water - an underestimated danger?	Mayr	1980	No	Article not in English or in French
2022-04-25 20:01:42	Josiane Kenfack	360	Identification of multiple potential viral diseases in a large urban center using wastewater surveillance.	McCall	2020	No	Not possible to extract data on HAV prevalence
2022-04-25 20:41:10	Josiane Kenfack	361	Assessment of enteric viruses during a hepatitis outbreak in Detroit MI using wastewater surveillance and metagenomic analysis.	McCall	2021	No	No data on HAV prevalence in water matrices
2022-04-25 20:43:47	Josiane Kenfack	363	Viruses in surface and drinking waters.	Meinick	1982	No	Review
2022-04-25 20:45:40	Josiane Kenfack	364	Viruses in water.	Melnick	1978	No	No data on HAV prevalence in water matrices
2022-04-25 20:47:55	Josiane Kenfack	365	Endemic circulation of hepatitis a virus in israel in spite of universal vaccination program evidenced by clinical and environmental surveillance.	Mendelson	2015	No	No data on HAV prevalence in water matrices
2022-04-25 20:49:50	Josiane Kenfack	366	Development of an extraction and concentration method for the detection of hepatitis A virus in different samples.	Meng	2008	No	No data on HAV prevalence in water matrices
2022-04-25 20:51:46	Josiane Kenfack	367	Detection of hepatitis A virus in estuarine samples by gene probe assay.	Metcalf	1988	No	Review
2022-04-25 20:56:53	Josiane Kenfack	368	Environmental virology: From detection of virus in sewage and water by isolation to identification by molecular biology - A trip of over 50 years.	Metcalf	1995	No	Review
2022-04-25 20:59:36	Josiane Kenfack	369	The occurrence of human viruses and coliphage in marine waters and shellfish.	Metcalf	1972	No	No data on HAV prevalence in water matrices
2022-05-01 13:04:24	Jeannette Nina Magoudjou Pekam	327	The impact of anthropogenic pressure on the virological quality of water from the Tiber River, Italy.	La Rosa	2017	Yes
2022-04-25 21:16:32	Josiane Kenfack	371	Persistence of inoculated hepatitis A virus in mixed human and animal wastes.	Ming Yi	1995	No	No data on HAV prevalence in water matrices
2022-04-25 21:18:29	Josiane Kenfack	372	Health-related Microbial Quality of Drinking Water in Kangavar, Western Iran.	Mirzaei	2016	No	No data on HAV prevalence in water matrices
2022-04-25 21:24:21	Josiane Kenfack	373	Survival of somatic and F-RNA coliphages in treated wastewater effluents and their impact on viral quality of the receiving water bodies in the Eastern Cape Province-South Africa.	Momba	2009	No	No data on HAV prevalence in water matrices
2022-04-25 21:31:37	Josiane Kenfack	374	Detection of hepatitis A virus in clinical and environmental samples by immunomagnetic separation and PCR.	Monceyron	1994	No	No data on HAV prevalence in water matrices
2022-04-25 21:35:34	Josiane Kenfack	376	Wastewater workers and hepatitis A virus infection.	Montuori	2009	No	No data on HAV prevalence in water matrices
2022-04-25 21:41:51	Josiane Kenfack	377	Surveillance for waterborne disease outbreaks--United States, 1991-1992.	Moore	1993	No	No data on HAV prevalence in water matrices
2022-04-25 21:48:54	Josiane Kenfack	378	Microbial quality of wastewater: Detection of hepatitis A virus by reverse transcriptase-polymerase chain reaction.	Morace	2002	No	No data on HAV prevalence in water matrices
2022-05-01 13:22:14	Jeannette Nina Magoudjou Pekam	328	Presence of Human and Animal Viruses in Surface Waters in Vojvodina Province of Serbia.	Lazić	2015	Yes		Cross-sectional	Probabilistic	Simple random sampling	Multicenter	Urban	Prospectively	Serbia; Europe; Southern Europe; Upper-middle-income economies		Jul/2013-Dec/2013	No	No	Yes	Yes	Yes	Not applicable	Yes	Yes	No	Not applicable	Sewage effluent		Filtration, Glass Wool	NucliSens miniMAG	RT-qPCR			6	0		No
2022-05-09 13:13:18	Donatien Serge Mbaga	380	Phylogenetic analysis indicates human origin of rotavirus and hepatitis A virus strains found in the drinking water of western Colombia.	Moreno	2009	No	Article not in English or in French
2022-04-25 13:11:23	Josiane Kenfack	332	Molecular detection of human enteric viruses in urban rivers in Korea.	Lee	2008	Yes		Unclear/ Not reported	Probabilistic	Unclear/ Not reported	Multicenter	Urban	Prospectively	South Korea; Western Pacific; Eastern Asia; High-income economies		May/2002-Mar/2003	Unclear	Unclear	Unclear	Yes	No	No	Yes	Yes	Yes	Yes	River water		standard methods	QIAamp Viral RNA mini kit	RT nested PCR		3A	58	2		No
2022-05-09 13:20:48	Donatien Serge Mbaga	382	An outbreAk of hepatitis a apparently associated with use of contaminated water.	Morgado	1982	No	Full text or abstract not found
2022-05-09 16:44:52	Donatien Serge Mbaga	383	Infectious hepatitis; report of an outbreak probably caused by drinking water.	Mosley	1937	No	No data on HAV prevalence in water matrices
2022-05-09 17:04:28	Donatien Serge Mbaga	385	Hepatitis A virus outbreak in a compound in Tshwane district, Gauteng, South Africa: October 2014-March 2015.	Mphaka	2016	No	No data on HAV prevalence in water matrices
2022-05-09 17:13:51	Donatien Serge Mbaga	386	Epidemiology of hepatitis a and Hepatitis E based on laboratory surveillance data-India, 2014-2017.	Murhekar	2018	No	No data on HAV prevalence in water matrices
2022-05-09 17:21:07	Donatien Serge Mbaga	387	Enteric virus detection in Adriatic seawater by cell culture, polymerase chain reaction and polyacrylamide gel electrophoresis.	Muscillo	1997	No	No data on HAV prevalence in water matrices
2022-05-09 17:24:34	Donatien Serge Mbaga	388	Enteric viruses in inlet and outlet samples from sewage treatment plants.	Myrmel	2006	No	No data on HAV prevalence in water matrices
2022-05-09 14:04:47	Donatien Serge Mbaga	390	Detection of hepatitis E virus in greater Cairo two wastewater treatment plants and its prevalence among workers of these plants.	El Esnawy	1998	No	Full text or abstract not found
2022-05-09 17:30:47	Donatien Serge Mbaga	391	Evolutionary pattern of 5'-UTR of enteroviruses and primer update for the detection of enteroviral RNA in environmental samples.	Nabil-Ben-Salem	2012	No	No data on HAV prevalence in water matrices
2022-05-09 17:32:59	Donatien Serge Mbaga	392	Survival and Inactivation by Advanced Oxidative Process of Foodborne Viruses in Model Low-Moisture Foods.	Nasheri	2021	No	No data on HAV prevalence in water matrices
2022-04-25 13:46:48	Josiane Kenfack	333	Incidence and molecular characterization of hepatitis A viruses in Korean surface water between 2007 and 2010.	Lee	2014	Yes		Unclear/ Not reported	Probabilistic	Unclear/ Not reported	Multicenter	Unclear/Not reported	Prospectively	South Korea; Western Pacific; Eastern Asia; High-income economies		Feb/2007-Sep/2010	Unclear	Unclear	Unclear	Yes	No	No	Yes	Yes	Yes	Yes	source water	200L	USEPA guidelines	QIAamp Viral RNA mini kit	Unclear/Not reported		VP3-VP1	265	9	GenotypeIA, Genotype IB	No
2022-05-09 17:52:20	Donatien Serge Mbaga	394	Prevalence and fate of hepatitis A virus in water.	Nasser	1994	No	Review
2022-05-09 17:54:19	Donatien Serge Mbaga	395	Detection of human rotaviruses in fresh and estuarine waters by dot-blot hybridization.	Nasser	1991	No	No data on HAV prevalence in water matrices
		615	Hydrologic, land cover, and seasonal patterns of waterborne pathogens in Great Lakes tributaries.	Lenaker	2017	Yes
2022-05-09 09:48:39	Sebastien Kenmoe	397	Quantitative assessment of the inactivation of pathogenic and indicator viruses in natural water sources.	Nasser	1999	No	No data on HAV prevalence in water matrices
2022-05-09 09:53:23	Sebastien Kenmoe	398	Comparative survival of E. coli, F+bacteriophages, HAV and poliovirus 1 in wastewater and groundwater.	Nasser	1993	No	No data on HAV prevalence in water matrices
2022-05-09 09:54:25	Sebastien Kenmoe	399	Use of natural sorbents for isolation of enteroviruses and hepatitis A virus from water bodies.	Nechiporenko	1986	No	Article not in English or in French
2022-05-09 09:56:04	Sebastien Kenmoe	400	WASTE WATERS AS THE RESERVOIR OF INTESTINAL ENTERIC VIRAL INFECTIONS.	Nedachin	2015	No	Article not in English or in French
2022-05-09 09:57:02	Sebastien Kenmoe	401	Effect of various chlorine doses on inactivation of hepatitis A virus in water.	Nedachin	1993	No	Article not in English or in French
2022-05-09 09:57:40	Sebastien Kenmoe	402	[Rapid method for detecting hepatitis A virus antigen in the water].	Nedachin	1993	No	Article not in English or in French
2022-04-25 19:03:10	Josiane Kenfack	355	Enteric Viruses in Surface Waters from Argentina: Molecular and Viable-Virus Detection.	Masachessi	2018	Yes		Unclear/ Not reported	Probabilistic	Unclear/ Not reported	Multicenter	Unclear/Not reported	Prospectively	Argentina; America; South America; Upper-middle-income economies		Jan/2012- Oct/2015	No	No	Unclear	Yes	No	No	Yes	Yes	No	Yes	beaches, the body of the dam	1,5l	the polyethylene glycol (PEG) precipitation method,	QIAamp Viral RNA mini kit	Unclear/Not reported		5'-UTR	48	1	GenotypeIA	No
2022-05-09 10:13:42	Sebastien Kenmoe	405	Metagenomic sequencing for surveillance of food- and waterborne viral diseases.	Nieuwenhuijse	2017	No	Review
2022-05-09 10:17:43	Sebastien Kenmoe	406	A water-borne outbreak of infectious hepatitis.	Nikiforov	1974	No	Article not in English or in French
2022-05-09 10:19:27	Sebastien Kenmoe	407	Hepatitis A associated with consumption of frozen strawberries--Michigan, March 1997.	Centers for Disease Control and Prevention	1997	No	No data on HAV prevalence in water matrices
2022-05-09 10:20:42	Sebastien Kenmoe	408	Establishment of a viral hepatitis surveillance system--Pakistan, 2009-2011.	Centers for Disease Control and Prevention	2011	No	No data on HAV prevalence in water matrices
2022-05-09 10:22:48	Sebastien Kenmoe	409	Molecular epidemiology of an outbreak of hepatitis A in Italy.	Normann	1995	No	No data on HAV prevalence in water matrices
2022-05-09 10:23:21	Sebastien Kenmoe	410	An epidemic of viral hepatitis A after consumption of mussels from polluted seawater.	Novaković	1983	No	Article not in English or in French
2022-04-25 21:15:25	Josiane Kenfack	370	Assessment of water quality in a border region between the Atlantic forest and an urbanised area in Rio de Janeiro, Brazil.	Miagostovich	2014	Yes		Unclear/ Not reported	Probabilistic	Unclear/ Not reported	Multicenter	Unclear/Not reported	Prospectively	Brazil; America; South America; Upper-middle-income economies		Jun/2008-May/2009	Unclear	Unclear	Unclear	Yes	No	No	Yes	Yes	Yes	Yes	River water	2L	adsorption-elution method	QIAamp Viral RNA mini kit	qPCR		5'NCR	108	0		No
2022-05-10 11:01:03	Sebastien Kenmoe	379	Detection of hepatitis A virus in concentrated river water by polymerase chain reaction.	Morace	1993	Yes		Cross-sectional	Non probabilistic	Consecutive sampling	Monocenter	Unclear/Not reported	Prospectively	Italy; Europe; Southern Europe; High-income economies		nr	No	Yes	Unclear	Not applicable	Yes	Unclear	Yes	Yes	Unclear	Yes	River water				Conventional RT-PCR			13	8		No
2022-05-09 10:44:22	Sebastien Kenmoe	413	Development of RT-PCR method to detect various human enteric viruses.	Oh	2009	No	Article not in English or in French
2022-05-09 10:45:54	Sebastien Kenmoe	414	Inadequately treated wastewater as a source of human enteric viruses in the environment.	Okoh	2010	No	Review
2022-05-09 10:47:41	Sebastien Kenmoe	415	Early SARS-CoV-2 outbreak detection by sewage-based epidemiology.	Orive	2020	No	Review
2022-05-09 10:48:27	Sebastien Kenmoe	416	Dynamics of viral hepatitis A morbidity in Minsk.	Orlova	2005	No	Article not in English or in French
2022-05-09 10:51:24	Sebastien Kenmoe	417	Microfluidic PCR amplification and MiSeq amplicon sequencing techniques for high-throughput detection and genotyping of human pathogenic RNA viruses in human feces, sewage, and oysters.	Oshiki	2018	No	Sample size < or = 10 participants
2022-05-09 16:42:03	Donatien Serge Mbaga	381	Microbiological and physicochemical analysis of the coastal waters of southern Brazil.	Moresco	2012	Yes		Cross-sectional	Non probabilistic	Consecutive sampling	Multicenter	Urban	Prospectively	Brazil; America; South America; Upper-middle-income economies		Aug/2009-Jul/2010	No	Yes	No	Yes	Yes	No	Yes	Yes	Yes	Yes	Seawater	200 uL	flocculation method	QIAmp MinElute Virus Spin Kit	Real-time RT-PCR			132	68		No
2022-05-09 17:49:23	Donatien Serge Mbaga	393	Detection and Phylogenetic Analysis of Hepatitis A Virus in the Wastewater Treatment Plant of Ekbatan Town in Tehran, Iran.	Nasiri	2021	Yes		Cross-sectional	Non probabilistic	Consecutive sampling	Multicenter	Urban	Prospectively	Iran; Eastern Mediterranean; Southern Asia; Upper-middle-income economies		2019	No	Yes	No	Yes	No	No	Yes	Yes	Yes	Yes	Wastewater sample			FavorPrep™ Total RNA Mini Kit	Real-time RT-PCR		VP3/VP1	18	15	Genotype I	No
2022-05-09 18:13:42	Donatien Serge Mbaga	396	An A-ELISA to detect hepatitis A virus in estuarine samples.	Nasser	1987	Yes		Cross-sectional	Non probabilistic	Consecutive sampling	Monocenter	Urban	Prospectively	United States of America; America; Northern America; High-income economies		Apr/1986-Oct/1986	No	Yes	No	Yes	Unclear	No	Yes	Yes	No	Yes	Seawater				ELISA			20	3		Yes	Seawater				solid-phase radioimmunoassay			20	1
2022-05-09 11:31:15	Sebastien Kenmoe	421	Tirane, Albania: Survey on drinking water quality and facilities.	Palombi	2001	No	No data on HAV prevalence in water matrices
2022-05-09 11:32:55	Sebastien Kenmoe	422	High-throughput screening assay for the environmental water samples using cellular response profiles.	Pan	2015	No	No data on HAV prevalence in water matrices
2022-05-09 11:34:34	Sebastien Kenmoe	423	Isolation of hepatitis A virus from polluted river water on FRP/3 cells.	Pana	1987	No	Sample size < or = 10 participants
2022-05-09 11:36:19	Sebastien Kenmoe	424	Human enteric viruses in groundwater.	Park	2010	No	No data on HAV prevalence in water matrices
2022-05-09 11:39:39	Sebastien Kenmoe	425	Development of homologous viral internal controls for use in RT-PCR assays of waterborne enteric viruses.	Parshionikar	2004	No	No data on HAV prevalence in water matrices
2022-04-27 09:58:11	Raoul Kenfack Momo	426	Development of homologous viral internal controls for use in RT-PCR assays of waterborne enteric viruses.	Parshionikar	2004	No	No data on HAV prevalence in water matrices
2022-04-27 10:22:41	Raoul Kenfack Momo	427	Hepatitis A virus and poliovirus 1 inactivation in estuarine water.	Patti	1987	No	No data on HAV prevalence in water matrices	Cross-sectional	Non probabilistic	Consecutive sampling	Monocenter	Urban	Prospectively	Italy; Europe; Southern Europe; High-income economies		Jan/2014-Dec/2019	No	No	No	Yes	Yes	No	Yes	Yes	Yes	Yes	Drinking water				One Step RT‑PCR			2727	0		No
2022-04-27 10:27:49	Raoul Kenfack Momo	428	Detection of Hepatitis A Virus and Norovirus in Different Food Categories: A 6-Year Survey in Italy.	Pavoni	2022	No	No data on HAV prevalence in water matrices
2022-05-08 20:10:52	Raoul Kenfack Momo	429	An apparently water-borne outbreak of infectious hepatitis.	Peczenik	1956	No	No data on HAV prevalence in water matrices
2022-05-09 10:08:38	Sebastien Kenmoe	403	Detection and characterization of enteric viruses in flood water from the 2011 thai flood.	Ngaosuwankul	2013	Yes		Cross-sectional	Non probabilistic	Consecutive sampling	Multicenter	Unclear/Not reported	Prospectively	Thailand; South-East Asia; Southeastern Asia; Upper-middle-income economies		2011	No	Yes	No	Not applicable	Yes	No	Yes	Yes	Unclear	Yes	Flood water samples	400 - 1000 mL	Polyethylene glycol precipitation	PureLink ,Viral TM RNA/DNA mini kit	Conventional RT-PCR		VP3, VP1	100	75	Genotype I, 5	No
2022-05-09 10:26:50	Sebastien Kenmoe	411	Viruses in drinking water: HAV and enteroviruses.	Numanović	2004	Yes		Cross-sectional	Non probabilistic	Consecutive sampling	Monocenter	Unclear/Not reported	Prospectively	Bosnia and Herzegovina; Europe; Southern Europe; Upper-middle-income economies		nr	No	Yes	Unclear	Not applicable	Yes	Unclear	Yes	Yes	Unclear	Yes	Drinking water				Conventional RT-PCR			84	0		No
2022-04-27 10:58:41	Raoul Kenfack Momo	432	Use of a robotic RNA purification protocol based on the NucliSens® easyMAG™ for real-time RT-PCR detection of hepatitis A virus in bottled water.	Perelle	2009	No	No data on HAV prevalence in water matrices
2022-04-27 11:01:45	Raoul Kenfack Momo	433	Concentration of enteric viruses from tap water using an anion exchange resin-based method.	Pérez-Méndez	2014	No	No data on HAV prevalence in water matrices
2022-05-09 10:41:27	Sebastien Kenmoe	412	Viral diversity and abundance in polluted waters in Kampala, Uganda.	O'Brien	2017	Yes		Cross-sectional	Non probabilistic	Consecutive sampling	Multicenter	Unclear/Not reported	Prospectively	Uganda; Africa; Eastern Africa; Low-income economies		2016	No	Yes	No	Not applicable	Yes	No	Yes	Yes	Unclear	Yes	Sewage effluent			QIAamp Viral RNA mini kit	Real-time RT-PCR			12	6		Yes	Sewage influent			QIAamp Viral RNA mini kit	Real-time RT-PCR			12	4
2022-04-27 06:55:15	Raoul Kenfack Momo	437	Demonstration of hepatitis A virus (HAV) in sewage by immune electron microscopy.	Pietri	1988	No	Full text or abstract not found
2022-04-27 11:48:49	Raoul Kenfack Momo	438	Hepatitis A virus levels in shellfish exposed in a natural marine environment to the effluent from a treated sewage outfall.	Pietri	1988	No	Not possible to extract data on HAV prevalence
2022-04-27 07:09:35	Raoul Kenfack Momo	439	Detection of hepatitis A virus in experimentally contaminated seawater using a radio-immunological test: Sensitivity of the method.	Pietri	1987	No	No data on HAV prevalence in water matrices
2022-05-09 10:59:46	Sebastien Kenmoe	418	Incidence of human adenoviruses and Hepatitis A virus in the final effluent of selected wastewater treatment plants in Eastern Cape Province, South Africa.	Osuolale	2015	Yes		Cross-sectional	Non probabilistic	Consecutive sampling	Multicenter	Unclear/Not reported	Prospectively	South Africa; Africa; Southern Africa; Upper-middle-income economies		Sep/2012-Aug/2013	No	Yes	No	Not applicable	Yes	No	Yes	Yes	Yes	Yes	Sewage effluent	1250 mL	Adsorption–elution method	Quick-gDNA™ Mini Prep and a Zymo Viral RNA Extraction Kit	Real-time RT-PCR			70	0		No
2022-04-29 16:43:37	Raoul Kenfack Momo	441	INTERMEDIATE ENDEMICITY OF HEPATITIS A VIRUS INFECTION IN RURAL SETTLEMENT PROJECTS OF SOUTHWEST GOIÁS, BRAZIL.	Pinheiro	2015	No	No data on HAV prevalence in water matrices
2022-05-09 11:16:48	Sebastien Kenmoe	419	Efficiency of hepatitis A virus removal in six sewage treatment plants from central Tunisia.	Ouardani	2015	Yes		Cross-sectional	Non probabilistic	Consecutive sampling	Multicenter	Urban	Prospectively	Tunisia; Eastern Mediterranean; Northern Africa; Lower-middle income economies		Dec/2009-Dec/2010	No	Yes	No	Not applicable	Yes	No	Yes	Yes	Yes	Yes	Sewage influent		Adsorption-elution method	NucleoSpin RNA virus kit	Real-time RT-PCR	4.29 × 103 (copies/mL)	VP3, VP1	162	92	Genotype I	Yes	Sewage effluent				Real-time RT-PCR	1.56 × 103 (copies/mL)		163	37	Genotype I
2022-05-06 10:55:38	Raoul Kenfack Momo	443	Hepatitis A Virus Disinfection in Water by Solar Photo–Fenton Systems.	Polo	2018	No	No data on HAV prevalence in water matrices
2022-04-27 07:31:42	Raoul Kenfack Momo	444	Monitoring and modeling the microbiological quality of water and shellfish.	Pommepuy	2011	No	Review
2022-05-06 10:57:11	Raoul Kenfack Momo	445	Epidemiological and virological characterization of a large community-wide outbreak of hepatitis A in southern Italy.	Pontrelli	2008	No	No data on HAV prevalence in water matrices
2022-04-27 07:38:01	Raoul Kenfack Momo	446	Outbreak of hepatitis A in a college traced to contaminated water reservoir in cafeteria.	Poonawagul	1995	No	No data on HAV prevalence in water matrices
2022-05-09 11:29:43	Sebastien Kenmoe	420	Detection and Molecular Characterization of Hepatitis A Virus from Tunisian Wastewater Treatment Plants with Different Secondary Treatments.	Ouardani	2016	Yes		Cross-sectional	Non probabilistic	Consecutive sampling	Multicenter	Unclear/Not reported	Prospectively	Tunisia; Eastern Mediterranean; Northern Africa; Lower-middle income economies		Dec/2009-Dec/2010	No	Yes	No	Not applicable	Yes	No	Yes	Yes	Yes	Yes	Sewage influent		Adsorption-elution method	NucleoSpin RNA virus kit	Conventional RT-PCR, Real-time RT-PCR	1.7 x 103 (GC/ml)	5'-UTR, VP3, VP1	136	91	Genotype I, 130 IA and 11 IB	Yes	Sewage effluent				Real-time RT-PCR	5.5 x 10 2 (GC/ml)	5'-UTR	135	55	Genotype I, IA and IB
2022-05-06 11:06:19	Raoul Kenfack Momo	448	The efficiency of concentration methods used to detect enteric viruses in anaerobically digested sludge.	Prado	2013	No	No data on HAV prevalence in water matrices
2022-04-27 10:41:05	Raoul Kenfack Momo	430	Presence of enteric viruses in water samples for consumption in Colombia: Challenges for supply systems.	Peláez	2016	Yes		Cross-sectional	Non probabilistic	Consecutive sampling	Monocenter	Urban	Retrospectively	Colombia; America; South America; Upper-middle-income economies		2008-2014	No	No	No	Yes	Yes	No	Yes	Yes	Yes	Yes	Water samples				Conventional RT-PCR			288	77		No
2022-05-06 12:51:57	Raoul Kenfack Momo	451	Detection of enteric viruses in activated sludge by feasible concentration methods.	Prado	2014	No	No data on HAV prevalence in water matrices
2022-05-06 12:54:05	Raoul Kenfack Momo	452	The efficiency of concentration methods used to detect enteric viruses in anaerobically digested sludge.	Prado	2013	No	No data on HAV prevalence in water matrices
2022-04-27 10:55:23	Raoul Kenfack Momo	431	Molecular Characterization and Phylogenetic Analysis of Enteroviruses and Hepatitis A Viruses in Sewage Samples, Northern Italy, 2016.	Pellegrinelli	2019	Yes		Cross-sectional	Non probabilistic	Consecutive sampling	Monocenter	Urban	Prospectively	Italy; Europe; Southern Europe; High-income economies		2016	No	No	No	Yes	Yes	No	Yes	Yes	No	Yes	Wastewater sample	500 ml	polyethylene-glycol and dextran (PEG-DeX) separation method p		RT-nested PCR assays		5'-UTR	33	5	Genotype I	No
2022-04-27 11:10:04	Raoul Kenfack Momo	434	Presence and environmental circulation of enteric viruses in three different wastewater treatment plants.	Petrinca	2009	Yes
2022-05-06 14:18:14	Raoul Kenfack Momo	456	Detection of human hepatitis A virus in environmental water by an antigen-capture polymerase chain reaction method.	Prevot	1993	No	No data on HAV prevalence in water matrices
2022-05-06 14:32:58	Raoul Kenfack Momo	457	Tracking enteric viruses in green vegetables from central Argentina: potential association with viral contamination of irrigation waters.	Prez	2018	No	No data on HAV prevalence in water matrices
2022-04-27 08:15:48	Raoul Kenfack Momo	458	Virus infections and their significance in water hygiene.	Primavesi	1963	No	Article not in English or in French
		617	Immune electron microscopy in the detection of viruses other than enteroviruses on cell culture in untreated sewage.	Pietri	1988	Yes
2022-05-06 14:37:20	Raoul Kenfack Momo	460	Removal of phages and viral pathogens in a full-scale MBR: Implications for wastewater reuse and potable water.	Purnell	2016	No	No data on HAV prevalence in water matrices
2022-05-06 15:03:52	Raoul Kenfack Momo	461	Detection of human enteric viruses from shellfish, vegetable and water samples collected in Sicily.	Purpari	2018	No	Duplicates	Cross-sectional	Non probabilistic	Consecutive sampling	Monocenter	Urban	Prospectively	Italy; Europe; Southern Europe; High-income economies		2012-2017	No	No	No	Yes	Yes	No	Yes	Yes	Yes	Yes	Water samples		Filtration	NucliSENS miniMAG extraction	nested (RT) PCR		5'-UTR	23	0		No
2022-04-29 16:40:28	Raoul Kenfack Momo	440	Genetic analysis of hepatitis A virus strains recovered from the environment and from patients with acute hepatitis.	Pina	2001	Yes		Cross-sectional	Non probabilistic	Consecutive sampling	Monocenter	Urban	Prospectively	Spain; Europe; Southern Europe; High-income economies		1994-2000	No	No	No	Yes	Yes	No	Yes	Yes	Yes	Yes	Sewage sample	500 ml	Filtration	Guanidinium isothiocyanate	nested RT–PCR		5'-UTR	54	31	Genotype I, Genotype III	Yes	River water	1000 ml	Ultracentrifugation technique	Guanidinium isothiocyanate	nested RT–PCR u		5'-UTR	66	24
2022-05-09 11:49:55	Sebastien Kenmoe	463	Detection of enteric viruses and bacterial indicators in German environmental waters.	Pusch	2005	No	Not possible to extract data on HAV prevalence
2022-04-27 08:32:05	Raoul Kenfack Momo	464	Epidemiological and clinical circumstances of contracting viral hepatitis through drinking water.	Puvacić	1977	No	Article not in English or in French
2022-05-07 05:51:58	Raoul Kenfack Momo	465	Comparison of concentration methods for detection of hepatitis A virus in water samples.	Qiao	2016	No	No data on HAV prevalence in water matrices
2022-04-27 08:39:11	Raoul Kenfack Momo	466	Development of an extraction and concentration method for the detection of hepatitis A virus in different samples.	Qing-Ling	2008	No	No data on HAV prevalence in water matrices
		618	Viral pollution in the environment and in shellfish: human adenovirus detection by PCR as an index of human viruses.	Pina	1998	Yes
2022-05-07 06:39:30	Raoul Kenfack Momo	469	Investigating a community-wide outbreak of hepatitis a in India.	Rakesh	2014	No	No data on HAV prevalence in water matrices
2022-05-07 06:53:36	Raoul Kenfack Momo	470	Investigating a community wide outbreak of hepatitis A in Kerala, India.	Rakesh	2018	No	No data on HAV prevalence in water matrices
2022-05-07 06:59:12	Raoul Kenfack Momo	471	Transmission of viral infections by the water route: implications for developing countries.	Ramia	1985	No	No data on HAV prevalence in water matrices
2022-05-07 07:03:09	Raoul Kenfack Momo	472	Interlaboratory Comparative Study to Detect Potentially Infectious Human Enteric Viruses in Influent and Effluent Waters.	Randazzo	2019	No	No data on HAV prevalence in water matrices
2022-04-27 19:44:20	Robertine Lontuo Fogang	473	Improving efficiency of viability-qPCR for selective detection of infectious HAV in food and water samples.	Randazzo	2017	No	No data on HAV prevalence in water matrices
2022-04-27 19:58:12	Robertine Lontuo Fogang	474	Infectious hepatitis: a waterborne outbreak at an air base in France.	Randel	1962	No	No data on HAV prevalence in water matrices
2022-04-27 20:46:40	Robertine Lontuo Fogang	475	Human viruses in sediments, sludges, and soils.	Rao	1986	No	No data on HAV prevalence in water matrices
2022-04-27 21:09:29	Robertine Lontuo Fogang	476	Detection of viruses in drinking water by concentration on magnetic iron oxide.	Rao	1981	No	No data on HAV prevalence in water matrices
2022-04-27 21:22:33	Robertine Lontuo Fogang	477	Investigation of an Outbreak of Hepatitis A in a Coastal Area, Kerala, Southern India.	Raveendran	2016	No	No data on HAV prevalence in water matrices
2022-04-27 21:34:55	Robertine Lontuo Fogang	478	EPIDEMIOLOGY OF WATER BORNE INFECTIOUS HEPATITIS IN A LOCALITY IN POONA.	Rawal	1964	No	Full text or abstract not found
2022-04-27 21:51:55	Robertine Lontuo Fogang	479	ICC/PCR detection of enteroviruses and hepatitis A virus in environmental samples.	Reynolds	2001	No	No data on HAV prevalence in water matrices
2022-04-28 00:38:33	Robertine Lontuo Fogang	480	Evaluation of HA negatively charged membranes in the recovery of human adenoviruses and hepatitis A virus in different water matrices.	Rigotto	2009	No	No data on HAV prevalence in water matrices
2022-05-07 07:30:01	Raoul Kenfack Momo	442	Hepatitis A virus in urban sewage from two Mediterranean countries.	Pintó	2007	Yes		Cross-sectional	Non probabilistic	Consecutive sampling	Multicenter	Urban	Prospectively	Egypt; Eastern Mediterranean; Northern Africa; Lower-middle income economies	Egypt; Spain	Nov/1998-Dec/2002	No	No	No	Yes	Yes	No	Yes	Yes	Yes	Yes	Raw sewage			Guanidinium isothiocyanate	Conventional RT-PCR		5'-UTR	284	53	Genotype I, Genotype II	No
2022-05-06 11:02:28	Raoul Kenfack Momo	447	Hepatitis A Outbreaks and Environmental Circulation of Genotype IA Strains in the São Paulo City, 2017–2018.	Prado	2021	Yes		Cross-sectional	Non probabilistic	Consecutive sampling	Multicenter	Urban	Prospectively	Brazil; America; South America; Upper-middle-income economies		Nov/2017-Nov/2018	No	No	No	Yes	Yes	No	Yes	Yes	Yes	Yes	Raw sewage	2 L	Polyethylene glycol precipitation	QIAamp Viral RNA mini kit	RT-qPCR		5'-UTR	52	40	Genotype I	No
2022-04-28 15:26:34	Robertine Lontuo Fogang	485	Assessing the risk of transmission of viral diseases in flooded areas: Viral load of the river Elbe in Dresden during the flood of August 2002.	Rohayem	2006	No	No data on HAV prevalence in water matrices
2022-04-28 15:44:25	Robertine Lontuo Fogang	486	New molecular methods for the detection of hepatitis A and Norwalk viruses in shellfish.	Romalde	1996	No	No data on HAV prevalence in water matrices
2022-04-28 16:09:29	Robertine Lontuo Fogang	487	Quantitation of hepatitis A virus and enterovirus levels in the lagoon canals and Lido beach of Venice, Italy, using real-time RT-PCR.	Rose	2006	No	No data on HAV prevalence in water matrices
2022-04-28 16:19:18	Robertine Lontuo Fogang	488	The risk of acquiring hepatitis from sewage-contaminated water.	Rosenberg	1980	No	No data on HAV prevalence in water matrices
2022-04-28 16:37:05	Robertine Lontuo Fogang	489	Hepatitis a outbreak epidemiologically linked to a food handler in Melbourne, Victoria.	Rowe	2009	No	No data on HAV prevalence in water matrices
2022-04-28 17:03:01	Robertine Lontuo Fogang	490	An Outbreak of Acute Hepatitis Caused by Genotype IB Hepatitis A Viruses Contaminating the Water Supply in Thailand.	Ruchusatsawat	2016	No	No data on HAV prevalence in water matrices
2022-04-28 17:08:54	Robertine Lontuo Fogang	491	Prevalence of hepatitis A in sewage and drain pipe constructors.	Rumler	2000	No	No data on HAV prevalence in water matrices
2022-04-28 17:22:41	Robertine Lontuo Fogang	492	Microbiological contamination of conventional and reclaimed irrigation water: Evaluation and management measures.	Rusinol	2020	No	No data on HAV prevalence in water matrices
2022-04-28 17:29:32	Robertine Lontuo Fogang	493	Metagenomic analysis of viruses, bacteria and protozoa in irrigation water.	Rusinol	2020	No	No data on HAV prevalence in water matrices
2022-04-28 17:38:06	Robertine Lontuo Fogang	494	Hepatitis a virus infection from a contaminated tap of ground water facility in a Neighborhood Park, Republic of Korea.	Ryu	2019	No	No data on HAV prevalence in water matrices
2022-04-28 17:43:58	Robertine Lontuo Fogang	495	Survival of human enteric viruses in the environment and food.	Rzezutka	2004	No	Review
2022-05-06 11:19:05	Raoul Kenfack Momo	449	Monitoring the hepatitis A virus in urban wastewater from Rio de Janeiro, Brazil.	Prado	2012	Yes		Cross-sectional	Non probabilistic	Consecutive sampling	Monocenter	Urban	Prospectively	Brazil; America; South America; Upper-middle-income economies		Aug/2009-Jul/2010	No	No	No	Yes	Yes	No	Yes	Yes	No	Yes	Raw sewage	100 ml	Ultracentrifugation technique	glass powder method	Conventional RT-PCR		5'-UTR	24	14	Genotype I	Yes	treated effluent samples	100 ml	Ultracentrifugation technique	glass powder method	Conventional RT-PCR		5'-UTR	24	0
2022-05-06 13:29:34	Raoul Kenfack Momo	454	Quantification and molecular characterization of enteric viruses detected in effluents from two hospital wastewater treatment plants.	Prado	2011	Yes		Cross-sectional	Non probabilistic	Consecutive sampling	Monocenter	Urban	Prospectively	Brazil; America; South America; Upper-middle-income economies		2005-2008	No	No	No	Yes	Yes	No	Yes	Yes	Yes	Yes	Sewage effluent		Filtration	QIAamp Viral RNA mini kit	cPCR and qPCR assays		5'-UTR	34	18	Genotype I	No
2022-04-29 16:07:28	Robertine Lontuo Fogang	498	Epidemiological aspects of viral hepatitis in the Upper Valley of the Tiber River.	Salcerini-Pierangeli	1966	No	No data on HAV prevalence in water matrices
2022-04-29 16:15:04	Robertine Lontuo Fogang	499	Multiyear and seasonal hepatitis A morbidity in different population age groups in certain areas.	Schastnyi	1988	No	No data on HAV prevalence in water matrices
2022-04-29 16:39:41	Robertine Lontuo Fogang	500	Incidence rates of hepatitis A by ZIP code area, Salt Lake County, Utah, 1992-1996.	Schlenker	1999	No	No data on HAV prevalence in water matrices
2022-05-06 14:13:50	Raoul Kenfack Momo	455	Large scale survey of enteric viruses in river and waste water underlines the health status of the local population.	Prevost	2015	Yes		Cross-sectional	Non probabilistic	Consecutive sampling	Multicenter	Urban	Prospectively	France; Europe; Western Europe; High-income economies		May/2013-May/2014	No	No	No	Yes	Yes	No	Yes	Yes	Yes	Yes	River water	10 L	Filtration	QIAamp Viral RNA mini kit	Conventional RT-PCR		5'-UTR	275	0		No
2022-04-30 01:46:57	Robertine Lontuo Fogang	503	Comparative study of two extraction methods for enteric virus recovery from sewage sludge by molecular methods.	Schlindwein	2009	No	No data on HAV prevalence in water matrices
2022-04-30 02:07:27	Robertine Lontuo Fogang	505	Viral hepatitis A and exposure to sewage: a confirmed occupational risk.	Schlosser	1995	No	Full text or abstract not found
2022-04-30 02:36:29	Robertine Lontuo Fogang	506	Detection of hepatitis A virus in drinking water by enzyme-immunoassay using ultracentrifugation for virus concentration.	Schnattinger	1985	No	Selection of samples with already HAV result known
2022-04-30 15:01:31	Robertine Lontuo Fogang	507	Collaborative validation of a rapid method for efficient virus concentration in bottled water.	Schultz	2011	No	No data on HAV prevalence in water matrices
2022-04-30 15:06:25	Robertine Lontuo Fogang	508	Infectious disease outbreaks related to drinking water in Canada, 1974-2001.	Schuster	2005	No	No data on HAV prevalence in water matrices
2022-04-27 08:26:35	Raoul Kenfack Momo	459	Human virus detection in drinking water in Zagreb from 1991 to 1994.	Puntaric	1995	Yes		Cross-sectional	Non probabilistic	Consecutive sampling	Monocenter	Urban	Prospectively	Croatia; Europe; Southern Europe; High-income economies		1991-1994	No	No	No	Yes	Yes	No	Yes	Yes	Yes	Yes	Water samples				countercurrent immuno-osmophoresis			271	7		No
2022-04-30 15:46:26	Robertine Lontuo Fogang	510	Development of PCR methods for enteric virus detection in water.	Schwab	1993	No	No data on HAV prevalence in water matrices
2022-04-30 15:53:43	Robertine Lontuo Fogang	511	Concentration and purification of beef extract mock eluates from water samples for the detection of enteroviruses, hepatitis A virus, and Norwalk virus by reverse transcription-PCR.	Schwab	1995	No	No data on HAV prevalence in water matrices
2022-04-30 16:19:27	Robertine Lontuo Fogang	512	Water quality and microbiological status of the distribution system: traditional parameters and emerging parameters.	Scoglio	1989	No	No data on HAV prevalence in water matrices
2022-04-30 16:31:05	Robertine Lontuo Fogang	513	Nine-year study of the occurrence of culturable viruses in source water for two drinking water treatment plants and the influent and effluent of a wastewater treatment plant in Milwaukee, Wisconsin (August 1994 through July 2003).	Sedmak	2005	No	No data on HAV prevalence in water matrices
2022-04-30 16:36:57	Robertine Lontuo Fogang	514	First documented outbreak of hepatitis E virus transmission in Java, Indonesia.	Sedyaningsih-Mamahit	2002	No	No data on HAV prevalence in water matrices
2022-05-08 20:24:36	Raoul Kenfack Momo	462	Molecular characterization of human enteric viruses in food, water samples, and surface swabs in Sicily.	Purpari	2019	Yes		Cross-sectional	Non probabilistic	Consecutive sampling	Multicenter	Urban	Prospectively	Italy; Europe; Southern Europe; High-income economies		2012-2017	No	No	No	Yes	Yes	No	Yes	Yes	Yes	Yes	environmental water sample	10 l	ultrafiltration	NucliSENS miniMAG extraction;	nested (RT) PCR a		5'-UTR	23	0		No
2022-04-30 16:57:39	Robertine Lontuo Fogang	516	Quantitative RT-PCR detection of human noroviruses and hepatitis A virus in fresh produce and surface water used for irrigation in the Mansoura and Giza regions, Egypt.	Shasheen	2022	No	No data on HAV prevalence in water matrices
2022-04-30 17:07:45	Robertine Lontuo Fogang	517	Hepatitis A outbreak traced back to ice used in fruit juice in Nellikuzhi panchayat, Ernakulam district, Kerala state.	Shahin	2018	No	No data on HAV prevalence in water matrices
2022-04-30 02:51:31	Robertine Lontuo Fogang	518	Detection of hepatitis A virus and other enteroviruses in water by ssRNA probes.	Shieh	1991	No	No data on HAV prevalence in water matrices
2022-04-25 18:11:06	Sebastien Kenmoe	520	A waterborne outbreak involving hepatitis A virus genotype IA at a residential facility in the Republic of Korea in 2015.	Shin	2017	No	Not possible to extract data on HAV prevalence
		619	Detection of enteric viruses and bacterial indicators in German environmental waters.	Pusch	2005	Yes
2022-04-25 18:36:02	Sebastien Kenmoe	522	Estimating the global burden of thalassogenic diseases: human infectious diseases caused by wastewater pollution of the marine environment.	Shuval	2003	No	Review
2022-04-25 18:40:15	Sebastien Kenmoe	523	Data on detecting antigens (viruses) in water after washing the hands.	Sidenko	1962	No	Article not in English or in French
2022-04-25 18:50:51	Sebastien Kenmoe	524	Sewage pollution in urban stormwater runoff as evident from the widespread presence of multiple microbial and chemical source tracking markers.	Sidhu	2013	No	No data on HAV prevalence in water matrices
2022-04-25 18:53:34	Sebastien Kenmoe	526	Detection of hepatitis A virus (HAV) in oysters (Crassostrea gigas).	Sincero	2006	No	No data on HAV prevalence in water matrices
2022-04-25 18:54:25	Sebastien Kenmoe	527	Viruses in recreational water-borne disease outbreaks: A review.	Sinclair	2009	No	Review
2022-04-25 18:56:24	Sebastien Kenmoe	528	Microbiological status of drinking water sources and its relationship with human health in Solan, India.	Singh	2021	No	No data on HAV prevalence in water matrices
2022-04-25 18:58:17	Sebastien Kenmoe	529	Epidemiological investigation of an outbreak of viral hepatitis.	Singh	2006	No	No data on HAV prevalence in water matrices
2022-04-25 19:00:06	Sebastien Kenmoe	530	Viruses in water.	Smith	1979	No	Editorial
2022-04-25 19:05:50	Sebastien Kenmoe	531	Evaluation of methods for concentrating hepatitis A virus from drinking water.	Sobsey	1985	No	No data on HAV prevalence in water matrices
2022-04-26 06:55:39	Sebastien Kenmoe	532	Detection of hepatitis A virus (HAV) in drinking water.	Sobsey	1985	No	No data on HAV prevalence in water matrices
2022-04-26 06:57:22	Sebastien Kenmoe	533	Comparative inactivation of hepatitis A virus and other enteroviruses in water by iodine.	Sobsey	1991	No	No data on HAV prevalence in water matrices
2022-04-26 07:39:30	Sebastien Kenmoe	534	Seasonality of enteric viruses in groundwater-derived public water sources.	Sorensen	2021	No	Not possible to extract data on HAV prevalence
2022-04-26 07:45:52	Sebastien Kenmoe	535	Ultrafiltration and reverse transcription-polymerase chain reaction: An efficient process for poliovirus, rotavirus and hepatitis A virus detection in water.	Soule	2000	No	No data on HAV prevalence in water matrices
2022-04-26 12:23:14	Sebastien Kenmoe	536	Evaluation of tropical water sources and mollusks in southern Brazil using microbiological, biochemical, and chemical parameters.	Souza	2012	No	Sample size < or = 10 participants
2022-04-26 12:26:28	Sebastien Kenmoe	537	Low occurrence of Hepatitis A virus in water samples from an urban area of Southern Brazil.	Souza	2018	No	No data on HAV prevalence in water matrices
2022-04-26 12:31:26	Sebastien Kenmoe	538	Investigation of a hepatitis A outbreak in children in an urban slum in Vellore, Tamil Nadu, using geographic information systems.	Sowmyanarayanan	2008	No	No data on HAV prevalence in water matrices
2022-04-26 12:39:16	Sebastien Kenmoe	539	Comparison of static and dynamic disinfection models for bacteria and viruses in water of varying quality.	Springthorpe	2001	No	No data on HAV prevalence in water matrices
2022-04-26 12:44:39	Sebastien Kenmoe	540	In situ survival of indicator bacteria, MS-2 phage and human pathogenic viruses in river water.	Springthorpe	1993	No	No data on HAV prevalence in water matrices
2022-04-26 12:47:59	Sebastien Kenmoe	541	Hepatitis E outbreak among factory workers due to contaminated factory water, Mandya District, Karnataka, India, 2015.	Sree Kalpana	2016	No	No data on HAV prevalence in water matrices
2022-05-07 06:34:41	Raoul Kenfack Momo	468	Potentially infectious novel hepatitis a virus strains detected in selected treated wastewater discharge sources, South Africa.	Rachida	2020	Yes		Cross-sectional	Non probabilistic	Consecutive sampling	Multicenter	Urban	Prospectively	South Africa; Africa; Southern Africa; Upper-middle-income economies		Apr/2015-Mar/2016	No	No	No	Yes	Yes	No	Yes	Yes	No	Yes	Sewage inflow	1 L	Polyethylene glycol precipitation	semi-automated NucliSENS®	RT-qPCR		VP1	54	43	Genotype I	Yes	Treated wastewater discharge	10 L	Polyethylene glycol precipitation	semi-automated NucliSENS®	RT-qPCR		VP1	52	43	Genotype I	Dam water	10 L
		633	Genetic characterization of a novel hepatitis a virus strain in irrigation water in South Africa.	Rachida	2016	Yes
2022-04-27 08:29:09	Sebastien Kenmoe	544	Detection of naturally occurring enteroviruses and hepatitis A virus in undigested and anaerobically digested sludge using the polymerase chain reaction.	Straub	1994	No	Sample size < or = 10 participants
2022-04-27 08:30:46	Sebastien Kenmoe	545	Persistence of enteroviruses in sewage sludge.	Subrahmanyan	1977	No	No data on HAV prevalence in water matrices
2022-04-27 08:33:47	Sebastien Kenmoe	546	Occurrence of enteric viruses in shellfish and relation to climatic-environmental factors.	Suffredini	2008	No	No data on HAV prevalence in water matrices
2022-04-27 08:35:44	Sebastien Kenmoe	547	Outbreak of hepatitis A spread by contaminated drinking glasses in a public house.	Sundkvist	2000	No	No data on HAV prevalence in water matrices
2022-04-27 08:39:07	Sebastien Kenmoe	548	A water-borne hepatitis A outbreak in Rio de Janeiro.	Sutmoller	1982	No	No data on HAV prevalence in water matrices
2022-04-27 08:40:59	Sebastien Kenmoe	549	Eukaryotic viruses in wastewater samples from the United States.	Symonds	2009	No	No data on HAV prevalence in water matrices
2022-04-27 08:45:36	Sebastien Kenmoe	550	Health and the quality of drinking water in Adana City Centre, Turkey.	Bahcebasi	1997	No	Full text or abstract not found
2022-04-27 08:48:26	Sebastien Kenmoe	551	Enteric virus levels in river water.	Tani	1992	No	No data on HAV prevalence in water matrices
2022-04-27 08:49:35	Sebastien Kenmoe	552	Hepatite a outbreak in an urban area of Luziânia, state of Goiás, Brazil, 2009.	Tauil	2010	No	Article not in English or in French
2022-04-27 08:51:51	Sebastien Kenmoe	553	A serosurvey of water-borne pathogens amongst canoeists in South Africa.	Taylor	1995	No	No data on HAV prevalence in water matrices
2022-04-30 17:18:48	Robertine Lontuo Fogang	482	Assessment of adenovirus, hepatitis A virus and rotavirus presence in environmental samples in Florianopolis, South Brazil.	Rigotto	2010	Yes		cross sectional	not reported	not reported	Multicenter	urban	Prospectively	Brazil; America; South America; Upper-middle-income economies		June 2007-May2008	no	no	not applicable	not applicable	not applicable	no	yes	not applicable	yes	yes	seawater, lagoon water, drinking water				RT-PCR			84	7
2022-04-27 09:04:24	Sebastien Kenmoe	555	Epidemiological aspects of viral hepatitis. Living conditions and water transmission.	Telniceanu	1971	No	Full text or abstract not found
2022-04-28 01:45:13	Robertine Lontuo Fogang	484	Analysis of the evolution in the circulation of HAV and HEV in Eastern Spain by testing urban sewage samples.	Rodriguez-manzano	2010	Yes		Comparative study	Non probabilistic	Stratified sampling	Multicenter	Urban	Prospectively	Spain; Europe; Southern Europe; High-income economies		2000-2008	No	Yes	No	Yes	Yes	Unclear	Yes	Yes	Yes	Yes	Sewage influent	42ml	Ultracentrifugation technique	QIAamp Viral RNA mini kit	nested RT-PCR		5'-UTR	91	7	Genotype IA and IB	No
2022-04-27 19:20:20	Sebastien Kenmoe	557	The risk of hepatitis A from sewage contamination of a water supply.	Thornton	1995	No	No data on HAV prevalence in water matrices
2022-04-27 19:23:39	Sebastien Kenmoe	558	Investigation of F-RNA Bacteriophage as a Tool in Re-Opening Australian Oyster Growing Areas Following Sewage Spills.	Torok	2021	No	No data on HAV prevalence in water matrices
2022-04-27 20:14:12	Sebastien Kenmoe	559	Study of a hepatitis e virus outbreak involving drinking water and sewage contamination in Shimla, India, 2015-2016.	Tripathy	2019	No	Sample size < or = 10 participants
2022-04-27 19:48:30	Sebastien Kenmoe	560	An outbreak of hepatitis E in Yavatmal, India, 2019.	Tripathy	2021	No	Sample size < or = 10 participants
		620	Standard and new faecal indicators and pathogens in sewage treatment plants, microbiological parameters for improving the control of reclaimed water.	Rodriguez-Manzano	2012	Yes
2022-04-27 20:16:47	Sebastien Kenmoe	562	Persistence of Hepatitis A Virus RNA in Water, on Non-porous Surfaces, and on Blueberries.	Trudel-Ferland	2021	No	No data on HAV prevalence in water matrices
2022-04-27 20:32:10	Sebastien Kenmoe	563	Simple method of concentrating enteroviruses and hepatitis a virus from sewage and ocean water for rapid detection by reverse transcriptase- polymerase chain reaction.	Tsai	1993	No	Sample size < or = 10 participants
2022-04-27 20:39:19	Sebastien Kenmoe	564	Detection of poliovirus, hepatitis A virus, and rotavirus from sewage and ocean water by triplex reverse transcriptase PCR.	Tsai	1994	No	Sample size < or = 10 participants
2022-04-28 17:56:16	Robertine Lontuo Fogang	496	Genomic detection of waterborne enteric viruses as water quality indicators in Al-Zarqa River, Jordan.	Saadoun	2021	Yes
2022-04-27 21:00:54	Sebastien Kenmoe	566	Safety of community drinking-water and outreaks of waterborne enteric disease: Israel, 1976-97.	Tulchinsky	2000	No	No data on HAV prevalence in water matrices
2022-04-26 08:38:16	Serges Tchatchouang	567	Prevalence of human pathogenic enteric viruses in bivalve molluscan shellfish and cultured shrimp in south west coast of India.	Umesha	2008	No	No data on HAV prevalence in water matrices
2022-04-26 08:39:54	Serges Tchatchouang	568	Occurrence of Human Enteric Viruses in Water Sources and Shellfish: A Focus on Africa.	Upfold	2021	No	Review
2022-04-28 18:27:59	Robertine Lontuo Fogang	497	Molecular characterisation of hepatitis A virus strains from water sources in South Africa.	Said	2014	Yes		Cross-sectional	Non probabilistic	Stratified sampling	Multicenter	Urban	Retroprospectively	South Africa; Africa; Southern Africa; Upper-middle-income economies		Aug 2010-Dec 2011	No	Yes	No	Yes	Yes	Unclear	Yes	Yes	Yes	Yes	Wastewater sample	75-100ml	PEG8000/NaCl precipitation	NucliSENS easyMAG	Real-time RT-PCR		5'-UTR	51	19	Genotype IB	No
2022-04-30 01:37:18	Robertine Lontuo Fogang	501	Detection of enteric viruses in sewage sludge and treated wastewater effluent.	Schlindwein	2010	Yes		Cross-sectional	Non probabilistic	Stratified sampling	Monocenter	Urban	Prospectively	Brazil; America; South America; Upper-middle-income economies		Jun 2007- May 2008	Not applicable	Yes	Unclear	Yes	Yes	Unclear	Yes	Yes	Yes	Yes	Treated wastewater efluent	NR	Polyethylene glycol precipitation	TRIzOL reagent	Real-time RT-PCR		5'-UTR	123			No
2022-04-30 15:36:22	Robertine Lontuo Fogang	509	PCR detection of human enteric viruses in bathing areas, waste waters and human stools in Southwestern France.	Schvoerer	2000	Yes		Unclear/ Not reported	Non probabilistic	Stratified sampling	Monocenter	Urban	Retroprospectively	France; Europe; Western Europe; High-income economies		Jun- Sep 1998	Not applicable	Yes	No	Yes	Yes	Unclear	Yes	Yes	No	Yes	Wastewater sample		Polyethylene glycol precipitation	Guanidinium isothiocyanate	Real-time RT-PCR		VP1	13	3		No
2022-04-30 16:44:47	Robertine Lontuo Fogang	515	Quantitative PCR-based identification of enteric viruses contaminating fresh produce and surface water used for irrigation in Egypt.	Shaheen	2019	Yes
2022-05-07 16:56:17	Serges Tchatchouang	574	The evaluation of contamination of water objects with hepatitis A virus (HAV) and the impact of HAV on morbidity trends in large seaports of the Ukraine.	Vasil'ev	2006	No	Article not in English or in French
2022-05-07 18:12:02	Serges Tchatchouang	576	Hepatitis A outbreak in Hulu Langat District, Selangor State, Malaysia during April--October 2002.	Venugopalan	2004	No	No data on HAV prevalence in water matrices
2022-04-25 18:29:51	Sebastien Kenmoe	521	Foodborne Viruses Detected Sporadically in the Fresh Produce and Its Production Environment in South Korea.	Shin	2019	Yes		Cross-sectional	Non probabilistic	Consecutive sampling	Monocenter	Unclear/Not reported	Prospectively	South Korea; Western Pacific; Eastern Asia; High-income economies		Jan/2016-Dec/2017	No	Yes	No	Not applicable	Yes	No	Yes	Yes	Yes	Yes	Irrigation water	500 mL	adsorption– elution technique	RNeasy Mini kit	Real-time RT-PCR			14	0		No
2022-05-07 18:44:23	Serges Tchatchouang	578	Viral hepatitis A: water epidemic in a bungalow community (Czech).	Vilim	1977	No	Article not in English or in French
2022-05-07 19:21:09	Serges Tchatchouang	579	Identification of enteric viruses from raw water using fluoro-immuno-magnetic separation coupled to RT-PCR.	Villamizar	2021	No	No data on HAV prevalence in water matrices
2022-05-08 07:25:32	Serges Tchatchouang	581	Hepatitis A Outbreak in a Public School in Rio de Janeiro, Brazil.	Villar	2002	No	No data on HAV prevalence in water matrices
		621	Release of infectious human enteric viruses by full-scale wastewater utilities.	Simmons	2011	Yes
2022-05-08 08:26:09	Serges Tchatchouang	583	Evaluation of methods used to concentrate and detect hepatitis A virus in water samples.	Villar	2006	No	Sample size < or = 10 participants
2022-05-08 08:30:09	Serges Tchatchouang	584	Aptamer-based approaches for the detection of waterborne pathogens.	Vishwakarma	2021	No	Review
2022-05-08 09:04:34	Serges Tchatchouang	585	Hepatitis A epidemics from utility sewage in Ocoee, Florida.	Vonstille	1993	No	No data on HAV prevalence in water matrices
2022-05-08 09:25:44	Serges Tchatchouang	586	Contributing factors to disease outbreaks associated with untreated groundwater.	Wallender	2014	No	No data on HAV prevalence in water matrices
2022-05-08 09:29:24	Serges Tchatchouang	587	Interactions between biotic and abiotic factors and viruses in a water system.	Walter	1985	No	No data on HAV prevalence in water matrices
2022-04-26 13:13:05	Sebastien Kenmoe	542	Enteric viruses and adenovirus diversity in waters from 2016 Olympic venues.	Staggemeier	2017	Yes		Cross-sectional	Non probabilistic	Consecutive sampling	Multicenter	Unclear/Not reported	Prospectively	Brazil; America; South America; Upper-middle-income economies		Mar/2016-Jul/2016	No	Yes	No	Yes	Yes	No	Yes	Yes	Yes	Yes	Surface water	500 mL	Ultracentrifugation technique	RTP DNA/RNA Virus Mini Kit	Real-time RT-PCR			146	0		No
2022-05-08 10:06:00	Serges Tchatchouang	589	Differential removal of human pathogenic viruses from sewage by conventional and ozone treatments.	Wang	2018	No	No data on HAV prevalence in water matrices
2022-04-26 13:30:40	Sebastien Kenmoe	543	The Detection Rate of Enteric Viruses and Clostridium difficile in a Waste Water Treatment Plant Effluent.	Steyer	2015	Yes		Cross-sectional	Non probabilistic	Consecutive sampling	Monocenter	Unclear/Not reported	Prospectively	Slovenia; Europe; Southern Europe; High-income economies		Jan/2012-Dec/2012	No	Yes	No	Not applicable	Yes	No	Yes	Yes	Yes	Yes	Sewage effluent	5000 mL	Convective interac- tion media (CIM) quaternary amine (QA) 8 ml tube monolithic column (BIA separations, Slovenia) on an AKTA 100 puriﬁer	QIAamp Viral RNA mini kit	Real-time RT-PCR			12	0		No
2022-05-08 10:10:13	Serges Tchatchouang	591	Viral hepatitis and gastroenteritis transmitted by shellfish and water.	Wanke	1987	No	Review
2022-05-08 10:13:47	Serges Tchatchouang	592	Hepatitis A in waste water treatment plant workers: Is vaccination necessary? [2].	Warlen	1998	No	Full text or abstract not found
2022-05-08 10:18:36	Serges Tchatchouang	593	Prevalence of antibody to hepatitis a virus in drinking water workers and wastewater workers in Texas from 1996 to 1997.	Weldon	2000	No	No data on HAV prevalence in water matrices
2022-05-08 10:25:19	Serges Tchatchouang	594	A waterborne outbreak of infectious hepatitis in a small Maryland town.	Whatley	1968	No	No data on HAV prevalence in water matrices
2022-05-08 10:28:48	Serges Tchatchouang	595	Enteric viruses in New Zealand drinking-water sources.	Williamson	2011	No	No data on HAV prevalence in water matrices
		622	Viral, bacterial, and protozoan pathogens and fecal markers in wells supplying groundwater to public water systems in Minnesota, USA.	Stokdyk	2020	Yes
2022-05-08 11:26:49	Serges Tchatchouang	598	A new method of RNA preparation for detection of hepatitis A virus in environmental samples by the polymerase chain reaction.	Yang	1993	No	No data on HAV prevalence in water matrices
2022-05-08 11:54:09	Serges Tchatchouang	599	Major human Hepatitis A virus genotype in Hong Kong marine waters and detection by real-time PCR.	Yang	2011	No	Sample size < or = 10 participants
2022-05-08 12:03:01	Serges Tchatchouang	601	Assessment of microbiological water quality and its relation to human health in Gaza Governorate, Gaza Strip.	Yassin	2006	No	No data on HAV prevalence in water matrices
2022-05-08 12:00:03	Serges Tchatchouang	602	An outbreak of hepatitis A associated with a contaminated well in a middle school, Guangxi, China.	Ye-Qing	2012	No	No data on HAV prevalence in water matrices
2022-05-08 12:11:30	Serges Tchatchouang	603	Surveillance for waterborne disease and outbreaks associated with drinking water and water not intended for drinking--United States, 2005-2006.	Yoder	2008	No	No data on HAV prevalence in water matrices
2022-05-08 12:15:27	Serges Tchatchouang	604	Epidemiological and virological characterization of a communityoutbreak of hepatitis A: Hospital-based case control study.	Yoon	2009	No	No data on HAV prevalence in water matrices
2022-05-08 12:19:50	Serges Tchatchouang	605	Survey of Gram Negative and Gram Positive Bacteria in Drinking Water Supplies in Karachi, Pakistan.	Yousuf	2014	No	No data on HAV prevalence in water matrices
2022-05-08 12:24:43	Serges Tchatchouang	606	Pollution of Inshore Seawater and Shellfish Due to Hepatitis A Virus in Liaoning Province.	Yue	1993	No	Full text or abstract not found
2022-05-08 12:25:59	Serges Tchatchouang	607	Evaluation of the role of a water factor in the seasonal incidence of hepatitis A.	Zak	1988	No	Article not in English or in French
2022-05-08 12:33:45	Serges Tchatchouang	608	An outbreak of hepatitis A in recently vaccinated students from ice snacks made from contaminated well water.	Zhang	2009	No	No data on HAV prevalence in water matrices
2022-05-08 12:35:17	Serges Tchatchouang	609	Detection and quantification of hepatitis a virus in Tianjin Coastal Seawater of Bohai Bay.	Zhang	2009	No	Article not in English or in French
2022-05-08 12:39:22	Serges Tchatchouang	610	Drinking Water Quality and Intestinal Infectious Diseases in Urban and Rural Boarding Schools in Guangxi.	Zhenzhu	1993	No	Full text or abstract not found
2022-05-08 12:41:12	Serges Tchatchouang	611	Concentration and detection of hepatitis A virus and rotavirus from shellfish by hybridization tests.	Zhou	1991	No	No data on HAV prevalence in water matrices
2022-05-08 12:43:04	Serges Tchatchouang	612	The role of the water factor of transmission in the spread of viral hepatitis A and dysentery under the conditions in an industrial city.	Zlobina	1993	No	Article not in English or in French
2022-05-08 12:44:13	Serges Tchatchouang	613	[Integrate cell culture--PCR (ICC/PCR) in viruses researches in environmental and food samples. Note I].	Zoni	2006	No	Article not in English or in French
2022-04-27 09:03:31	Sebastien Kenmoe	554	The occurrence of hepatitis A and astroviruses in selected river and dam waters in South Africa.	Taylor	2001	Yes		Cross-sectional	Non probabilistic	Consecutive sampling	Monocenter	Unclear/Not reported	Prospectively	South Africa; Africa; Southern Africa; Upper-middle-income economies		Jun/1997-May/1998	No	Yes	No	Not applicable	Yes	No	Yes	Yes	Yes	Yes	Surface water, river and dam water samples		Polyethylene glycol precipitation	QIAamp Viral RNA mini kit	Conventional RT-PCR		VP3, VP1	102	37		No
2022-04-27 19:17:03	Sebastien Kenmoe	556	Detection of nineteen enteric viruses in raw sewage in Japan.	Thongprachum	2018	Yes		Cross-sectional	Non probabilistic	Consecutive sampling	Monocenter	Unclear/Not reported	Prospectively	Japan; Western Pacific; Eastern Asia; High-income economies		Jul/2015-Jun/2016	No	Yes	No	Not applicable	Yes	No	Yes	Yes	Yes	Yes	Raw sewage	100 mL	Modiﬁed polyethylene glycol precipitation		Conventional RT-PCR		VP1, 2A1, 2A2, 2A3	12	0		No
2022-04-27 20:11:38	Sebastien Kenmoe	561	Monitoring of human enteric virus and coliphages throughout water reuse system of wastewater treatment plants to irrigation endpoint of leafy greens.	Truchado	2021	Yes		Cross-sectional	Non probabilistic	Consecutive sampling	Monocenter	Unclear/Not reported	Prospectively	Spain; Europe; Southern Europe; High-income economies		nr	No	Yes	No	Not applicable	Yes	No	Yes	Yes	Unclear	Yes	Sewage effluent, Sewage influent	200 mL	Aluminum hydroxide adsorption-precipitation method, Polyethylene glycol precipitation	QIAamp Viral RNA mini kit	Real-time RT-PCR			475	12		No
2022-04-27 20:57:19	Sebastien Kenmoe	565	Environmental hepatitis A detection and awareness on a Native American reservation.	Tucker	2000	Yes		Cross-sectional	Non probabilistic	Consecutive sampling	Monocenter	Unclear/Not reported	Prospectively	United States of America; America; Northern America; High-income economies		nr	No	Yes	No	Not applicable	Yes	No	Yes	Yes	Unclear	Yes	Groundwater, Surface water	1000 mL		Guanidinium isothiocyanate	Conventional RT-PCR		VP3, VP1	24	1		No
2022-04-26 10:28:10	Serges Tchatchouang	569	Polymerase chain reaction-based prevalence of hepatitis A, hepatitis E and TT viruses in sewage from an endemic area.	Vaidya	2002	Yes		Unclear/ Not reported	Probabilistic	Systematic sampling	Monocenter	Unclear/Not reported	Prospectively	India; South-East Asia; Southern Asia; Lower-middle income economies		Feb/1999-Jan/2000	Unclear	Yes	Yes	Yes	Yes	No	Yes	Yes	Yes	Yes	Sewage influent	100 ml	Ultracentrifugation technique	TRIzOL reagent	Nested PCR		RNA polymerase region, genotype IBbased	86	21	Genotype IB in 8 SW	Yes	Sewage effluent	100 mL	Ultracentrifugation technique	TRIzOL reagent	Nested PCR		RNA polymerase region, genotype IBbased	48	2
2022-04-28 07:00:39	Serges Tchatchouang	570	Detection of potentially pathogenic enteric viruses in environmental samples from Kenya using the bag-mediated filtration system.	van Zyl	2019	Yes		Surveillance	Probabilistic	Stratified sampling	Multicenter	Unclear/Not reported	Prospectively	Kenya; Africa; Eastern Africa; Lower-middle income economies		Apr/2015-Apr/2016	Unclear	Unclear	Yes	Yes	Yes	Unclear	Yes	Yes	Yes	Yes	Fecally polluted water samples	2,9 L	bag-mediated filtration system	NucliSENS easyMAG	Real-time RT-PCR	2 cq (mean =30.4)		59	59		No
2022-04-28 07:42:06	Serges Tchatchouang	572	Detection of enteroviruses, adenoviruses and Hepatitis A viruses in raw sewage and treated effluents by nested-PCR.	Vantarakis	1999	Yes		Cross-sectional	Probabilistic	Systematic sampling	Monocenter	Urban	Prospectively	Greece; Europe; Southern Europe; High-income economies		1995–1996	Unclear	Unclear	Yes	Yes	Yes	Unclear	Yes	Yes	Yes	Yes	Raw sewage, treated effluent	100 ml	Filtration, organic flocculation		Conventional RT-PCR			24	0		No
2022-05-07 16:49:39	Serges Tchatchouang	573	Evaluation of microbiological quality of coastal waters in Greece.	Vantarakis	2005	Yes		Survey	Non probabilistic	Systematic sampling	Multicenter	Unclear/Not reported	Prospectively	Greece; Europe; Southern Europe; High-income economies		May/2000-Aug/2000	Unclear	Unclear	Yes	Yes	Yes	Unclear	Yes	Yes	No	Yes	bathing sites	20 Litres	Filtration		Conventional RT-PCR, Nested PCR			234	0		No
		634	Hepatitis A virus in surface water in South Africa: what are the risks?	Venter	2007	Yes
2022-05-07 18:42:22	Serges Tchatchouang	577	Hepatitis e virus-based evaluation of a virion concentration method and detection of enteric viruses in environmental samples by multiplex nested RT-PCR.	Verma	2010	Yes		Survey	Non probabilistic	Systematic sampling	Multicenter	Unclear/Not reported	Prospectively	India; South-East Asia; Southern Asia; Lower-middle income economies		NR	Unclear	Yes	Yes	Yes	Yes	Unclear	Yes	Yes	Yes	Yes	River water	40 l	adsorption-elution-based virus concentration protocol	QIAamp Viral RNA mini kit	Multiplex nested PCR		5'NCR region	64	49	Genotype III	Yes	Drinking water	40 l	two-step membrane filtration–based concentration method	QIAamp Viral RNA mini kit	Multiplex real-time PCR		5'NCR	662	0
2022-05-08 08:19:28	Serges Tchatchouang	582	Molecular detection of hepatitis A virus in urban sewage in Rio de Janeiro, Brazil.	Villar	2007	Yes		Survey	Probabilistic	Systematic sampling	Multicenter	Urban	Prospectively	Brazil; America; South America; Upper-middle-income economies		2005	Unclear	Yes	Yes	Yes	Yes	Unclear	Yes	Yes	Yes	Yes	Raw sewage, Treated sewage	2 L	Ultracentrifugation technique, adsorption to an electronegative membrane	QIAamp Viral RNA mini kit	Real-time RT-PCR, Nested PCR	120-890 copies per mL	VP1 ⁄ 2A region, 5' noncoding region	50	46	9 subgenotype IA and 7 to subgenotype IB	Yes	Raw sewage	2 L	Ultracentrifugation technique, adsorption to an electronegative membrane	QIAamp Viral RNA mini kit	Nested PCR		VP1/2A region	25	8	Genotype I	Raw sewage	2L
2022-05-08 09:57:28	Serges Tchatchouang	588	Variations among Viruses in Influent Water and Effluent Water at a Wastewater Plant over One Year as Assessed by Quantitative PCR and Metagenomics.	Wang	2020	Yes
		627	Outbreaks of hepatitis A among children in western India.	Chadha	2009	No	Sample size < or = 10 participants
2022-05-10 11:58:09	Sebastien Kenmoe	590	Effects of Weather and Environmental Factors on the Seasonal Prevalence of Foodborne Viruses in Irrigation Waters in Gyeonggi Province, Korea.	Wang	2020	Yes		Cross-sectional	Non probabilistic	Consecutive sampling	Multicenter	Unclear/Not reported	Prospectively	South Korea; Western Pacific; Eastern Asia; High-income economies		May/2017-Nov/2018	No	Yes	No	Not applicable	Yes	No	Yes	Yes	Yes	Yes	Irrigation water	250 mL	Adsorption-elution technique	RNeasy mini kit	Real-time RT-PCR			96	0		No
		629	Investigation of a hepatitis A outbreak from Shimla Himachal Pradesh.	Chobe	2009	No	Sample size < or = 10 participants
		623	Differential removal of human pathogenic viruses from sewage by conventional and ozone treatments.	Wang	2018	Yes
		631	Occurrence of Human Enteric Viruses in Shellfish along the Production and Distribution Chain in Sicily, Italy.	Macaluso	2021	No	No data on HAV prevalence in water matrices
		632	Monitoring of human enteric viruses and coliform bacteria in waters after urban flood in Jakarta, Indonesia.	Phanuwan	2006	No	Not possible to extract data on HAV prevalence
		624	Detection and characterization of human pathogenic viruses circulating in community wastewater using multi target microarrays and polymerase chain reaction.	Wong	2013	Yes
2022-05-08 11:18:41	Serges Tchatchouang	596	Evidence of hepatitis A virus circulation in central Argentina: seroprevalence and environmental surveillance.	Yanez	2014	Yes		Surveillance	Probabilistic	Systematic sampling	Multicenter	Unclear/Not reported	Prospectively	Argentina; America; South America; Upper-middle-income economies		2009-2010	Yes	Yes	Yes	Yes	Yes	Unclear	Yes	Yes	Yes	Yes	Raw sewage, River water	1500 mL	centrifugation and polyethylenglicol precipitation	QIAamp Viral RNA mini kit	Nested PCR		5'-UTR, VP1-2A junction	55	10	Genotype I	Yes	River water	1500 mL	centrifugation and polyethylenglicol precipitation	QIAamp Viral RNA mini kit	Nested PCR		5'-UTR, VP1-2A junction	31	5		Raw sewage	1500 mL
[truncated: 202 more columns]
